1 **A trafficome-wide RNAi screen reveals deployment of early and late**  
2 **secretory host proteins and the entire late endo-/lysosomal vesicle fusion**  
3 **machinery by intracellular *Salmonella***

4

5 Alexander Kehl<sup>1,4</sup>, Vera Göser<sup>1</sup>, Tatjana Reuter<sup>1</sup>, Viktoria Liss<sup>1</sup>, Maximilian Franke<sup>1</sup>,

6 Christopher John<sup>1</sup>, Christian P. Richter<sup>2</sup>, Jörg Deiwick<sup>1</sup> and Michael Hensel<sup>1</sup>.

7

8 <sup>1</sup>Division of Microbiology, University of Osnabrück, Osnabrück, Germany; <sup>2</sup>Division of Biophysics, University

9 of Osnabrück, Osnabrück, Germany, <sup>3</sup>CellNanOs – Center for Cellular Nanoanalytics, Fachbereich

10 Biologie/Chemie, Universität Osnabrück, Osnabrück, Germany; <sup>4</sup>current address: Institute for Hygiene,

11 University of Münster, Münster, Germany

12

13 Running title: Host factors for SIF formation

14 Keywords: siRNA knockdown, live cell imaging, *Salmonella*-containing vacuole, *Salmonella*-

15 induced filaments

16

17 *Address for correspondence:*

18 Alexander Kehl

19 Institute for Hygiene

20 University of Münster

21 Robert-Koch-Str. 4148149 Münster, Germany

22 Tel.: +49(0)251/83-55233

23 E-mail: alexander.kehl@ukmuenster.de

24

25 or

18.11.2019

Host factors for SIF formation

26

27 Michael Hensel

28 Abteilung Mikrobiologie

29 CellNanOs – Center for Cellular Nanoanalytics Osnabrück

30 Fachbereich Biologie/Chemie, Universität Osnabrück

31 Barbarastr. 11

32 49076 Osnabrück, Germany

33 Tel: ++ 49 (0)541 969 3940

34 Fax: ++ 49 (0)541 969 3942

35 E-mail: [Michael.Hensel@uni-osnabrueck.de](mailto:Michael.Hensel@uni-osnabrueck.de)

18.11.2019

Host factors for SIF formation

## 37 **Abstract**

38 The intracellular lifestyle of *Salmonella enterica* is characterized by the formation of a  
39 replication-permissive membrane-bound niche, the *Salmonella*-containing vacuole (SCV). A  
40 further consequence of the massive remodeling of the host cell endosomal system, intracellular  
41 *Salmonella* establish a unique network of various *Salmonella*-induced tubules (SIT). The  
42 bacterial repertoire of effector proteins required for the establishment for one type of these SIT,  
43 the *Salmonella*-induced filaments (SIF), is rather well-defined. However, the corresponding  
44 host cell proteins are still poorly understood. To identify host factors required for the formation  
45 of SCV and SIF, we performed a sub-genomic RNAi screen. The analyses comprised high-  
46 resolution live cell imaging to score effects on SIF induction, dynamics and morphology. The  
47 hits of our functional RNAi screen comprise: i) The late endo-/lysosomal SNARE (soluble *N*-  
48 ethylmaleimide-sensitive factor attachment protein receptor) complex, consisting of STX7,  
49 STX8, VTI1B, and VAMP7 or VAMP8, this is, in conjunction with RAB7 and the homotypic  
50 fusion and protein sorting (HOPS) tethering complex, a complete vesicle fusion machinery. ii)  
51 Novel interactions with the early secretory GTPases RAB1A and RAB1B, possibly providing  
52 a link to coat protein complex I (COPI) vesicles and reinforcing recently identified ties to the  
53 endoplasmic reticulum. iii) New connections to the late secretory pathway and/or the recycling  
54 endosome via the GTPases RAB3A, RAB8A, and RAB8B and the SNAREs VAMP2, VAMP3,  
55 and VAMP4. iv) An unprecedented involvement of clathrin-coated structures. The resulting set  
56 of hits allowed to characterize completely new host factor interactions, and strengthen  
57 observations from several previous studies.

## 58 **Author Summary**

59 The facultative intracellular pathogen *Salmonella enterica* serovar Typhimurium induces the  
60 reorganization of the endosomal system of mammalian host cells. This activity is dependent on  
61 translocated effector proteins of the pathogen. The host cells factors required for endosomal

18.11.2019

Host factors for SIF formation

62 remodeling are only partially known. To identify such factors for formation and dynamics of  
63 endosomal compartments in *Salmonella*-infected cell, we performed a live cell imaging-based  
64 RNAi screen a to investigate the role of 496 mammalian proteins involved in cellular logistics.  
65 We identified that endosomal remodeling by intracellular *Salmonella* dependent on host factors  
66 in following functional classes: i) the late endo-/lysosomal SNARE (soluble *N*-ethylmaleimide-  
67 sensitive factor attachment protein receptor) complex, ii) the early secretory pathway,  
68 represented by regulators GTPases RAB1A and RAB1B, iii) the late secretory pathway and/or  
69 recycling endosomes represented by GTPases RAB3A, RAB8A, RAB8B, and the SNAREs  
70 VAMP2, VAMP3, and VAMP4, and iv) clathrin-coated structures. The identification of these  
71 new host factors provides further evidence for the complex manipulation of host cell transport  
72 functions by intracellular *Salmonella* and should enable detailed follow-up studies on the  
73 mechanisms involved.

18.11.2019

Host factors for SIF formation

## 75 **Introduction**

76 The food-borne, facultative intracellular pathogen *Salmonella enterica* serovar Typhimurium  
77 (STM) is the etiological agent of gastroenteritis in humans or systemic infections in mice [1].

78 An early step in disease is the active invasion of epithelial cells. This process is dependent on  
79 the translocation of effector proteins by STM into the host cell through a type 3 secretion system  
80 (T3SS) encoded on *Salmonella* pathogenicity island 1 (SPI1) [2, 3].

81 After invasion STM, similar to many other intracellular pathogens, establish a replicative niche  
82 in host cells, termed *Salmonella*-containing vacuole (SCV). This process is dependent on the  
83 function of a distinct T3SS, encoded by SPI2 [4, 5] and translocating another set of effectors  
84 [6]. Though initially associating with markers of the early endosome (EE) such as EEA1 and  
85 the small GTPase RAB5 [7, 8], the SCV finally acquires several markers of the late endosome  
86 (LE). These include lysosome-associated membrane proteins (LAMPs) [9, 10], the vacuolar  
87 ATPase [11], and RAB7 [12, 13]. Concurrently, other canonical organelle markers such as the  
88 mannose-6-phosphate receptor are excluded [14].

89 A unique feature of STM among intravacuolar bacteria is the formation of a diverse array of  
90 long tubular structures, *Salmonella*-induced tubules (SIT) [15]. These include the LAMP-  
91 decorated *Salmonella*-induced filaments (SIF), the first SIT discovered [16, 17]. Moreover, SIF  
92 have been structurally characterized, revealing the presence of a double membrane tubular  
93 network [18, 19]. The host-derived membranes forming SCV, SIF, and other tubular  
94 compartments are collectively termed *Salmonella*-modified membranes (SMM).

95 The repertoire of bacterial effector proteins necessary for formation of SMM is quite well-  
96 characterized, with the SPI2-T3SS effector protein SifA being the most important factor [20,  
97 21]. However, much less is known about corresponding host factors required for biogenesis of  
98 SMM. One crucial factor in SIF biogenesis is the SifA- and kinesin-interacting protein SKIP  
99 (a.k.a. PLEKHM2). In conjunction with the effectors SifA and PipB2 [22, 23] and the small

18.11.2019

Host factors for SIF formation

100 GTPase ARL8B [24, 25], SKIP mediates kinesin-1 interaction and thus a link to the microtubule  
101 cytoskeleton and organelle motility [26].  
102 Several attempts were made to analyze the interactions of STM with host factors in a systematic  
103 manner. These comprise RNA interference (RNAi) screens aiming at different parts of the STM  
104 infection process. Two genome-scale screens targeted the invasion [27, 28], while three screens  
105 focused on intracellular replication with two sub-genomic screens covering kinases and  
106 corresponding phosphatases, respectively [29, 30], and a genome-wide screen [31].  
107 Additionally, two recent proteomic studies also shed light on interactions of intracellular STM  
108 with host cells. Vorwerk et al. [32] characterized the proteome of late SMM, while Santos et al.  
109 focused on early and maturing SCV [33].  
110 All of these studies identified host factors yet unprecedented in STM pathobiology, and showed  
111 the general value of such systematic approaches. However, none of these approaches targeted  
112 specifically SIF, thus a host-SIF interactome is far from complete. Therefore, we established a  
113 targeted RNAi screen comprising 496 human genes mostly involved in cellular logistics to  
114 identify host factors involved in the formation of SIF. Using stably LAMP1-GFP-transfected  
115 HeLa cells, we performed automated microscopy on a spinning disk confocal microscope  
116 (SDCM) system with time-lapse live cell imaging (LCI) of STM infection, and scored for  
117 altered SIF formation as phenotypic readout. Investigating high-scoring hits of the RNAi  
118 screen, we validated several so far unknown host-SIF interactions by LCI: (i) involvement of  
119 the late endo-/lysosomal soluble *N*-ethylmaleimide-sensitive factor attachment protein receptor  
120 (SNARE) complex and its interaction partners, (ii) interactions of SIF with early secretory  
121 RAB1A/B, (iii) late secretory RAB3A, RAB8A/B, and VAMP2/3/4, and (iv) a connection to  
122 clathrin-coated structures.

18.11.2019

Host factors for SIF formation

## 124 **Results**

### 125 *Setup and evaluation of RNAi screen*

126 We aimed to identify host cell factors that are required for the endosomal remodeling induced  
127 by intracellular STM in a SPI2-T3SS-dependent manner. For this, an RNAi screen was  
128 performed with siRNAs predominantly targeting mammalian genes involved in cellular  
129 logistics and trafficking (75.2% categorized in intracellular transport according to Gene  
130 Ontology terms). This subset of 496 genes was termed ‘Trafficome’ and is listed in Table S1.

131 Such a screen necessitates specific considerations and controls with the major ones described  
132 below, and further experimental issue are detailed in Suppl. Materials.

133 As a phenotypic readout for STM-induced endosomal remodeling, we scored the formation of  
134 SIF in infected cells. SIF show a highly dynamic behavior in their early phase after formation,  
135 with constant elongation and retraction [34, 35]. Thus, in contrast to previous RNAi screens  
136 done by analyzing fixed cells, we decided to perform this screen by LCI in order to obtain  
137 maximal phenotypic information. A previously established HeLa cell line stably transfected  
138 with LAMP1-GFP as the marker for SIF [18] was used as host cell.

139 As controls for STM-induced phenotypes, we used STM wild type (WT), capable in SIF  
140 induction, and an isogenic strain defective in SsaV, a central component of the SPI2-T3SS, and  
141 thus unable to induce SIF formation (Figure 1A). As a control for successful reverse  
142 transfection in general, we analyzed the lethal effect of an siRNA directed against polo-like  
143 kinase 1 (PLK1), a cell cycle control protein. The knockdown of this protein leads initially to a  
144 cell cycle arrest, and ultimately to cell death, as shown in Figure 1B. Besides, a phenotype-  
145 related control was established, i.e. knockdown of a host factor already known as essential for  
146 SIF formation. A host factor directly involved in SIF formation is SKIP [22]. This study already  
147 successfully used SKIP silencing, thus we used an siRNA with the same sequence as control.  
148 Real-time PCR indicated that the siRNA targeting SKIP yielded not a complete but sufficient

18.11.2019

Host factors for SIF formation

149 and significant knockdown with a reduction to ca. 22% (Figure 1C). Transfection with AllStars  
150 siRNA did not affect SIF formation and dynamics over the course of infection (Figure 1D,  
151 Movie 1), while SKIP knockdown abolished SIF formation (Figure 1D, Movie 2) and reduced  
152 intracellular replication of STM. Though this does not completely exclude off-target effects,  
153 the phenotypic/visual control showed at least the intended purpose of this siRNA being fulfilled.  
154 The partial knockdown explains the rare appearance of SIF. Taken together, the establishment  
155 of the proper controls allowed us the execution of a larger scale RNAi screen.

### 156 *The RNAi trafficome screen*

157 The complete workflow of the RNAi screen executed is summarized in Figure 2. First, siRNAs  
158 were automatically spotted onto 96-well plates. Additionally, each plate contained siAllStars,  
159 siPLK1, and siSKIP as negative and positive siRNA controls, and as phenotype-specific  
160 control, respectively. HeLa-LAMP1-GFP cells were seeded onto siRNAs for reverse  
161 transfection, incubated for 72 h, and subsequently infected with mCherry-labelled STM WT or  
162 *ssaV*. The formation of SIF was followed by LCI using an SDCM from 1-7 h post infection  
163 (p.i.) with hourly intervals.

164 We set out to execute the analysis by visual inspection following the example of Stein et al.  
165 [20], who performed a mutant library screen to identify bacterial factors involved in SIF  
166 formation. As the dynamic nature of SIF and phenotypic heterogeneity in the cellular context  
167 excluded fully automated analysis, we decided to perform the analysis by visual inspections  
168 and used a MATLAB-based tool named SifScreen to support data input and collection (Figure  
169 2). This tool queried the presence of SIF in the examined field of view as the main feature in a  
170 binary manner (for detailed information see Suppl. Material).

171 Since siRNA silencing usually does not yield 100% loss of function, we did not expect a  
172 complete lack of SIF in each of the eight images per well. Furthermore, since a considerable  
173 number of cells were present per image (roughly 10-30 cells, depending on applied siRNA and  
174 position on plate) a single SIF-forming cell would have prompted a SIF-positive scoring, even



18.11.2019

Host factors for SIF formation

175 if generally a SIF-negative knockdown might have occurred. Thus, we decided to define an  
176 overall SIF-abolishing hit with a comparably high cutoff of 50%, i.e. if less than 50% of the  
177 images showed SIF. However, this did not take into consideration knockdowns possibly  
178 affecting cell viability in general or other circumstances compromising the analysis. Since these  
179 parameters were also queried by SifScreen, this allowed us to differentiate between ‘true hits’  
180 and ‘possible hits,’ scoring the former and latter with values of 3 and 1, respectively.  
181 Additionally, to avoid a possible bias due to visual analysis, each screening plate was analyzed  
182 independently by two investigators. With the screen performed in biological triplicates, we  
183 subsequently compiled all scoring data for each host target, also pooling the results of the three  
184 individual siRNAs per target. This resulted in a list of final hits shown in Table S2, in which  
185 hits with a cumulative scoring of 1-4, 5-7, or  $\geq 8$  were classified as low-, mid- and high-ranking  
186 hits, respectively.

187 Approximately 81% (404 of 496) of the trafficone targets scored to varying degrees positive,  
188 underlining the general importance of trafficking processes for SIF formation. Table 1 shows  
189 selected high-ranking hits involved in trafficking and cytoskeleton biology. These hits clearly  
190 show the involvement of all protein classes necessary for the vesicle budding and fusion  
191 machinery, the core of cellular trafficking. These comprise: (i) small GTPases, especially Rab  
192 GTPases, as primary regulators [36-38]; (ii) vesicle coats and their adaptors as cargo and  
193 budding mediators [39-43]; (iii) cytoskeleton components as the basis for vesicle motility [44];  
194 (iv) tethering factors as part of the fusion specification [45, 46]; (v) SNAREs as the primary  
195 fusion agents [45, 47, 48]. Besides, this list includes hits of diverse subcellular origin,  
196 encompassing the complete secretory and endo-/lysosomal system, i.e. endoplasmic reticulum  
197 (ER), Golgi apparatus, endo-/lysosomes. Supporting these allocations, the interaction network  
198 of the hits from Table 1 shows several distinct clusters (Figure 3). Two of them are connected  
199 to cytoskeleton biology (also interconnected if lower-ranking hits are included, data not shown).  
200 Another cluster is SNARE-centered, including RAB1A with RAB11A as a node between this

18.11.2019

Host factors for SIF formation

201 cluster and one of the cytoskeleton-related clusters. Lastly, one cluster is associated with COPI  
202 and clathrin-coated vesicles (CCVs). Collectively, the overall results of the trafficome screen  
203 confirm the general importance of host trafficking factors in SIF biogenesis, indicating a crucial  
204 role for a plethora of as yet unprecedented factors in STM pathobiology.

205 *Validation of selected hits*

206 To test the validity of our approach and the resulting hits, we focused on a subset of genes due  
207 to their presence in the noticeable interaction clusters depicted in Figure 3, or prior reports on  
208 involvement in STM pathobiology. HGS was chosen due to being the highest-ranking hit (Table  
209 S2) and the interaction of SPI1-T3SS effector SopB with endosomal sorting complex required  
210 for transport (ESCRT) complexes previously reported [49] with HGS being part of the ESCRT-  
211 0 complex. Furthermore, RAB1A and RAB11A were included as the highest-ranking Rab  
212 GTPases with RAB11A previously being shown to colocalize with SCV as well as SIF [32,  
213 50]. Consistently, RAB7A served as another well-established SCV- and SIF-localizing control  
214 [12, 50-52]. STX5, STX7, VAMP7, and VAMP8 were chosen due to being the highest-ranking  
215 SNAREs (except VAMP8 lacking from the trafficome), the colocalization of STX7 with SIF  
216 [50], and the recent reported essential role of VAMP7 in SIF biogenesis [33]. The AAA ATPase  
217 VCP was included as another of the highest-ranking trafficking-related hits and another host  
218 factor already known to be important for proper SCV as well as SIF biogenesis via STM effector  
219 SptP [53]. Finally, the VPS11 core component of the class C core vacuole/endosome tethering  
220 (CORVET) / homotypic fusion and protein sorting (HOPS) group of multisubunit tethering  
221 complexes (MTCs) was chosen due to the HOPS complex functionally bridging RAB7 with  
222 late endo-/lysosomal SNAREs and the recent recognition of its essential role in STM replication  
223 and SCV and SIF biogenesis [54, 55].

224 The success of the siRNA knockdowns was confirmed by RT-PCR with a consistently  
225 significant decrease in mRNA in most cases down to 5-10% compared to control siAllStars  
226 (Figure S1, siSKIP served as the screen-inherent phenotype-specific control). Next, we exactly

18.11.2019

Host factors for SIF formation

227 quantified the reduction of SIF formation due to the silencing of the selected targets (Figure 4).  
228 The *ssaV* mutant strain and the knockdown with siSKIP served as screen-inherent SIF-  
229 abolishing controls. All knockdowns resulted in decreased SIF formation with the reduction  
230 being statistically significant except for siHGS and siSTX5. The siRAB7A had the highest  
231 impact, siVCP the second-highest and the others ranged similar. Thus, the knockdowns of  
232 VAMP7 and VCP meet previous data (even though SIF abolishment regarding VCP depletion  
233 here is less pronounced) [33, 53]. Altogether, the effect on SIF formation demonstrates that our  
234 approach confirms known host factors, but also allows the identification of novel factors to be  
235 crucial for SIF biology.

236 *STM deploys membranes of early and late secretory, late endo-/lysosomal, and clathrin-*  
237 *coated origin in SIF biogenesis*

238 The fact that host factors appear as hits in our screen, clearly indicates a physiologically relevant  
239 role in SIF biogenesis. However, whether this role is by direct interaction or an indirect one  
240 involving several intermittent steps, remains unclear. Thus, we decided to analyze the  
241 localization of selected hits with regard to SIF (Figure 5, Figure 6, Figure 7).

242 For analyses of RAB GTPases (Figure 5), we again used RAB7A as well as RAB9A as positive  
243 controls, both showing a clear colocalization with SIF. Of the several Rab GTPases included in  
244 the trafficome RAB1A showed the highest score (Table S2). RAB1 GTPases are responsible  
245 for anterograde ER-Golgi trafficking [56-59]. Importantly, RAB1A can be functionally  
246 substituted by RAB1B [60, 61] and an STM replication-targeted RNAi screen identified  
247 specifically RAB1B as a hit [31]. Hence, we analyzed the infection-related localization of both  
248 isoforms and detected a partial and a strong colocalization of RAB1A and RAB1B,  
249 respectively, with SIF (Figure 5).

250 Another high-ranking hit with relation to RAB proteins was RAB3GAP2 (Table S2), the non-  
251 catalytic subunit of the RAB3 inactivating GTPase-activating protein (GAP) complex [62].  
252 RAB3 possesses four isoforms in mammals [63] and is involved in regulated exocytosis [64].

18.11.2019

Host factors for SIF formation

253 As neither the catalytic GAP subunit, RAB3GAP1, nor one of the four isoforms were present  
254 in the trafficome, we decided to analyze the localization of RAB3A and found a partial  
255 colocalization with SIF (Figure 5).

256 Besides, a mid-ranking hit was RAB8A (Table S2), a Golgi- and endosome-localized RAB  
257 likewise involved in exocytic processes [65]. Interestingly, its isoform RAB8B was observed  
258 to be excluded from maturing SCVs ( $\leq 3$  h p.i.) [50]. Therefore, we analyzed the localization  
259 of both, RAB8A and RAB8B, and strikingly found a strong colocalization of not only RAB8A  
260 but also RAB8B with SIF (Figure 5).

261 As several RAB proteins participating in the late secretory system/exocytosis seem to play a  
262 role in SIF biogenesis, we additionally analyzed three SNAREs with exocytic roles not present  
263 in the trafficome: VAMP2, VAMP3, and VAMP4 [66-68], with VAMP2 also shown to be  
264 present on early SCV [69]. Apart from that, the presence of the two high-ranking SNARE hits  
265 STX7 and VAMP7 (Table S2) on SIF was previously shown [33, 50]. However, SNAREs, are  
266 part of complexes of usually four proteins participating in membrane fusion and consisting of  
267 a single protein v-SNARE (on the vesicle or incoming membrane) and a ternary t-SNARE  
268 subcomplex (on the target or accepting membrane). VAMP7 is the v-SNARE in the SNARE  
269 complex for heterotypic LE/lysosome fusions with the t-SNAREs STX7, STX8, and VTI1B  
270 [70, 71] being replaced by VAMP8 in homotypic LE fusions [72, 73]. In fact, the presence of  
271 VTI1B and STX8 on early SCV [69, 74] and their role in STM replication [54], as well as the  
272 involvement of VAMP8 in STM invasion were already shown [75]. However, their interaction  
273 with SIF remains unclear, except VAMP8 silencing causing SIF reduction identified here  
274 (Figure 4). Thus, we analyzed the localization of VTI1B, STX8, and VAMP8 using STX7 and  
275 VAMP7 as controls. As shown in Figure 6, we detected prominent association of STX7 and  
276 VAMP7 with SIF, as well as for VAMP2 and VAMP8. Colocalization of VTI1B, STX8,  
277 VAMP3, and VAMP4 with SIF was also observed. However, these SNARE subunits showed  
278 a more heterogeneous distribution, and only a fraction of SIF was positive for these candidates.

18.11.2019

Host factors for SIF formation

279 Notably, both recent proteomic studies [32, 33] and this screen identified AP2A1 as being  
280 present on SMM/SCV or scoring high-ranking (Table S2), respectively. AP2A1 represents one  
281 of the two core subunit isoforms of the canonical AP-2 adaptor complex usually acting in  
282 clathrin-mediated endocytosis (CME) at the plasma membrane [76, 77]. Accordingly, the main  
283 coat determinants implicated in the formation of CCVs were among the high-scoring hits,  
284 including both clathrin light chains, CLTA and CLTB, as well as the conventional heavy chain,  
285 CLTC (Table S2). Thus, we analyzed the localization of CLTA and observed a partial  
286 colocalization with SIF (Figure 7).

287 In conclusion, the colocalization of various host factors involved in cellular transport with SIF  
288 validated the results of the RNAi screen. These proteins are components of SIF tubules and, to  
289 variable extent, required for the formation of SIF. The data also support the highly diverse  
290 origin of host cell membranes involved in SIF formation.

18.11.2019

Host factors for SIF formation

## 292 **Discussion**

293 By applying a targeted RNAi screen, we identified several new host factors required for the  
294 formation of SIF, and partially characterized interactions of host proteins with SMM. Our data  
295 strengthen the involvement of the late endo-/lysosomal SNARE complex, and reveal new  
296 interactions of SIF with RAB1, RAB3, and RAB8 GTPases, exocytic SNAREs, as well as  
297 clathrin-coated structures. The implications of these findings as discussed below are depicted  
298 in Figure 8. Several host trafficome components identified here were previously shown as  
299 involved in infection biology in STM in general, and specifically in SCV and/or SIF biogenesis  
300 including: dynein – DYNC1H1 [78-80], filamin – FLNA [81], myosin II – MYH10 [82],  
301 VPS4A/B [49]. This also holds true for several mid-ranking hits: kinesin-1 – KIF5A/B [22-25,  
302 83], PIKFYVE [84], RAB9A [85, 86], RAB14 [85], SCAMP3 [87].

303 Complementary data were recently provided by two proteomic studies. Our group analyzed the  
304 SMM proteome in the late phase of infection (8 h p.i.) [32] that contained several host proteins  
305 that are mid- or high-ranking hits in this screen (summarized in Table 2, first column). The  
306 colocalization of several of these proteins with SMM was shown by immunostaining or LCI.  
307 Santos et al. [33] determined the proteomes of early and maturing SCV (30 min p.i. and 3 h p.i.,  
308 respectively) again identifying proteins appearing as hits in this screen (see Table 2, second and  
309 third column). Taken together, these data strongly validate the approach deployed here.

310 The approach reported here has a major advantage compared to studies based on organelle  
311 proteomics [32, 33]. Proteomics shown presence or absence of host factors on the organelle of  
312 interest, but a particular role in the biogenesis of this organelle cannot be implied directly. In  
313 our RNAi approach potentially each, or at least each high-ranking hit, points to a role in STM-  
314 induced endosomal remodeling. However, a functional role revealed by RNAi does not  
315 necessarily require colocalization of the host factor with the compartment, because a function  
316 may be mediated indirectly, involving several interacting partners. We analyzed the localization  
317 of selected factors (Figure 5, Figure 6, Figure 7) and found several differences in the host factor

18.11.2019

Host factors for SIF formation

318 sets identified by proteomics or by our approach. Nevertheless, there is a considerable overlap  
319 of host factors identified by both approaches as represented in Table 2.

320 The interaction of microbial pathogens with regulators of the early secretory system, such as  
321 *Legionella* and *Coxiella* with RAB1 [88-90], and *Brucella* with RAB2 [91, 92], is well  
322 established. However, an interaction of STM with the early secretory system, e.g. RAB2A, was  
323 only recently described by proteomic studies [32, 33]. We now expand this interaction by  
324 showing the physiological relevance of RAB1A in SIF formation (Figure 4), as well as the  
325 presence of both RAB1A and RAB1B on SIF (Figure 5). This is in striking contrast to the  
326 previous observation that RAB1A is detrimental to STM replication due to its role in  
327 antibacterial autophagy, which is counteracted by the SPI2-T3SS effectors SseFG [93, 94].  
328 Future work has to clarify this apparent conundrum, at least regarding RAB1A. The direct  
329 association of RAB1A/B with SIF possibly connects several distinct trafficking events. First,  
330 RAB1B was shown to be involved in formation of the COPI vesicle coat, which participates in  
331 *intra*-Golgi and retrograde Golgi-to-ER transport. The formation of COPI is dependent on  
332 RAB1B due to its effector GBF1, which is an activating guanine exchange factor (GEF) of  
333 ARF1, the primary COPI-regulating small GTPase [95-97]. Second, the COPI components  
334 COPA and CPG1 were shown to partly colocalize with SIF [32]. In accordance, our screen  
335 identified the majority of COPI components as mid- or high-ranking hits (ARCN1,  
336 COPA/B1/B2/G1, Table 1 and Figure 3, though ARF1 did not score at all, and GBF1 only low).  
337 Thus, RAB1A and/or RAB1B might represent a physical link between COPI vesicles and SCV  
338 and/or SIF for the redirection of early secretory material as depicted in Figure 8iv.

339 The physical interaction of SIF with COPI vesicles might be, similar to the late endo-/lysosomal  
340 fusion machinery, additionally accompanied by tethering factors and SNAREs. The conserved  
341 oligomeric Golgi (COG) tethering complex was shown to be a RAB1 effector and directly bind  
342 COPI components [98, 99]. Interestingly, all components of the COG present in the trafficome  
343 scored mid- to high-ranking (COG1/2/3/5/7, Table S2). Additionally, COG binds STX5, a



18.11.2019

Host factors for SIF formation

344 SNARE that is part of several ER-Golgi and *intra*-Golgi transport-related SNARE complexes  
345 [100]. These complexes either consist of STX5, GOSR2/GS27/membrin, BET1, SEC22B  
346 [101], or STX5, GOSR1/GS28, BET1, YKT6 [102], or STX5, GOSR1, BET1L/GS15, YKT6  
347 [103]. All of these SNAREs are present in the trafficome, but strikingly only the components  
348 of the first SNARE complex scored all mid- to high-ranking (Table 1 and Table S2). STM  
349 effectors partaking in this interaction might be SseF and SseG, as they were recently shown in  
350 a BioID screen [104] to interact with STX5 and SEC22B, besides PipB2 also interacting with  
351 SEC22B. However, the potential involvements indicated by these collective data remain to be  
352 elucidated.

353 Transport protein particle (TRAPP) complexes I, II, and III were identified as RAB1 GEFs  
354 [105-108], as well as COPII [TRAPPI; 109, 110, 111], and COPI tethers [TRAPP II; 107, 112].  
355 TRAPPI is the core shared by all TRAPP complexes, with II and III processing unique  
356 additional subunits. TRAPPC8, the unique component of TRAPPIII, scored high-ranking.  
357 Other components were not present in this trafficome, except the TRAPPI core subunit  
358 TRAPPC2, which unexpectedly did not score at all (Table S2). So far TRAPPIII is only  
359 characterized to participate in autophagy [108, 113, 114]. Finally, the golgin USO1/p115 scored  
360 mid-ranking (Table S2). It is also a RAB1B effector and COPI and COPII tether [97, 115, 116],  
361 partly in conjunction with COG [117], besides being likewise able to bind STX5 [118]. For  
362 both TRAPP complexes and USO1, a specific role in SIF biogenesis remains to be elucidated.

363 It has already been described that STM, depending on SseF/SseG, recruits to the SCV exocytic  
364 vesicles from the Golgi apparatus destined to the plasma membrane [119]. Which host factors  
365 are involved in this process was unclear, and our work now sheds light on this phenotype by  
366 showing the presence of exocytic RABs, RAB3A, RAB8A, and RAB8B (Figure 5) on SIF, as  
367 well as exocytic SNAREs, i.e. VAMP2, VAMP3, and VAMP4 (Figure 6).

368 Besides their involvement in exocytosis, VAMP4 and VAMP3 are also known to prominently  
369 participate in endosome-to-Golgi transport in conjunction with STX16, VTI1A, and STX6 or



18.11.2019

Host factors for SIF formation

370 STX10 for EEs or LEs, respectively [120, 121]. Although STX6 and STX10 were not included  
371 in the trafficome and STX16 ranked low, VTI1A was a mid-ranking hit (Table S2). The STM-  
372 mediated redirection of LAMP1-containing vesicles from the Golgi apparatus to the early SCV  
373 was shown to involve recruitment of STX6 and VAMP2 via SPI1-T3SS effector SipC [69].  
374 Alternatively, this might happen via SPI2-T3SS effector PipB2 that was identified in the recent  
375 BioID screen as interactor of VAMP2 [104]. Furthermore, in homotypic EE fusion STX16 is  
376 replaced by STX13 [122], and STX13 was previously shown to be present on early SCV [74,  
377 123]. While the exact role of RAB3A and the identity of SNAREs involved remain to be  
378 determined, this might indicate that the interception of secretory vesicles depends on a SNARE  
379 complex comprising a distinct combination of the abovementioned SNAREs as represented in  
380 Figure 8ii.

381 In addition to its exocytic role, RAB8A is involved in recycling processes as indicated by the  
382 localization on tubular recycling endosomes (RE) [124]. This localization depends on several  
383 factors such as RAB8 GEF RAB3IP/RABIN8 (which is also part of the trafficome, though it  
384 ranked low, Table S2), concurrently being an effector of RE master regulator RAB11 [125].  
385 Another factor is the RE-localized MICALL1, which interacts with the dynamin-like ATPases  
386 EHD1 and EHD3 [124, 126, 127]. Interestingly, MICALL1 was identified in an RNAi screen  
387 with focus on STM intracellular replication [31], EHD1 and EHD2 were present in the  
388 proteome of maturing SCV [33], and EHD4 was present in late SMM [32]. Moreover, the  
389 association of the maturing SCV and late SMM with RAB11A/B was shown previously [32,  
390 50], with RAB11A following RAB1A as the second highest-ranking RAB in our screen (Table  
391 S2). RAB8B was not present in our screen, but showed a clear colocalization with SIF. In a  
392 previous screen RAB8B was shown to be excluded from maturing SCV [50], however only  
393 early events up to 3 h p.i. were analyzed. Temporal differences in RAB8B recruitment could  
394 explain these observations. SPI2-T3SS effector SopD2 most likely plays a role in RAB8  
395 recruitment, as it was previously shown to interact with RAB8 [104, 128]. Collectively, these

18.11.2019

Host factors for SIF formation

396 data strongly argue for a continued association of STM not only with exocytic compartments,  
397 but also with recycling compartments at later time points (summarized in Figure 8ii).  
398 Concurrently, a RAB11-to-RAB8 switch might occur on SMM, similar to the RAB5-to-RAB7  
399 and RAB14-to-RAB9 switches, probably involving RAB3IP/RABIN8. However, unlike the  
400 enduring RAB5-to-RAB7 switch and similar to the RAB14-to-RAB9 switch, this seems to  
401 happen repeatedly in a transient manner due to the continued presence of RAB11 on SIF as  
402 with RAB14 [32].

403 The presence on SIF, and/or importance for SIF formation of RAB7, the HOPS complex, STX7,  
404 and VAMP7, as well as the direct fusion of late endo-/lysosomal-like VAMP7-positive vesicles  
405 with the SCV, was shown before [33, 50, 54]. This indicates the involvement of the complete  
406 canonical mammalian late endo-/lysosomal vesicle fusion machinery in SIF biogenesis.  
407 Whether this interaction cascade also employs the canonical STX7, VTI1B, and STX8 was not  
408 fully clarified. Here, we expand this cascade by showing the physiological relevance of STX7  
409 for SIF formation (Figure 4), and the presence of VTI1B and STX8 on SIF (Figure 6, Figure 5)  
410 as depicted in Figure 8iii. This cascade is possibly expanded by the host protein PLEKHM1, as  
411 the recruitment of RAB7 and the HOPS complex by SifA via the host protein PLEKHM1 and  
412 its involvement in SCV biogenesis was recently revealed [55], most likely also being involved  
413 in SIF biogenesis. Taken together, SifA seems to recruit the complete late endo-/lysosomal  
414 fusion machinery. Thus, SifA performs a dual role besides the binding of SKIP and the SIF  
415 mobility connected with it. This is also corroborated by the identification of interactions of SifA  
416 with STX7 and VAMP7 by the recent BioID screen [104]. Alternatively or in addition, SopD2  
417 might be likewise involved as it was also shown to interact with STX7 and VAMP7 besides  
418 VTI1B in the same study.

419 Data on involvement of clathrin-coated structures or adaptor protein complexes in infection  
420 processes of intracellular bacterial pathogens are scarce. The usurpation of CME during the  
421 internalization/invasion process is only recently being recognized to be employed by several

18.11.2019

Host factors for SIF formation

422 bacteria, best studied in *Listeria monocytogenes* infection [129, 130]. However, only one study  
423 on *Brucella abortus*, a pathogen also residing in a vacuole during intracellular lifestyle,  
424 demonstrated the association of clathrin with the *Brucella*-containing vacuole [131]. We now  
425 show such an association with CLTA also for STM (Figure 7). It is peculiar that proteomics, as  
426 well as our screen, indicate an involvement of the AP-2 complex, but one of the other adaptor  
427 complexes. This is noteworthy due to the CME-related AP-2 being primarily plasma  
428 membrane-localized, in contrast to the Golgi traffic-related AP-1 and AP-4, or the endo-  
429 /lysosomal traffic-related AP-3 and AP-5 [43]. Especially AP-3 deserves detailed analyses  
430 since its two core subunit isoforms scored in mid- and high-ranking range (AP3B1 and AP3D1,  
431 Table S2, see Figure 8i). An interaction of AP-3 with VAMP7 in mammalian cells [132-134],  
432 as well as an interaction with the complete late endo-/lysosomal SNARE complex in  
433 *Dictyostelium discoideum* was previously shown [135]. Several SPI2-T3SS effectors, i.e.  
434 PipB2, SopD2, and SseG, might participate in such a recruitment because a recent BioID screen  
435 revealed interaction with various AP-2 and AP-3 core subunits [104]. However, examination  
436 of other AP complexes also seems worthwhile, since the latter study indicates interactions with  
437 several of them and the trafficome screen did not comprehensively cover AP complex.

438 In summary, we successfully employed a sub-genomic RNAi screen to systematically identify  
439 new host factors, corresponding protein complexes, and pathways involved in SIF formation.  
440 By providing physiologically relevant data regarding SIF formation, this work further  
441 corroborates the promiscuous origin of SMM indicated by previous proteomics studies [32, 33].  
442 Similar future screens can also reveal the biogenesis of several other SIT [15], and extend to  
443 the host cell types important for *Salmonella* pathogenesis.

444

#### 445 *Acknowledgements*

446 We thank Monika Nietschke and Ursula Krehe for construction of plasmids and technical  
447 assistance. Special thanks go to Markus C. Kerr (Brisbane), André P. Mäurer, and Thomas F.

18.11.2019

Host factors for SIF formation

448 Meyer (Berlin) for advice and logistics in setting up the screen. We thank Martin Aepfelbacher  
449 (Hamburg), Thierry Galli (Paris), Wanjin Hong (Singapore), and Yulong Li (Beijing) for  
450 providing transfection vectors, and acknowledge DNASU und Addgene for provision of  
451 materials.

18.11.2019

Host factors for SIF formation

## 453 **Materials and Methods**

### 454 *Bacterial strains and growth conditions*

455 For infection STM NCTC 12023 WT and isogenic SPI2-T3SS-defective strain P2D6 harboring  
456 plasmid pFPV-mCherry/2 or isogenic GFP-expressing MvP1897 were used (for details see  
457 Table S6). Strains were routinely grown in Luria-Bertani (LB) broth (Difco, BD, Heidelberg,  
458 Germany) containing 50 µg/mL carbenicillin for plasmid selection at 37 °C with aeration.

### 459 *Cell lines and cell culture*

460 Experiments were performed using the parental HeLa cell line (ATCC No. CCL-2) or the  
461 lentivirus-transfected HeLa cell line stably expressing LAMP1-GFP [18]. Cells were routinely  
462 cultured in Dulbecco's modified Eagle's medium (DMEM) containing 4.5 g/L glucose, 4 mM  
463 stable glutamine, and sodium pyruvate (Biochrom, Berlin, Germany) supplemented with 10%  
464 inactivated fetal calf serum (iFCS; Gibco, Darmstadt, Germany) in an atmosphere of 5% CO<sub>2</sub>  
465 and 90% humidity at 37 °C.

### 466 *siRNA library and individual siRNAs*

467 The siRNA library used comprised siRNAs targeting 496 host proteins mostly involved in  
468 intracellular trafficking (but also other processes such as metabolism) with a threefold coverage.  
469 The siRNAs were part of a human whole-genome library obtained from Qiagen (Hilden,  
470 Germany) deposited at the Max Planck Institute for Infection Biology (Berlin, Germany). A  
471 volume of 4 µL of each siRNA (0.2 µM, end concentration of 5.2 nM) was spotted  
472 automatically onto 96-well Clear Bottom Black Cell Culture Microplates (Corning, Corning,  
473 NY, USA) and frozen at -20 °C before transfer. Additionally, each plate contained the same  
474 amount of the following siRNAs from Qiagen as knockdown controls: AllStars as negative and  
475 Hs\_PLK1\_7 (directed against the cell cycle protein polo-like kinase 1) as positive controls. A  
476 custom siRNA from Qiagen directed against SKIP served as a phenotype-specific control [22]

18.11.2019

Host factors for SIF formation

477 and was spotted on location. Information including target sequences for these siRNAs, as well  
478 as those ordered for validation experiments, are listed in Table S7.

479 *Reverse transfection with siRNA*

480 If not using 96-well screening plates as detailed above, the amount for an end concentration of  
481 5 nM siRNA was spotted onto standard cell culture 6-well plates (for mRNA extraction, TPP,  
482 Trasadingen, Switzerland) or 8-well polymer bottom chamber slides (for quantification of SIF  
483 formation,  $\mu$ -Slides, ibidi, Martinsried, Germany).

484 Next, a mixture of the transfection reagent HiPerFect (Qiagen, Hilden, Germany) and serum-  
485 free cell culture medium was applied and this was incubated for 5-10 min at room temperature  
486 (RT). Subsequently, 5,000, 125,000, or 20,000 cells per well of 96-well plates, 6-well plates,  
487 or 8-well chamber slides, respectively, were added in serum-containing medium and incubated  
488 for 72 h at 37 °C in a humidified atmosphere containing 5% CO<sub>2</sub>.

489 *Gene expression quantification*

490 After reverse transfection with different siRNAs total RNA of cells was extracted using the  
491 RNeasy Mini Kit following the manufacturer's instructions (Qiagen, Hilden, Germany).  
492 Homogenization during extraction was performed using Qiagen QIAshredder columns. Then,  
493 1  $\mu$ g of RNA digested with DNaseI (NEB, Frankfurt a. M., Germany) was used for reverse  
494 transcription of mRNA with the RevertAid First Strand cDNA Synthesis Kit (Thermo  
495 Scientific, Dreieich, Germany) following the manufacturer's instructions using the Oligo(dT)<sub>18</sub>  
496 primer. For RT-PCR 1  $\mu$ L of cDNA was used with the Thermo Scientific Maxima SYBR  
497 Green/Fluorescein qPCR Master Mix (2x). As reference gene the housekeeping gene *GAPDH*  
498 was selected [136]. For control of individual host factor knockdowns primers were used  
499 employing the PrimerBank database [137, 138]. Primers for those as well as *GAPDH* are listed  
500 in Table S8. Primer concentration was 150 nM each, and primer efficiency was determined for  
501 each primer pair. RT-PCR was performed in an iCycler instrument (Bio-Rad, Munich,

18.11.2019

Host factors for SIF formation

502 Germany) in triplicates in 96-well plates. Relative expression was determined using the  $2^{-\Delta Ct}$   
503 method [84, 139] with *GAPDH* expression set as 100%. Results were plotted using SigmaPlot  
504 11 (Systat Software, Erkrath, Germany).

#### 505 *Construction of plasmids*

506 Plasmids used in this study were either obtained from Addgene, kind gifts from various  
507 laboratories, or cloned by Gibson Assembly or restriction enzyme digests and are listed in Table  
508 S6. Oligonucleotides for the construction of plasmids encoding host proteins fused to mRuby2  
509 or EGFP are listed in Table S8. First, N- or C-terminal mRuby2 vectors were cloned. For that,  
510 the vectors pEGFP-C1 and pEGFP-N1 were amplified and EGFP was exchanged for a fragment  
511 encoding mRuby2. Genes encoding host proteins were amplified from vectors obtained from  
512 DNASU (Table S6) and then inserted into mRuby2 vectors by Gibson Assembly. Plasmids  
513 encoding host proteins fused to EGFP were constructed using restriction enzyme digests. The  
514 vector pEGFP-C3 was digested with *KpnI* and *XbaI* or *KpnI* and *BamHI* and the larger fragment  
515 was recovered. The inserts were treated the same way and fragments were ligated.

#### 516 *Host cell transfection*

517 For LCI for localization of host factors, HeLa or HeLa-LAMP1-GFP cells were seeded 1 d prior  
518 to transfection. About 20.000 or 150.000 cells were seeded in 8-well chamber slides (see above)  
519 or 3.5 mm glass bottom dishes (FluoroDish, WPI, Berlin, Germany), respectively. For  
520 transfection 0.5 or 2  $\mu$ g of plasmid DNA in 25 or 200  $\mu$ L serum-free medium were mixed with  
521 1 or 4  $\mu$ L of FuGENE HD transfection reagent (DNA to reagent ratio of 1:2, Promega,  
522 Mannheim, Germany) and incubated for 10 min at RT. Medium on the cells was changed and  
523 transfection mixture applied. Cells were incubated for at least 18 h before infection with  
524 medium change during infection. For a complete list of transfection plasmids, see Table S6.

#### 525 *Infection experiments*

18.11.2019

Host factors for SIF formation

526 Overnight cultures of STM were diluted 1:31 and grown for additional 3.5 h in LB broth in  
527 glass test tubes with agitation in a roller drum. HeLa cells were infected with STM WT or *ssaV*  
528 for screening approaches in 96-well plates with a multiplicity of infection (MOI) of 15,  
529 otherwise for colocalization analysis or SIF quantification in 8-well chamber slides or  
530 FluoroDishes with an MOI of 75 or 50, respectively. Infection only of 96-well plates was  
531 synchronized by centrifugation at 500 x g for 5 min, and in all cases proceeded for 25 min at  
532 37 °C in a humidified atmosphere containing 5% CO<sub>2</sub>. Cells were washed thrice with full  
533 medium or PBS for screening or non-screen LCI purposes, respectively, and incubated in full  
534 medium containing 100 µg/mL gentamicin for 1 h to eliminate extracellular bacteria. Then  
535 medium containing 10 µg/mL gentamicin was applied for the remainder of the experiment.

#### 536 *Live cell imaging*

537 For LCI full medium was replaced by imaging medium consisting of Minimal Essential  
538 Medium (MEM) with Earle's salts, without NaHCO<sub>3</sub>, without L-glutamine and without phenol  
539 red (Biochrom, Berlin, Germany) supplemented with 30 mM HEPES (4-(2-hydroxyethyl)-1-  
540 piperazineethanesulfonic acid) (Sigma-Aldrich, Taufkirchen, Germany), pH 7.4, containing  
541 10 µg/mL gentamicin. Fluorescence imaging for screening purposes was performed using a  
542 Zeiss Cell Observer microscope with Yokogawa Spinning Disk Unit CSU-X1 (Carl Zeiss,  
543 Göttingen, Germany), Evolve 512 x 512 EMCCD camera (Photometrics, Tucson, AZ, USA),  
544 automated PZ-2000 stage (Applied Scientific Instrumentation, Eugene, OR, USA), and  
545 infrared-based focus system Definite Focus, operated by Zeiss ZEN 2012 software (blue  
546 edition). The microscope was equipped with live cell periphery consisting of a custom-made  
547 incubation chamber surrounding the microscope body and connected with "The Cube" heating  
548 unit (Life Imaging Services, Basel, Switzerland) maintaining 37 °C and the Incubation System  
549 S for CO<sub>2</sub> and humidity supply (PeCon, Erbach, Germany). Images were acquired using the  
550 Zeiss LD Plan-Neofluar 40x/0.6 Corr air objective (with bottom thickness correction ring). For  
551 acquisition of GFP and mCherry BP 525/50 (Zeiss) and LP 580 (Olympus, Hamburg,



18.11.2019

Host factors for SIF formation

552 Germany) filters, respectively, were applied. All images obtained were processed by the ZEN  
553 software. Non-screen LCI was performed using a Leica SP5 confocal laser-scanning  
554 microscope (CLSM) operated by Leica LAS AF software. The microscope was also equipped  
555 with live cell periphery consisting of ‘The Box’ incubation chamber (Life Imaging Services,  
556 Basel, Switzerland), a custom-made heating unit and a gas supply unit ‘The Brick’. Images  
557 were acquired using the HCX PL APO CS 100x/1.4 oil objective (Leica, Wetzlar, Germany),  
558 applying the polychroic mirror TD 488/543/633 for acquisition of GFP and mCherry. All  
559 images were processed by LAS AF software.

#### 560 *Quantification of SIF formation*

561 After siRNA knockdown and infection, 100 infected HeLa-LAMP1-GFP cells per condition  
562 were examined live from 6-8 h p.i. for presence of SIF as exhibited by WT-infected cells, and  
563 percentage calculated. Results from biological triplicates were plotted using SigmaPlot 11.

#### 564 *Data analysis*

565 For central entry and collection of scoring data, the MATLAB-based utility SifScreen was used.  
566 Categorization of targets/hits was executed using the Gene Ontology classification scheme  
567 [140, 141]. For visualization of protein interactions, the STRING v10 database with default  
568 settings was applied [142].

## 570 References

- 571 1. LaRock DL, Chaudhary A, Miller SI. Salmonellae interactions with host processes. Nat  
572 Rev Microbiol. 2015;13(4):191-205. doi: 10.1038/nrmicro3420. PubMed PMID: 25749450.
- 573 2. Galan JE, Curtiss R. Cloning and molecular characterization of genes whose products  
574 allow *Salmonella typhimurium* to penetrate tissue culture cells. Proc Natl Acad Sci USA.  
575 1989;86:6383-7.
- 576 3. Ramos-Morales F. Impact of *Salmonella enterica* Type III Secretion System Effectors  
577 on the Eukaryotic Host Cell. ISRN Cell Biology. 2012;2012. doi: 10.5402/2012/787934.
- 578 4. Shea JE, Hensel M, Gleeson C, Holden DW. Identification of a virulence locus encoding  
579 a second type III secretion system in *Salmonella typhimurium*. Proc Natl Acad Sci U S A.  
580 1996;93(6):2593-7.
- 581 5. Ochman H, Soncini FC, Solomon F, Groisman EA. Identification of a pathogenicity  
582 island required for *Salmonella* survival in host cells. Proc Natl Acad Sci U S A. 1996;93:7800-4.
- 583 6. Figueira R, Holden DW. Functions of the *Salmonella* pathogenicity island 2 (SPI-2)  
584 type III secretion system effectors. Microbiology. 2012;158(Pt 5):1147-61. Epub 2012/03/17.  
585 doi: mic.0.058115-0 [pii]  
586 10.1099/mic.0.058115-0. PubMed PMID: 22422755.
- 587 7. Steele-Mortimer O, Meresse S, Gorvel JP, Toh BH, Finlay BB. Biogenesis of  
588 *Salmonella typhimurium*-containing vacuoles in epithelial cells involves interactions with the  
589 early endocytic pathway. Cell Microbiol. 1999;1(1):33-49.
- 590 8. Mukherjee K, Siddiqi SA, Hashim S, Raje M, Basu SK, Mukhopadhyay A. Live  
591 Salmonella recruits N-ethylmaleimide-sensitive fusion protein on phagosomal membrane and  
592 promotes fusion with early endosome. J Cell Biol. 2000;148(4):741-53.
- 593 9. Mills SD, Finlay BB. Comparison of *Salmonella typhi* and *Salmonella typhimurium*  
594 invasion, intracellular growth and localization in cultured human epithelial cells.  
595 MicrobPathog. 1994;17:409-23.
- 596 10. Oh YK, Alpuche-Aranda C, Berthiaume E, Jinks T, Miller SI, Swanson JA. Rapid and  
597 complete fusion of macrophage lysosomes with phagosomes containing *Salmonella*  
598 *typhimurium*. Infect Immun. 1996;64(9):3877-83. Epub 1996/09/01. PubMed PMID: 8751942;  
599 PubMed Central PMCID: PMC174306.
- 600 11. Garcia-del Portillo F, Zwick MB, Leung KY, Finlay BB. Intracellular replication of  
601 *Salmonella* within epithelial cells is associated with filamentous structures containing  
602 lysosomal membrane glycoproteins. Infect Agents Dis. 1993;2(4):227-31.
- 603 12. Meresse S, Steele-Mortimer O, Finlay BB, Gorvel JP. The rab7 GTPase controls the  
604 maturation of *Salmonella typhimurium*-containing vacuoles in HeLa cells. EMBO J.  
605 1999;18(16):4394-403.
- 606 13. Brumell JH, Tang P, Mills SD, Finlay BB. Characterization of *Salmonella*-induced  
607 filaments (Sifs) reveals a delayed interaction between *Salmonella*-containing vacuoles and late  
608 endocytic compartments. Traffic. 2001;2(9):643-53. PubMed PMID: 11555418.
- 609 14. Garcia-del Portillo F, Finlay BB. Targeting of *Salmonella typhimurium* to vesicles  
610 containing lysosomal membrane glycoproteins bypasses compartments with mannose 6-  
611 phosphate receptors. J Cell Biol. 1995;129(1):81-97.
- 612 15. Schroeder N, Mota LJ, Meresse S. *Salmonella*-induced tubular networks. Trends  
613 Microbiol. 2011;19(6):268-77. Epub 2011/03/01. doi: 10.1016/j.tim.2011.01.006. PubMed  
614 PMID: 21353564.
- 615 16. Garcia-del Portillo F, Zwick MB, Leung KY, Finlay BB. *Salmonella* induces the  
616 formation of filamentous structures containing lysosomal membrane glycoproteins in epithelial  
617 cells. Proc Natl Acad Sci U S A. 1993;90(22):10544-8. PubMed PMID: 8248143.

18.11.2019

Host factors for SIF formation

- 618 17. Knuff K, Finlay BB. What the SIF is happening - The role of intracellular *Salmonella*-  
619 induced filaments. *Front Cell Infect Microbiol.* 2017;7:335. doi: 10.3389/fcimb.2017.00335.  
620 PubMed PMID: 28791257; PubMed Central PMCID: PMC5524675.
- 621 18. Krieger V, Liebl D, Zhang Y, Rajashekar R, Chlanda P, Giesker K, et al. Reorganization  
622 of the endosomal system in *Salmonella*-infected cells: the ultrastructure of *Salmonella*-induced  
623 tubular compartments. *PLoS Pathog.* 2014;10(9):e1004374. doi:  
624 10.1371/journal.ppat.1004374. PubMed PMID: 25254663.
- 625 19. Liss V, Hensel M. Take the tube: remodelling of the endosomal system by intracellular  
626 *Salmonella enterica*. *Cell Microbiol.* 2015;17(5):639-47. doi: 10.1111/cmi.12441. PubMed  
627 PMID: 25802001.
- 628 20. Stein MA, Leung KY, Zwick M, Garcia-del Portillo F, Finlay BB. Identification of a  
629 *Salmonella* virulence gene required for formation of filamentous structures containing  
630 lysosomal membrane glycoproteins within epithelial cells. *Mol Microbiol.* 1996;20(1):151-64.  
631 PubMed PMID: 8861213.
- 632 21. Zhao W, Moest T, Zhao Y, Guilhon AA, Buffat C, Gorvel JP, et al. The *Salmonella*  
633 effector protein SifA plays a dual role in virulence. *Sci Rep.* 2015;5:12979. doi:  
634 10.1038/srep12979. PubMed PMID: 26268777; PubMed Central PMCID: PMC4534788.
- 635 22. Boucrot E, Henry T, Borg JP, Gorvel JP, Meresse S. The intracellular fate of *Salmonella*  
636 depends on the recruitment of kinesin. *Science.* 2005;308(5725):1174-8.
- 637 23. Henry T, Couillault C, Rockenfeller P, Boucrot E, Dumont A, Schroeder N, et al. The  
638 *Salmonella* effector protein PipB2 is a linker for kinesin-1. *Proc Natl Acad Sci U S A.*  
639 2006;103(36):13497-502.
- 640 24. Kaniuk NA, Canadien V, Bagshaw RD, Bakowski M, Braun V, Landekic M, et al.  
641 *Salmonella* exploits Arl8B-directed kinesin activity to promote endosome tubulation and cell-  
642 to-cell transfer. *Cell Microbiol.* 2011;13(11):1812-23. Epub 2011/08/10. doi: 10.1111/j.1462-  
643 5822.2011.01663.x. PubMed PMID: 21824248.
- 644 25. Rosa-Ferreira C, Munro S. Arl8 and SKIP act together to link lysosomes to kinesin-1.  
645 *Dev Cell.* 2011;21(6):1171-8. doi: 10.1016/j.devcel.2011.10.007. PubMed PMID: 22172677;  
646 PubMed Central PMCID: PMC3240744.
- 647 26. Leone P, Meresse S. Kinesin regulation by *Salmonella*. *Virulence.* 2011;2(1):63-6. Epub  
648 2011/01/11. doi: 14603 [pii]. PubMed PMID: 21217202.
- 649 27. Misselwitz B, Dilling S, Vonaesch P, Sacher R, Snijder B, Schlumberger M, et al. RNAi  
650 screen of *Salmonella* invasion shows role of COPI in membrane targeting of cholesterol and  
651 Cdc42. *Mol Syst Biol.* 2011;7:474. Epub 2011/03/17. doi: 10.1038/msb.2011.7. PubMed  
652 PMID: 21407211.
- 653 28. Thornbrough JM, Gopinath A, Hundley T, Worley MJ. Human genome-wide RNAi  
654 screen for host factors that facilitate *Salmonella* invasion reveals a role for potassium secretion  
655 in promoting internalization. *PLoS One.* 2016;11(11):e0166916. doi:  
656 10.1371/journal.pone.0166916. PubMed PMID: 27880807; PubMed Central PMCID:  
657 PMC5120809.
- 658 29. Kuijl C, Savage ND, Marsman M, Tuin AW, Janssen L, Egan DA, et al. Intracellular  
659 bacterial growth is controlled by a kinase network around PKB/AKT1. *Nature.*  
660 2007;450(7170):725-30. Epub 2007/11/30. doi: nature06345 [pii]  
661 10.1038/nature06345. PubMed PMID: 18046412.
- 662 30. Albers HM, Kuijl C, Bakker J, Hendrickx L, Wekker S, Farhou N, et al. Integrating  
663 chemical and genetic silencing strategies to identify host kinase-phosphatase inhibitor networks  
664 that control bacterial infection. *ACS Chem Biol.* 2014;9(2):414-22. doi: 10.1021/cb400421a.  
665 PubMed PMID: 24274083; PubMed Central PMCID: PMC3934374.
- 666 31. Thornbrough JM, Hundley T, Valdivia R, Worley MJ. Human genome-wide RNAi  
667 screen for host factors that modulate intracellular *Salmonella* growth. *PLoS One.*

18.11.2019

Host factors for SIF formation

- 668 2012;7(6):e38097. doi: 10.1371/journal.pone.0038097. PubMed PMID: 22701604; PubMed  
669 Central PMCID: PMCPMC3372477.
- 670 32. Vorwerk S, Krieger V, Deiwick J, Hensel M, Hansmeier N. Proteomes of host cell  
671 membranes modified by intracellular activities of *Salmonella enterica*. Mol Cell Proteomics.  
672 2015;14(1):81-92. doi: 10.1074/mcp.M114.041145. PubMed PMID: 25348832; PubMed  
673 Central PMCID: PMC4288265.
- 674 33. Santos JC, Duchateau M, Fredlund J, Weiner A, Mallet A, Schmitt C, et al. The COPII  
675 complex and lysosomal VAMP7 determine intracellular *Salmonella* localization and growth.  
676 Cell Microbiol. 2015;17(12):1699-720. doi: 10.1111/cmi.12475. PubMed PMID: 26084942.
- 677 34. Drecktrah D, Levine-Wilkinson S, Dam T, Winfree S, Knodler LA, Schroer TA, et al.  
678 Dynamic behavior of *Salmonella*-induced membrane tubules in epithelial cells. Traffic.  
679 2008;9(12):2117-29. Epub 2008/09/13. doi: TRA830 [pii]  
680 10.1111/j.1600-0854.2008.00830.x. PubMed PMID: 18785994.
- 681 35. Rajashekar R, Liebl D, Seitz A, Hensel M. Dynamic remodeling of the endosomal  
682 system during formation of *Salmonella*-induced filaments by intracellular *Salmonella enterica*.  
683 Traffic. 2008;9(12):2100-16. Epub 2008/09/27. doi: TRA821 [pii] 10.1111/j.1600-  
684 0854.2008.00821.x. PubMed PMID: 18817527.
- 685 36. Hutagalung AH, Novick PJ. Role of Rab GTPases in membrane traffic and cell  
686 physiology. Physiol Rev. 2011;91(1):119-49. doi: 10.1152/physrev.00059.2009. PubMed  
687 PMID: 21248164; PubMed Central PMCID: PMCPMC3710122.
- 688 37. Bhui T, Roy JK. Rab proteins: the key regulators of intracellular vesicle transport. Exp  
689 Cell Res. 2014;328(1):1-19. doi: 10.1016/j.yexcr.2014.07.027. PubMed PMID: 25088255.
- 690 38. Wandinger-Ness A, Zerial M. Rab proteins and the compartmentalization of the  
691 endosomal system. Cold Spring Harb Perspect Biol. 2014;6(11):a022616. doi:  
692 10.1101/cshperspect.a022616. PubMed PMID: 25341920; PubMed Central PMCID:  
693 PMCPMC4413231.
- 694 39. Brodsky FM. Diversity of clathrin function: new tricks for an old protein. Annu Rev  
695 Cell Dev Biol. 2012;28:309-36. doi: 10.1146/annurev-cellbio-101011-155716. PubMed PMID:  
696 22831640.
- 697 40. Burd C, Cullen PJ. Retromer: a master conductor of endosome sorting. Cold Spring  
698 Harb Perspect Biol. 2014;6(2). doi: 10.1101/cshperspect.a016774. PubMed PMID: 24492709;  
699 PubMed Central PMCID: PMCPMC3941235.
- 700 41. Popoff V, Adolf F, Brugger B, Wieland F. COPI budding within the Golgi stack. Cold  
701 Spring Harb Perspect Biol. 2011;3(11):a005231. doi: 10.1101/cshperspect.a005231. PubMed  
702 PMID: 21844168; PubMed Central PMCID: PMCPMC3220356.
- 703 42. Lord C, Ferro-Novick S, Miller EA. The highly conserved COPII coat complex sorts  
704 cargo from the endoplasmic reticulum and targets it to the golgi. Cold Spring Harb Perspect  
705 Biol. 2013;5(2). doi: 10.1101/cshperspect.a013367. PubMed PMID: 23378591; PubMed  
706 Central PMCID: PMCPMC3552504.
- 707 43. Park SY, Guo X. Adaptor protein complexes and intracellular transport. Biosci Rep.  
708 2014;34(4). doi: 10.1042/BSR20140069. PubMed PMID: 24975939; PubMed Central PMCID:  
709 PMCPMC4114066.
- 710 44. Anitei M, Hoflack B. Bridging membrane and cytoskeleton dynamics in the secretory  
711 and endocytic pathways. Nat Cell Biol. 2012;14(1):11-9. doi: 10.1038/ncb2409. PubMed  
712 PMID: 22193159.
- 713 45. Hong W, Lev S. Tethering the assembly of SNARE complexes. Trends Cell Biol.  
714 2014;24(1):35-43. doi: 10.1016/j.tcb.2013.09.006. PubMed PMID: 24119662.
- 715 46. Chia PZ, Gleeson PA. Membrane tethering. F1000Prime Rep. 2014;6:74. doi:  
716 10.12703/P6-74. PubMed PMID: 25343031; PubMed Central PMCID: PMCPMC4166942.
- 717 47. Hong W. SNAREs and traffic. Biochim Biophys Acta. 2005;1744(3):493-517. PubMed  
718 PMID: 16038056.



18.11.2019

Host factors for SIF formation

- 719 48. Jahn R, Scheller RH. SNAREs--engines for membrane fusion. *Nat Rev Mol Cell Biol.*  
720 2006;7(9):631-43. doi: 10.1038/nrm2002. PubMed PMID: 16912714.
- 721 49. Dukes JD, Lee H, Hagen R, Reaves BJ, Layton AN, Galyov EE, et al. The secreted  
722 *Salmonella dublin* phosphoinositide phosphatase, SopB, localizes to PtdIns(3)P-containing  
723 endosomes and perturbs normal endosome to lysosome trafficking. *Biochem J.*  
724 2006;395(2):239-47. doi: 10.1042/BJ20051451. PubMed PMID: 16396630; PubMed Central  
725 PMCID: PMCPMC1422764.
- 726 50. Smith AC, Heo WD, Braun V, Jiang X, Macrae C, Casanova JE, et al. A network of  
727 Rab GTPases controls phagosome maturation and is modulated by *Salmonella enterica* serovar  
728 Typhimurium. *J Cell Biol.* 2007;176(3):263-8. Epub 2007/01/31. doi: jcb.200611056 [pii]  
729 10.1083/jcb.200611056. PubMed PMID: 17261845.
- 730 51. Harrison RE, Brumell JH, Khandani A, Bucci C, Scott CC, Jiang X, et al. *Salmonella*  
731 impairs RILP recruitment to Rab7 during maturation of invasion vacuoles. *Mol Biol Cell.*  
732 2004;15:3146-54.
- 733 52. D'Costa VM, Braun V, Landekic M, Shi R, Proteau A, McDonald L, et al. *Salmonella*  
734 Disrupts Host Endocytic Trafficking by SopD2-Mediated Inhibition of Rab7. *Cell Rep.*  
735 2015;12(9):1508-18. Epub 2015/08/25. doi: 10.1016/j.celrep.2015.07.063. PubMed PMID:  
736 26299973.
- 737 53. Humphreys D, Hume PJ, Koronakis V. The *Salmonella* effector SptP dephosphorylates  
738 host AAA+ ATPase VCP to promote development of its intracellular replicative niche. *Cell*  
739 *Host Microbe.* 2009;5(3):225-33. doi: 10.1016/j.chom.2009.01.010. PubMed PMID:  
740 19286132; PubMed Central PMCID: PMC2724103.
- 741 54. Sindhvani A, Arya SB, Kaur H, Jagga D, Tuli A, Sharma M. *Salmonella* exploits the  
742 host endolysosomal tethering factor HOPS complex to promote its intravacuolar replication.  
743 *PLoS Pathog.* 2017;13(10):e1006700. Epub 2017/10/31. doi: 10.1371/journal.ppat.1006700.  
744 PubMed PMID: 29084291; PubMed Central PMCID: PMCPMC5679646.
- 745 55. McEwan DG, Richter B, Claudi B, Wigge C, Wild P, Farhan H, et al. PLEKHM1  
746 regulates *Salmonella*-containing vacuole biogenesis and infection. *Cell Host Microbe.*  
747 2015;17(1):58-71. doi: 10.1016/j.chom.2014.11.011. PubMed PMID: 25500191.
- 748 56. Segev N, Mulholland J, Botstein D. The yeast GTP-binding YPT1 protein and a  
749 mammalian counterpart are associated with the secretion machinery. *Cell.* 1988;52(6):915-24.  
750 PubMed PMID: 3127057.
- 751 57. Bacon RA, Salminen A, Ruohola H, Novick P, Ferro-Novick S. The GTP-binding  
752 protein Ypt1 is required for transport in vitro: the Golgi apparatus is defective in ypt1 mutants.  
753 *J Cell Biol.* 1989;109(3):1015-22. PubMed PMID: 2504726; PubMed Central PMCID:  
754 PMCPMC2115776.
- 755 58. Plutner H, Cox AD, Pind S, Khosravi-Far R, Bourne JR, Schwaninger R, et al. Rab1b  
756 regulates vesicular transport between the endoplasmic reticulum and successive Golgi  
757 compartments. *J Cell Biol.* 1991;115(1):31-43. PubMed PMID: 1918138; PubMed Central  
758 PMCID: PMCPMC2289927.
- 759 59. Tisdale EJ, Bourne JR, Khosravi-Far R, Der CJ, Balch WE. GTP-binding mutants of  
760 rab1 and rab2 are potent inhibitors of vesicular transport from the endoplasmic reticulum to the  
761 Golgi complex. *J Cell Biol.* 1992;119(4):749-61. PubMed PMID: 1429835; PubMed Central  
762 PMCID: PMCPMC2289685.
- 763 60. Mukhopadhyay A, Nieves E, Che FY, Wang J, Jin L, Murray JW, et al. Proteomic  
764 analysis of endocytic vesicles: Rab1a regulates motility of early endocytic vesicles. *J Cell Sci.*  
765 2011;124(Pt 5):765-75. doi: 10.1242/jcs.079020. PubMed PMID: 21303926; PubMed Central  
766 PMCID: PMCPMC3039020.
- 767 61. Mukhopadhyay A, Quiroz JA, Wolkoff AW. Rab1a regulates sorting of early endocytic  
768 vesicles. *Am J Physiol Gastrointest Liver Physiol.* 2014;306(5):G412-24. doi:

18.11.2019

Host factors for SIF formation

- 769 10.1152/ajpgi.00118.2013. PubMed PMID: 24407591; PubMed Central PMCID:  
770 PMCPMC3949023.
- 771 62. Nagano F, Sasaki T, Fukui K, Asakura T, Imazumi K, Takai Y. Molecular cloning and  
772 characterization of the noncatalytic subunit of the Rab3 subfamily-specific GTPase-activating  
773 protein. *J Biol Chem.* 1998;273(38):24781-5. doi: 10.1074/jbc.273.38.24781. PubMed PMID:  
774 9733780.
- 775 63. Touchot N, Chardin P, Tavitian A. Four additional members of the ras gene superfamily  
776 isolated by an oligonucleotide strategy: molecular cloning of YPT-related cDNAs from a rat  
777 brain library. *Proc Natl Acad Sci USA.* 1987;84(23):8210-4. doi: 10.1073/pnas.84.23.8210.  
778 PubMed PMID: 3317403; PubMed Central PMCID: PMCPMC299511.
- 779 64. Schlüter OM, Khvotchev M, Jahn R, Südhof TC. Localization versus function of Rab3  
780 proteins. Evidence for a common regulatory role in controlling fusion. *J Biol Chem.*  
781 2002;277(43):40919-29. doi: 10.1074/jbc.M203704200. PubMed PMID: 12167638.
- 782 65. Huber LA, Pimplikar S, Parton RG, Virta H, Zerial M, Simons K. Rab8, a small GTPase  
783 involved in vesicular traffic between the TGN and the basolateral plasma membrane. *J Cell*  
784 *Biol.* 1993;123(1):35-45. PubMed PMID: 8408203; PubMed Central PMCID:  
785 PMCPMC2119815.
- 786 66. Söllner T, Bennett MK, Whiteheart SW, Scheller RH, Rothman JE. A protein assembly-  
787 disassembly pathway in vitro that may correspond to sequential steps of synaptic vesicle  
788 docking, activation, and fusion. *Cell.* 1993;75(3):409-18. PubMed PMID: 8221884.
- 789 67. Borisovska M, Zhao Y, Tsytsyura Y, Glyvuk N, Takamori S, Matti U, et al. v-SNAREs  
790 control exocytosis of vesicles from priming to fusion. *EMBO J.* 2005;24(12):2114-26. doi:  
791 10.1038/sj.emboj.7600696. PubMed PMID: 15920476; PubMed Central PMCID:  
792 PMCPMC1150890.
- 793 68. Cocucci E, Racchetti G, Rupnik M, Meldolesi J. The regulated exocytosis of  
794 enlargeosomes is mediated by a SNARE machinery that includes VAMP4. *J Cell Sci.*  
795 2008;121(Pt 18):2983-91. doi: 10.1242/jcs.032029. PubMed PMID: 18713833.
- 796 69. Madan R, Rastogi R, Parashuraman S, Mukhopadhyay A. Salmonella acquires  
797 lysosome-associated membrane protein 1 (LAMP1) on phagosomes from Golgi via SipC  
798 protein-mediated recruitment of host Syntaxin6. *J Biol Chem.* 2012;287(8):5574-87. doi:  
799 10.1074/jbc.M111.286120. PubMed PMID: 22190682; PubMed Central PMCID:  
800 PMC3285332.
- 801 70. Bogdanovic A, Bennett N, Kieffer S, Louwagie M, Morio T, Garin J, et al. Syntaxin 7,  
802 syntaxin 8, Vti1 and VAMP7 (vesicle-associated membrane protein 7) form an active SNARE  
803 complex for early macropinocytic compartment fusion in *Dictyostelium discoideum*. *Biochem*  
804 *J.* 2002;368(Pt 1):29-39. doi: 10.1042/BJ20020845. PubMed PMID: 12175335; PubMed  
805 Central PMCID: PMCPMC1222979.
- 806 71. Pryor PR, Mullock BM, Bright NA, Lindsay MR, Gray SR, Richardson SC, et al.  
807 Combinatorial SNARE complexes with VAMP7 or VAMP8 define different late endocytic  
808 fusion events. *EMBO Rep.* 2004;5(6):590-5. doi: 10.1038/sj.embor.7400150. PubMed PMID:  
809 15133481; PubMed Central PMCID: PMCPMC1299070.
- 810 72. Antonin W, Holroyd C, Fasshauer D, Pabst S, Von Mollard GF, Jahn R. A SNARE  
811 complex mediating fusion of late endosomes defines conserved properties of SNARE structure  
812 and function. *EMBO J.* 2000;19(23):6453-64.
- 813 73. Antonin W, Holroyd C, Tikkanen R, Honing S, Jahn R. The R-SNARE  
814 endobrevin/VAMP-8 mediates homotypic fusion of early endosomes and late endosomes. *Mol*  
815 *Biol Cell.* 2000;11(10):3289-98. PubMed PMID: 11029036; PubMed Central PMCID:  
816 PMCPMC14992.
- 817 74. Singh PK, Kapoor A, Lomash RM, Kumar K, Kamerkar SC, Pucadyil TJ, et al.  
818 *Salmonella* SipA mimics a cognate SNARE for host Syntaxin8 to promote fusion with early

18.11.2019

Host factors for SIF formation

- 819 endosomes. *J Cell Biol.* 2018;217(12):4199-214. doi: 10.1083/jcb.201802155. PubMed PMID:  
820 30309979; PubMed Central PMCID: PMC6279372.
- 821 75. Dai S, Zhang Y, Weimbs T, Yaffe MB, Zhou D. Bacteria-generated PtdIns(3)P recruits  
822 VAMP8 to facilitate phagocytosis. *Traffic.* 2007;8(10):1365-74. PubMed PMID: 17645435.
- 823 76. Merrifield CJ, Kaksonen M. Endocytic accessory factors and regulation of clathrin-  
824 mediated endocytosis. *Cold Spring Harb Perspect Biol.* 2014;6(11):a016733. doi:  
825 10.1101/cshperspect.a016733. PubMed PMID: 25280766; PubMed Central PMCID:  
826 PMC64413230.
- 827 77. Traub LM, Bonifacino JS. Cargo recognition in clathrin-mediated endocytosis. *Cold*  
828 *Spring Harb Perspect Biol.* 2013;5(11):a016790. doi: 10.1101/cshperspect.a016790. PubMed  
829 PMID: 24186068; PubMed Central PMCID: PMC3809577.
- 830 78. Marsman M, Jordens I, Kuijl C, Janssen L, Neeffjes J. Dynein-mediated vesicle transport  
831 controls intracellular *Salmonella* replication. *Mol Biol Cell.* 2004;15(6):2954-64.
- 832 79. Abrahams GL, Müller P, Hensel M. Functional dissection of SseF, a type III effector  
833 protein involved in positioning the *Salmonella*-containing vacuole. *Traffic.* 2006;7(8):950-65.
- 834 80. Guignot J, Caron E, Beuzon C, Bucci C, Kagan J, Roy C, et al. Microtubule motors  
835 control membrane dynamics of *Salmonella*-containing vacuoles. *J Cell Sci.* 2004;117:1033-45.
- 836 81. Miao EA, Brittnacher M, Haraga A, Jeng RL, Welch MD, Miller SI. *Salmonella*  
837 effectors translocated across the vacuolar membrane interact with the actin cytoskeleton. *Mol*  
838 *Microbiol.* 2003;48(2):401-15. PubMed PMID: 12675800.
- 839 82. Wasylanka JA, Bakowski MA, Szeto J, Ohlson MB, Trimble WS, Miller SI, et al. Role  
840 for myosin II in regulating positioning of *Salmonella*-containing vacuoles and intracellular  
841 replication. *Infect Immun.* 2008;76(6):2722-35. Epub 2008/04/16. doi: IAI.00152-08 [pii]  
842 10.1128/IAI.00152-08. PubMed PMID: 18411289; PubMed Central PMCID: PMC2423101.
- 843 83. Dumont A, Boucrot E, Drevensek S, Daire V, Gorvel JP, Pous C, et al. SKIP, the host  
844 target of the *Salmonella* virulence factor SifA, promotes kinesin-1-dependent vacuolar  
845 membrane exchanges. *Traffic.* 2010;11(7):899-911. Epub 2010/04/22. doi: TRA1069 [pii]  
846 10.1111/j.1600-0854.2010.01069.x. PubMed PMID: 20406420.
- 847 84. Kerr MC, Wang JT, Castro NA, Hamilton NA, Town L, Brown DL, et al. Inhibition of  
848 the PtdIns(5) kinase PIKfyve disrupts intracellular replication of *Salmonella*. *EMBO J.*  
849 2010;29(8):1331-47. doi: 10.1038/emboj.2010.28. PubMed PMID: 20300065; PubMed Central  
850 PMCID: PMC2868569.
- 851 85. Kuijl C, Pilli M, Alahari SK, Janssen H, Khoo PS, Ervin KE, et al. Rac and Rab GTPases  
852 dual effector Nischarin regulates vesicle maturation to facilitate survival of intracellular  
853 bacteria. *EMBO J.* 2013;32(5):713-27. doi: 10.1038/emboj.2013.10. PubMed PMID:  
854 23386062; PubMed Central PMCID: PMC3590985.
- 855 86. Seixas E, Ramalho JS, Mota LJ, Barral DC, Seabra MC. Bacteria and protozoa  
856 differentially modulate the expression of Rab proteins. *PLoS One.* 2012;7(7):e39858. doi:  
857 10.1371/journal.pone.0039858. PubMed PMID: 22911692; PubMed Central PMCID:  
858 PMC3401185.
- 859 87. Mota LJ, Ramsden AE, Liu M, Castle JD, Holden DW. SCAMP3 is a component of the  
860 *Salmonella*-induced tubular network and reveals an interaction between bacterial effectors and  
861 post-Golgi trafficking. *Cell Microbiol.* 2009;11(8):1236-53. Epub 2009/05/15. doi: CMI1329  
862 [pii]  
863 10.1111/j.1462-5822.2009.01329.x. PubMed PMID: 19438519; PubMed Central PMCID:  
864 PMC2730479.
- 865 88. Campoy EM, Zoppino FC, Colombo MI. The early secretory pathway contributes to the  
866 growth of the *Coxiella*-replicative niche. *Infect Immun.* 2011;79(1):402-13. doi:  
867 10.1128/IAI.00688-10. PubMed PMID: 20937765; PubMed Central PMCID:  
868 PMC3019900.

18.11.2019

Host factors for SIF formation

- 869 89. Kagan JC, Stein MP, Pypaert M, Roy CR. *Legionella* subvert the functions of rab1 and  
870 sec22b to create a replicative organelle. *J Exp Med*. 2004;199(9):1201-11.
- 871 90. Müller MP, Peters H, Blumer J, Blankenfeldt W, Goody RS, Itzen A. The *Legionella*  
872 effector protein DrrA AMPylates the membrane traffic regulator Rab1b. *Science*.  
873 2010;329(5994):946-9. doi: 10.1126/science.1192276. PubMed PMID: 20651120.
- 874 91. Fugier E, Salcedo SP, de Chastellier C, Pophillat M, Muller A, Arce-Gorvel V, et al.  
875 The glyceraldehyde-3-phosphate dehydrogenase and the small GTPase Rab 2 are crucial for  
876 *Brucella* replication. *PLoS Pathog*. 2009;5(6):e1000487. doi: 10.1371/journal.ppat.1000487.  
877 PubMed PMID: 19557163; PubMed Central PMCID: PMCPMC2695806.
- 878 92. de Bolle X, Letesson JJ, Gorvel JP. Small GTPases and *Brucella* entry into the  
879 endoplasmic reticulum. *Biochem Soc Trans*. 2012;40(6):1348-52. doi: 10.1042/BST20120156.  
880 PubMed PMID: 23176479.
- 881 93. Huang J, Birmingham CL, Shahnazari S, Shiu J, Zheng YT, Smith AC, et al.  
882 Antibacterial autophagy occurs at PI(3)P-enriched domains of the endoplasmic reticulum and  
883 requires Rab1 GTPase. *Autophagy*. 2011;7(1):17-26. Epub 2010/10/29. doi: 13840 [pii].  
884 PubMed PMID: 20980813; PubMed Central PMCID: PMC3039730.
- 885 94. Feng ZZ, Jiang AJ, Mao AW, Feng Y, Wang W, Li J, et al. The *Salmonella* effectors  
886 SseF and SseG inhibit Rab1A-mediated autophagy to facilitate intracellular bacterial survival  
887 and replication. *J Biol Chem*. 2018;293(25):9662-73. doi: 10.1074/jbc.M117.811737. PubMed  
888 PMID: 29610274; PubMed Central PMCID: PMCPMC6016468.
- 889 95. Alvarez C, Garcia-Mata R, Brandon E, Sztul E. COPI recruitment is modulated by a  
890 Rab1b-dependent mechanism. *Mol Biol Cell*. 2003;14(5):2116-27. doi: 10.1091/mbc.E02-09-  
891 0625. PubMed PMID: 12802079; PubMed Central PMCID: PMCPMC165101.
- 892 96. Monetta P, Slavin I, Romero N, Alvarez C. Rab1b interacts with GBF1 and modulates  
893 both ARF1 dynamics and COPI association. *Mol Biol Cell*. 2007;18(7):2400-10. doi:  
894 10.1091/mbc.E06-11-1005. PubMed PMID: 17429068; PubMed Central PMCID:  
895 PMCPMC1924811.
- 896 97. Guo Y, Linstedt AD. Binding of the vesicle docking protein p115 to the GTPase Rab1b  
897 regulates membrane recruitment of the COPI vesicle coat. *Cell Logist*. 2013;3:e27687. doi:  
898 10.4161/cl.27687. PubMed PMID: 25332841; PubMed Central PMCID: PMCPMC4187009.
- 899 98. Suvorova ES, Duden R, Lupashin VV. The Sec34/Sec35p complex, a Ypt1p effector  
900 required for retrograde intra-Golgi trafficking, interacts with Golgi SNAREs and COPI vesicle  
901 coat proteins. *J Cell Biol*. 2002;157(4):631-43. doi: 10.1083/jcb.200111081. PubMed PMID:  
902 12011112; PubMed Central PMCID: PMC2173848.
- 903 99. Zolov SN, Lupashin VV. Cog3p depletion blocks vesicle-mediated Golgi retrograde  
904 trafficking in HeLa cells. *J Cell Biol*. 2005;168(5):747-59. doi: 10.1083/jcb.200412003.  
905 PubMed PMID: 15728195; PubMed Central PMCID: PMCPMC2171815.
- 906 100. Shestakova A, Suvorova E, Pavliv O, Khaidakova G, Lupashin V. Interaction of the  
907 conserved oligomeric Golgi complex with t-SNARE Syntaxin5a/Sed5 enhances intra-Golgi  
908 SNARE complex stability. *J Cell Biol*. 2007;179(6):1179-92. doi: 10.1083/jcb.200705145.  
909 PubMed PMID: 18086915; PubMed Central PMCID: PMCPMC2140037.
- 910 101. Xu D, Joglekar AP, Williams AL, Hay JC. Subunit structure of a mammalian ER/Golgi  
911 SNARE complex. *J Biol Chem*. 2000;275(50):39631-9. doi: 10.1074/jbc.M007684200.  
912 PubMed PMID: 11035026.
- 913 102. Zhang T, Hong W. Ykt6 forms a SNARE complex with syntaxin 5, GS28, and Bet1 and  
914 participates in a late stage in endoplasmic reticulum-Golgi transport. *J Biol Chem*.  
915 2001;276(29):27480-7. doi: 10.1074/jbc.M102786200. PubMed PMID: 11323436.
- 916 103. Tai G, Lu L, Wang TL, Tang BL, Goud B, Johannes L, et al. Participation of the syntaxin  
917 5/Ykt6/GS28/GS15 SNARE complex in transport from the early/recycling endosome to the  
918 *trans*-Golgi network. *Mol Biol Cell*. 2004;15(9):4011-22. doi: 10.1091/mbc.E03-12-0876.  
919 PubMed PMID: 15215310; PubMed Central PMCID: PMCPMC515336.



18.11.2019

Host factors for SIF formation

- 920 104. D'Costa VM, Coyaud E, Boddy KC, Laurent EMN, St-Germain J, Li T, et al. BioID  
921 screen of *Salmonella* type 3 secreted effectors reveals host factors involved in vacuole  
922 positioning and stability during infection. *Nat Microbiol.* 2019. doi: 10.1038/s41564-019-0580-  
923 9. PubMed PMID: 31611645.
- 924 105. Sacher M, Barrowman J, Wang W, Horecka J, Zhang Y, Pypaert M, et al. TRAPP I  
925 implicated in the specificity of tethering in ER-to-Golgi transport. *Mol Cell.* 2001;7(2):433-42.  
926 PubMed PMID: 11239471.
- 927 106. Jones S, Newman C, Liu F, Segev N. The TRAPP complex is a nucleotide exchanger  
928 for Ypt1 and Ypt31/32. *Mol Biol Cell.* 2000;11(12):4403-11. PubMed PMID: 11102533;  
929 PubMed Central PMCID: PMCPMC15082.
- 930 107. Yamasaki A, Menon S, Yu S, Barrowman J, Meerloo T, Oorschot V, et al. mTrs130 is  
931 a component of a mammalian TRAPP II complex, a Rab1 GEF that binds to COPI-coated  
932 vesicles. *Mol Biol Cell.* 2009;20(19):4205-15. doi: 10.1091/mbc.E09-05-0387. PubMed PMID:  
933 19656848; PubMed Central PMCID: PMCPMC2754934.
- 934 108. Lynch-Day MA, Bhandari D, Menon S, Huang J, Cai H, Bartholomew CR, et al. Trs85  
935 directs a Ypt1 GEF, TRAPP III, to the phagophore to promote autophagy. *Proc Natl Acad Sci*  
936 *U S A.* 2010;107(17):7811-6. Epub 2010/04/09. doi: 1000063107 [pii]  
937 10.1073/pnas.1000063107. PubMed PMID: 20375281; PubMed Central PMCID:  
938 PMC2867920.
- 939 109. Cai H, Yu S, Menon S, Cai Y, Lazarova D, Fu C, et al. TRAPP I tethers COPII vesicles  
940 by binding the coat subunit Sec23. *Nature.* 2007;445(7130):941-4. doi: 10.1038/nature05527.  
941 PubMed PMID: 17287728.
- 942 110. Yu S, Satoh A, Pypaert M, Mullen K, Hay JC, Ferro-Novick S. mBet3p is required for  
943 homotypic COPII vesicle tethering in mammalian cells. *J Cell Biol.* 2006;174(3):359-68. doi:  
944 10.1083/jcb.200603044. PubMed PMID: 16880271; PubMed Central PMCID:  
945 PMCPMC2064232.
- 946 111. Loh E, Peter F, Subramaniam VN, Hong W. Mammalian Bet3 functions as a cytosolic  
947 factor participating in transport from the ER to the Golgi apparatus. *J Cell Sci.* 2005;118(Pt  
948 6):1209-22. doi: 10.1242/jcs.01723. PubMed PMID: 15728249.
- 949 112. Cai H, Zhang Y, Pypaert M, Walker L, Ferro-Novick S. Mutants in *trs120* disrupt traffic  
950 from the early endosome to the late Golgi. *J Cell Biol.* 2005;171(5):823-33. doi:  
951 10.1083/jcb.200505145. PubMed PMID: 16314430; PubMed Central PMCID:  
952 PMCPMC2171297.
- 953 113. Lamb CA, Nuhlen S, Judith D, Frith D, Snijders AP, Behrends C, et al. TBC1D14  
954 regulates autophagy via the TRAPP complex and ATG9 traffic. *EMBO J.* 2016;35(3):281-301.  
955 doi: 10.15252/embj.201592695. PubMed PMID: 26711178; PubMed Central PMCID:  
956 PMCPMC4741301.
- 957 114. Shirahama-Noda K, Kira S, Yoshimori T, Noda T. TRAPP III is responsible for  
958 vesicular transport from early endosomes to Golgi, facilitating Atg9 cycling in autophagy. *J*  
959 *Cell Sci.* 2013;126(Pt 21):4963-73. doi: 10.1242/jcs.131318. PubMed PMID: 23986483.
- 960 115. Allan BB, Moyer BD, Balch WE. Rab1 recruitment of p115 into a *cis*-SNARE complex:  
961 programming budding COPII vesicles for fusion. *Science.* 2000;289(5478):444-8. PubMed  
962 PMID: 10903204.
- 963 116. Cao X, Ballew N, Barlowe C. Initial docking of ER-derived vesicles requires Uso1p and  
964 Ypt1p but is independent of SNARE proteins. *EMBO J.* 1998;17(8):2156-65. doi:  
965 10.1093/emboj/17.8.2156. PubMed PMID: 9545229; PubMed Central PMCID:  
966 PMCPMC1170560.
- 967 117. Sohda M, Misumi Y, Yoshimura S, Nakamura N, Fusano T, Ogata S, et al. The  
968 interaction of two tethering factors, p115 and COG complex, is required for Golgi integrity.  
969 *Traffic.* 2007;8(3):270-84. doi: 10.1111/j.1600-0854.2006.00530.x. PubMed PMID:  
970 17274799.

18.11.2019

Host factors for SIF formation

- 971 118. Shorter J, Beard MB, Seemann J, Dirac-Svejstrup AB, Warren G. Sequential tethering  
972 of Golgins and catalysis of SNAREpin assembly by the vesicle-tethering protein p115. *J Cell*  
973 *Biol.* 2002;157(1):45-62. doi: 10.1083/jcb.200112127. PubMed PMID: 11927603; PubMed  
974 Central PMCID: PMCPMC2173270.
- 975 119. Kuhle V, Abrahams GL, Hensel M. Intracellular *Salmonella enterica* redirect exocytic  
976 transport processes in a *Salmonella* pathogenicity island 2-dependent manner. *Traffic.*  
977 2006;7(6):716-30.
- 978 120. Mallard F, Tang BL, Galli T, Tenza D, Saint-Pol A, Yue X, et al. Early/recycling  
979 endosomes-to-TGN transport involves two SNARE complexes and a Rab6 isoform. *J Cell Biol.*  
980 2002;156(4):653-64. doi: 10.1083/jcb.200110081. PubMed PMID: 11839770; PubMed Central  
981 PMCID: PMCPMC2174079.
- 982 121. Ganley IG, Espinosa E, Pfeffer SR. A syntaxin 10-SNARE complex distinguishes two  
983 distinct transport routes from endosomes to the trans-Golgi in human cells. *J Cell Biol.*  
984 2008;180(1):159-72. doi: 10.1083/jcb.200707136. PubMed PMID: 18195106; PubMed Central  
985 PMCID: PMCPMC2213607.
- 986 122. Brandhorst D, Zwillig D, Rizzoli SO, Lippert U, Lang T, Jahn R. Homotypic fusion of  
987 early endosomes: SNAREs do not determine fusion specificity. *Proc Natl Acad Sci USA.*  
988 2006;103(8):2701-6. doi: 10.1073/pnas.0511138103. PubMed PMID: 16469845; PubMed  
989 Central PMCID: PMCPMC1413832.
- 990 123. Smith AC, Cirulis JT, Casanova JE, Scidmore MA, Brumell JH. Interaction of the  
991 *Salmonella*-containing vacuole with the endocytic recycling system. *J Biol Chem.*  
992 2005;280(26):24634-41. PubMed PMID: 15886200.
- 993 124. Roland JT, Kenworthy AK, Peranen J, Caplan S, Goldenring JR. Myosin Vb interacts  
994 with Rab8a on a tubular network containing EHD1 and EHD3. *Mol Biol Cell.* 2007;18(8):2828-  
995 37. doi: 10.1091/mbc.E07-02-0169. PubMed PMID: 17507647; PubMed Central PMCID:  
996 PMCPMC1949367.
- 997 125. Knodler A, Feng S, Zhang J, Zhang X, Das A, Peranen J, et al. Coordination of Rab8  
998 and Rab11 in primary ciliogenesis. *Proc Natl Acad Sci U S A.* 2010;107(14):6346-51. doi:  
999 10.1073/pnas.1002401107. PubMed PMID: 20308558; PubMed Central PMCID:  
1000 PMCPMC2851980.
- 1001 126. Rahajeng J, Giridharan SS, Cai B, Naslavsky N, Caplan S. MICAL-L1 is a tubular  
1002 endosomal membrane hub that connects Rab35 and Arf6 with Rab8a. *Traffic.* 2012;13(1):82-  
1003 93. doi: 10.1111/j.1600-0854.2011.01294.x. PubMed PMID: 21951725; PubMed Central  
1004 PMCID: PMCPMC3302426.
- 1005 127. Sharma M, Giridharan SS, Rahajeng J, Naslavsky N, Caplan S. MICAL-L1 links EHD1  
1006 to tubular recycling endosomes and regulates receptor recycling. *Mol Biol Cell.*  
1007 2009;20(24):5181-94. doi: 10.1091/mbc.E09-06-0535. PubMed PMID: 19864458; PubMed  
1008 Central PMCID: PMCPMC2793294.
- 1009 128. Spano S, Gao X, Hannemann S, Lara-Tejero M, Galan JE. A Bacterial Pathogen Targets  
1010 a Host Rab-Family GTPase Defense Pathway with a GAP. *Cell Host Microbe.* 2016;19(2):216-  
1011 26. doi: 10.1016/j.chom.2016.01.004. PubMed PMID: 26867180; PubMed Central PMCID:  
1012 PMCPMC4854434.
- 1013 129. Cossart P, Lebreton A. A trip in the "New Microbiology" with the bacterial pathogen  
1014 *Listeria monocytogenes*. *FEBS Lett.* 2014;588(15):2437-45. doi:  
1015 10.1016/j.febslet.2014.05.051. PubMed PMID: 24911203.
- 1016 130. Pizarro-Cerda J, Kuhbacher A, Cossart P. Entry of *Listeria monocytogenes* in  
1017 mammalian epithelial cells: an updated view. *Cold Spring Harb Perspect Med.* 2012;2(11). doi:  
1018 10.1101/cshperspect.a010009. PubMed PMID: 23125201; PubMed Central PMCID:  
1019 PMCPMC3543101.
- 1020 131. Lee JJ, Kim DG, Kim DH, Simborio HL, Min W, Lee HJ, et al. Interplay between  
1021 clathrin and Rab5 controls the early phagocytic trafficking and intracellular survival of *Brucella*

18.11.2019

Host factors for SIF formation

- 1022 *abortus* within HeLa cells. J Biol Chem. 2013;288(39):28049-57. doi:  
1023 10.1074/jbc.M113.491555. PubMed PMID: 23940042; PubMed Central PMCID:  
1024 PMCPMC3784717.
- 1025 132. Martinez-Arca S, Rudge R, Vacca M, Raposo G, Camonis J, Proux-Gillardeaux V, et  
1026 al. A dual mechanism controlling the localization and function of exocytic v-SNAREs. Proc  
1027 Natl Acad Sci U S A. 2003;100(15):9011-6. doi: 10.1073/pnas.1431910100. PubMed PMID:  
1028 12853575; PubMed Central PMCID: PMCPMC166429.
- 1029 133. Kent HM, Evans PR, Schafer IB, Gray SR, Sanderson CM, Luzio JP, et al. Structural  
1030 basis of the intracellular sorting of the SNARE VAMP7 by the AP3 adaptor complex. Dev Cell.  
1031 2012;22(5):979-88. doi: 10.1016/j.devcel.2012.01.018. PubMed PMID: 22521722; PubMed  
1032 Central PMCID: PMCPMC3549491.
- 1033 134. Salazar G, Craige B, Styers ML, Newell-Litwa KA, Doucette MM, Wainer BH, et al.  
1034 BLOC-1 complex deficiency alters the targeting of adaptor protein complex-3 cargoes. Mol  
1035 Biol Cell. 2006;17(9):4014-26. doi: 10.1091/mbc.E06-02-0103. PubMed PMID: 16760431;  
1036 PubMed Central PMCID: PMCPMC1556383.
- 1037 135. Bennett N, Letourneur F, Ragno M, Louwagie M. Sorting of the v-SNARE VAMP7 in  
1038 Dictyostelium discoideum: a role for more than one Adaptor Protein (AP) complex. Exp Cell  
1039 Res. 2008;314(15):2822-33. doi: 10.1016/j.yexcr.2008.06.019. PubMed PMID: 18634783.
- 1040 136. Vreeburg RA, Bastiaan-Net S, Mes JJ. Normalization genes for quantitative RT-PCR in  
1041 differentiated Caco-2 cells used for food exposure studies. Food Funct. 2011;2(2):124-9. doi:  
1042 10.1039/c0fo00068j. PubMed PMID: 21779557.
- 1043 137. Wang X, Seed B. A PCR primer bank for quantitative gene expression analysis. Nucleic  
1044 Acids Res. 2003;31(24):e154. PubMed PMID: 14654707; PubMed Central PMCID:  
1045 PMCPMC291882.
- 1046 138. Wang X, Spandidos A, Wang H, Seed B. PrimerBank: a PCR primer database for  
1047 quantitative gene expression analysis, 2012 update. Nucleic Acids Res. 2012;40(Database  
1048 issue):D1144-9. doi: 10.1093/nar/gkr1013. PubMed PMID: 22086960; PubMed Central  
1049 PMCID: PMCPMC3245149.
- 1050 139. Town L, McGlenn E, Fiorenza S, Metzis V, Butterfield NC, Richman JM, et al. The  
1051 metalloendopeptidase gene *Pitrm1* is regulated by hedgehog signaling in the developing mouse  
1052 limb and is expressed in muscle progenitors. Dev Dyn. 2009;238(12):3175-84. doi:  
1053 10.1002/dvdy.22126. PubMed PMID: 19877269.
- 1054 140. Ashburner M, Ball CA, Blake JA, Botstein D, Butler H, Cherry JM, et al. Gene  
1055 ontology: tool for the unification of biology. The Gene Ontology Consortium. Nat Genet.  
1056 2000;25(1):25-9. doi: 10.1038/75556. PubMed PMID: 10802651; PubMed Central PMCID:  
1057 PMCPMC3037419.
- 1058 141. Huntley RP, Sawford T, Mutowo-Meullenet P, Shypitsyna A, Bonilla C, Martin MJ, et  
1059 al. The GOA database: gene Ontology annotation updates for 2015. Nucleic Acids Res.  
1060 2015;43(Database issue):D1057-63. doi: 10.1093/nar/gku1113. PubMed PMID: 25378336;  
1061 PubMed Central PMCID: PMCPMC4383930.
- 1062 142. Szklarczyk D, Franceschini A, Wyder S, Forslund K, Heller D, Huerta-Cepas J, et al.  
1063 STRING v10: protein-protein interaction networks, integrated over the tree of life. Nucleic  
1064 Acids Res. 2015;43(Database issue):D447-52. doi: 10.1093/nar/gku1003. PubMed PMID:  
1065 25352553; PubMed Central PMCID: PMCPMC4383874.
- 1066 143. Kehl A, Hensel M. Live cell imaging of intracellular *Salmonella enterica*. Methods Mol  
1067 Biol. 2015;1225:199-225. doi: 10.1007/978-1-4939-1625-2\_13. PubMed PMID: 25253257.
- 1068 144. Zhang Y, Hensel M. Evaluation of nanoparticles as endocytic tracers in cellular  
1069 microbiology. Nanoscale. 2013;5(19):9296-309. doi: 10.1039/c3nr01550e. PubMed PMID:  
1070 23942623.
- 1071 145. Knodler LA, Nair V, Steele-Mortimer O. Quantitative assessment of cytosolic  
1072 *Salmonella* in epithelial cells. PLoS One. 2014;9(1):e84681. doi:

18.11.2019

Host factors for SIF formation

- 1073 10.1371/journal.pone.0084681. PubMed PMID: 24400108; PubMed Central PMCID:  
1074 PMC3882239.
- 1075 146. Lam AJ, St-Pierre F, Gong Y, Marshall JD, Cranfill PJ, Baird MA, et al. Improving  
1076 FRET dynamic range with bright green and red fluorescent proteins. *Nat Methods*.  
1077 2012;9(10):1005-12. doi: 10.1038/nmeth.2171. PubMed PMID: 22961245; PubMed Central  
1078 PMCID: PMC3461113.
- 1079 147. Paumet F, Le Mao J, Martin S, Galli T, David B, Blank U, et al. Soluble NSF attachment  
1080 protein receptors (SNAREs) in RBL-2H3 mast cells: functional role of syntaxin 4 in exocytosis  
1081 and identification of a vesicle-associated membrane protein 8-containing secretory  
1082 compartment. *J Immunol*. 2000;164(11):5850-7. doi: 10.4049/jimmunol.164.11.5850. PubMed  
1083 PMID: 10820264.
- 1084 148. Martinez-Arca S, Alberts P, Zahraoui A, Louvard D, Galli T. Role of tetanus neurotoxin  
1085 insensitive vesicle-associated membrane protein (TI-VAMP) in vesicular transport mediating  
1086 neurite outgrowth. *J Cell Biol*. 2000;149(4):889-900. doi: 10.1083/jcb.149.4.889. PubMed  
1087 PMID: 10811829; PubMed Central PMCID: PMC2174569.
- 1088 149. Itakura E, Kishi-Itakura C, Mizushima N. The hairpin-type tail-anchored SNARE  
1089 syntaxin 17 targets to autophagosomes for fusion with endosomes/lysosomes. *Cell*.  
1090 2012;151(6):1256-69. doi: 10.1016/j.cell.2012.11.001. PubMed PMID: 23217709.

18.11.2019

Host factors for SIF formation

1092 **Tables**

1093 **Table 1.** High-ranking trafficome hits (scoring cutoff of  $\geq 8$ ) involved in trafficking and  
 1094 cytoskeleton biology.

| Gene symbol                                   | Full name <sup>1</sup>                                                         | Localization <sup>2</sup> |
|-----------------------------------------------|--------------------------------------------------------------------------------|---------------------------|
| <b>Small GTPases and interacting proteins</b> |                                                                                |                           |
| <i>Arf family</i>                             |                                                                                |                           |
| ARL1                                          | ADP-ribosylation factor-like 1                                                 | Golgi                     |
| <i>Rab family</i>                             |                                                                                |                           |
| RAB1A                                         | RAB1A, member RAS oncogene family                                              | ER, Golgi, EE             |
| RAB11A                                        | RAB11A, member RAS oncogene family                                             | RE, vesicle, PM           |
| <i>Ras family</i>                             |                                                                                |                           |
| RHOB                                          | ras homolog family member B                                                    | nucleus, LE, PM           |
| RHOT1                                         | ras homolog family member T1                                                   | mitochondrion<br>OM       |
| <i>Interacting proteins</i>                   |                                                                                |                           |
| G3BP2                                         | GTPase activating protein (SH3 domain) binding protein 2                       | cytoplasm                 |
| RAB3GAP2                                      | RAB3 GTPase activating protein subunit 2 (non-catalytic)                       | cytoplasm                 |
| <b>Vesicle coats and adaptors</b>             |                                                                                |                           |
| <i>BBSome</i>                                 |                                                                                |                           |
| BBS4                                          | Bardet-Biedl syndrome 4                                                        | CS/MTOC                   |
| <i>Clathrin coats</i>                         |                                                                                |                           |
| AGFG1                                         | ArfGAP with FG repeats 1                                                       | nucleus, vesicle          |
| AP2A1                                         | adaptor-related protein complex 2, $\alpha$ 1 subunit                          | CCV, PM                   |
| AP3D1                                         | adaptor-related protein complex 3, $\beta$ 1 subunit                           | CCV, Golgi                |
| CLTA/B                                        | clathrin, light chain A and B                                                  | CCV                       |
| CLTC                                          | clathrin, heavy chain (Hc)                                                     | CCV                       |
| GGA3                                          | golgi-associated, $\gamma$ adaptin ear containing, ARF binding protein 3       | Golgi, endosome           |
| SYNRG                                         | synergin, $\gamma$                                                             | Golgi                     |
| <i>COP-I</i>                                  |                                                                                |                           |
| ARCN1                                         | archain 1                                                                      | Golgi, vesicle            |
| COPA/B1/B2/G1                                 | coatamer protein complex, subunit $\alpha$ , $\beta$ , $\beta'$ , and $\gamma$ | Golgi, vesicle            |
| TMED10                                        | transmembrane emp24-like trafficking protein 10                                | ER, Golgi, vesicle        |
| <i>COP-II</i>                                 |                                                                                |                           |
| SEC24D                                        | SEC24 family member D                                                          | ER, Golgi, vesicle        |
| <i>Retromer</i>                               |                                                                                |                           |
| VPS35                                         | vacuolar protein sorting 35 homolog                                            | EE, LE                    |
| <b>Tethering factors</b>                      |                                                                                |                           |
| <i>Exocyst complex</i>                        |                                                                                |                           |
| EXOC5                                         | exocyst complex component 5                                                    | cytoplasm                 |
| <i>TRAPPIII complex</i>                       |                                                                                |                           |
| TRAPPC8                                       | trafficking protein particle complex 8                                         | Golgi                     |



18.11.2019

Host factors for SIF formation

## SNAREs

### *Q $\alpha$ -SNAREs*

|      |            |        |
|------|------------|--------|
| STX5 | syntaxin 5 | Golgi  |
| STX7 | syntaxin 7 | EE, LE |

### *Q $\beta$ ,c-SNAREs*

|        |                                         |    |
|--------|-----------------------------------------|----|
| SNAP23 | synaptosomal-associated protein, 23 kDa | PM |
|--------|-----------------------------------------|----|

### *R-SNAREs*

|        |                                             |                                            |
|--------|---------------------------------------------|--------------------------------------------|
| SEC22B | SEC22 vesicle trafficking protein homolog B | ER, Golgi                                  |
| VAMP7  | vesicle-associated membrane protein 7       | ER, Golgi, LE/<br>lysosome,<br>vesicle, PM |

### *Interacting proteins*

|        |                                                                        |          |
|--------|------------------------------------------------------------------------|----------|
| NAPA   | <i>N</i> -ethylmaleimide-sensitive factor attachment protein, $\alpha$ | membrane |
| STXBP2 | syntaxin binding protein 2                                             | PM       |

## Cytoskeleton and motor proteins

### *Kinesins*

|           |                                    |    |
|-----------|------------------------------------|----|
| KIF1A/B/C | kinesin family member 1A, B, and C | CS |
|-----------|------------------------------------|----|

### *Dyneins*

|         |                                      |    |
|---------|--------------------------------------|----|
| DYNC1H1 | dynein, cytoplasmic 1, heavy chain 1 | CS |
|---------|--------------------------------------|----|

### *Microtubule-associated proteins*

|       |                                   |                     |
|-------|-----------------------------------|---------------------|
| CEP57 | centrosomal protein 57 kDa        | CS/MTOC,<br>nucleus |
| MAP1A | microtubule-associated protein 1A | CS                  |

### *Myosins*

|       |                                    |    |
|-------|------------------------------------|----|
| MYH10 | myosin, heavy chain 10, non-muscle | CS |
|-------|------------------------------------|----|

### *Actin filament membrane linkers*

|      |                                        |    |
|------|----------------------------------------|----|
| ANK3 | ankyrin 3, node of Ranvier (ankyrin G) | CS |
| FLNA | filamin A, $\alpha$                    | CS |

## ESCRT complexes

### *Adaptors*

|     |                                                              |         |
|-----|--------------------------------------------------------------|---------|
| HGS | hepatocyte growth factor-regulated tyrosine kinase substrate | EE, MVB |
|-----|--------------------------------------------------------------|---------|

### *AAA ATPase*

|         |                                            |     |
|---------|--------------------------------------------|-----|
| VPS4A/B | vacuolar protein sorting 4 homolog A and B | MVB |
|---------|--------------------------------------------|-----|

## Miscellaneous

|        |                                                                |                                          |
|--------|----------------------------------------------------------------|------------------------------------------|
| ERGIC1 | endoplasmic reticulum-golgi intermediate compartment (ERGIC) 1 | ER, Golgi                                |
| SNX15  | sorting nexin 15                                               | vesicle                                  |
| SORT1  | sortilin 1                                                     | nucleus, ER,<br>Golgi, endo-<br>lysosome |
| VCP    | Valosin-containing protein                                     | nucleus, ER                              |

1095 <sup>1</sup> according to NCBI Gene

1096 <sup>2</sup> subcellular localization according to UniProt; CCV = clathrin-coated vesicle, CS =  
1097 cytoskeleton, EE = early endosome, ER = endoplasmic reticulum, LE = late endosome, MTOC  
1098 = microtubule organizing center, MVB = multivesicular body, OM = outer membrane, PM =  
1099 plasma membrane, RE = recycling endosome  
1100

18.11.2019

Host factors for SIF formation

1101 **Table 2.** Host proteins (gene symbols) identified as hits in the trafficome screen that are also  
 1102 present in at least one distinct SMM proteome.

| 8 h p.i. SMM <sup>1</sup>   | 30 min p.i. SCV <sup>2</sup> | 3 h p.i. SCV <sup>2</sup> |
|-----------------------------|------------------------------|---------------------------|
| AP2A1 (AP-2)                | -                            | AP2A1                     |
| -                           | -                            | BET1 (SNARE)              |
| -                           | CLTC (clathrin)              | -                         |
| COPA/G1 (COPI) <sup>3</sup> | -                            | -                         |
| DYNC1H1 (dynein)            | DYNC1H1                      | -                         |
| -                           | ERGIC1                       | ERGIC1                    |
| -                           | ERP29                        | -                         |
| -                           | -                            | EXOC5                     |
| FLNA (filamin)              | FLNA                         | FLNA                      |
| G3BP2                       | -                            | G3BP2                     |
| -                           | IQGAP1                       | IQGAP1                    |
| -                           | KIF5B (kinesin-1)            | KIF5B                     |
| -                           | MAP1B                        | -                         |
| MYH9/10 (myosin II)         | MYH9                         | MYH9                      |
| NAPA/ $\alpha$ -SNAP        | -                            | -                         |
| RAB2A <sup>3</sup>          | RAB2A                        | -                         |
| -                           | RAB4A                        | -                         |
| RAB7A <sup>3</sup>          | RAB7A                        | -                         |
| RAB11A <sup>3</sup>         | -                            | -                         |
| RAB14 <sup>3</sup>          | -                            | -                         |
| -                           | SEC22B (SNARE)               | -                         |
| -                           | SEC24C (COPII)               | -                         |
| TMED10 (COPI)               | -                            | -                         |
| VCP                         | -                            | -                         |

1103 <sup>1</sup> [32]

1104 <sup>2</sup> [33]

1105 <sup>3</sup> colocalization with SMM shown by fluorescence microscopy

18.11.2019

Host factors for SIF formation

1107 **Figure legends**

1108

1109 **Figure 1. RNAi screen setup and validation.** A) Intracellular phenotypes of STM under  
1110 screening conditions. HeLa-LAMP1-GFP cells were infected with mCherry-labelled STM WT  
1111 or *ssaV* strains and imaged live 8 h p.i. by SDCM. Presence of STM in LAMP1-positive SCV  
1112 (blue arrowhead), induction of SIF formation by STM WT (white arrowhead), and lack for SIF  
1113 formation by STM *ssaV* strain. Scale bar, 10  $\mu$ m. B) Controls for siRNA-mediated knockdown.  
1114 HeLa-LAMP1-GFP cells were reverse transfected with scrambled AllStars siRNA or PLK1  
1115 siRNA. Scale bar, 20  $\mu$ m. C) Validation of SKIP siRNA knockdown. HeLa-LAMP1-GFP cells  
1116 were reverse transfected with AllStars or SKIP siRNA. Then, RT-PCR targeting *SKIP* was  
1117 performed. Depicted is the mean with standard deviation of three biological replicates ( $n = 3$ )  
1118 each performed in triplicates. Statistical analysis was performed using Student's *t*-test and  
1119 indicated as: \*\*\*,  $p < 0.001$ . D) SKIP knockdown as control for inhibition of SIF formation.  
1120 HeLa-LAMP1-GFP cells were first reverse transfected with AllStars or SKIP siRNA. Then,  
1121 cells were infected with mCherry-labelled STM WT (MOI = 15) and imaged live 1-7 h p.i. by  
1122 SDCM. Blue arrowheads indicate SIF-forming or non-SIF-forming single bacteria or  
1123 microcolonies, white arrowheads indicate SIF. Scale bar, 10  $\mu$ m.

1124

1125 **Figure 2. Basic workflow of the trafficome RNAi screen.** 96-well plates with clear bottoms  
1126 were automatically spotted with siRNAs. HeLa-LAMP1-GFP cells were seeded for reverse  
1127 transfection. After 72 h of incubation, infection with STM was performed, followed by LCI  
1128 using an SDCM system with hourly intervals of imaging. Phenotypic scoring was performed  
1129 using the SifScreen utility. The MATLAB-based data input mask allows the entry of well- and  
1130 position-specific information on general cell behavior and *Salmonella*/SMM phenotypes and  
1131 the generation of a results report.



18.11.2019

Host factors for SIF formation

1132

1133 **Figure 3. Interaction network of selected trafficome hits.** The interaction of high-ranking  
1134 hits (scoring cutoff of  $\geq 8$ , see also Table 1) was visualized using the STRING database  
1135 (confidence view). Borders delineate clusters related to the cytoskeleton (i, iii), SNAREs (ii),  
1136 or COPI and clathrin-coated vesicles (iv).

1137

1138 **Figure 4. Influence of host factor silencing on SIF formation.** HeLa-LAMP1-GFP cells were  
1139 not transfected (mock), or reverse transfected with siAllStars or the indicated siRNA, infected  
1140 with STM WT or SPI2-deficient *ssaV* expressing mCherry as indicated, and SIF counted.  
1141 Depicted are means with standard deviation for three biological replicates ( $n = 3$ ). Statistical  
1142 analysis was performed against siAllstars + WT with Student's *t*-test and indicated as: n.s., not  
1143 significant; \*,  $p < 0.05$ ; \*\*,  $p < 0.01$ ; \*\*\*,  $p < 0.001$ .

1144

1145 **Figure 5. RAB proteins identified by the trafficome screen colocalize with SIF and SCV.**  
1146 A) Direct interaction network of RAB1B as visualized by STRING. B) and C) HeLa cells either  
1147 stably transfected with LAMP1-GFP (green), or transiently transfected with LAMP1-mCherry  
1148 (red) were co-transfected with plasmids encoding various RAB GTPases (RAB7A, RAB1A,  
1149 RAB1B, RAB3A, RAB8A, RAB8B, RAB9A, RAB11A) fused to GFP (green) or mRuby2 (red)  
1150 and then infected with STM WT expressing mCherry or GFP. Living cells were imaged from  
1151 6-9 h p.i. by CLSM and images are shown as maximum intensity projections (MIP). Insets  
1152 magnify structures of interest and white arrowheads indicate colocalization with SIF. Scale  
1153 bars, 10  $\mu\text{m}$  (overviews), 1  $\mu\text{m}$  (details).

1154

18.11.2019

Host factors for SIF formation

1155 **Figure 6. SNARE proteins identified by the trafficome screen colocalize with SIF and**  
1156 **SCV.** A) Direct interaction network of STX7 as visualized by STRING. B) and C) HeLa cells  
1157 either stably transfected with LAMP1-GFP (green), or transiently transfected with LAMP1-  
1158 mCherry (red) were co-transfected with plasmids encoding various SNAREs (STX7, VTIB,  
1159 STX8, VAMP7, VAMP8, VAMP2, VAMP3, VAMP4) fused to GFP (green) or mRuby2 (red).  
1160 Infection and imaging was performed as for Figure 5. Insets magnify structures of interest and  
1161 white and blue arrowheads indicate colocalization with SIF and SCV, respectively. Scale bars,  
1162 10  $\mu\text{m}$  (overviews), 1  $\mu\text{m}$  (details).

1163

1164 **Figure 7. CLTA identified by the trafficome screen colocalizes with SIF and SCV.** A)  
1165 Direct interaction network of CLTA as visualized by STRING. B) HeLa cells stably transfected  
1166 with LAMP1-GFP (green) were co-transfected with a plasmid encoding CLTA fused to  
1167 mRuby2 (red). Infection and imaging was performed as for Figure 5. Insets magnify structures  
1168 of interest and white and blue arrowheads indicate colocalization with SIF and SCV,  
1169 respectively. Scale bars, 10  $\mu\text{m}$  (overviews), 1  $\mu\text{m}$  (details).

1170

1171 **Figure 8. Newly identified interactions of intracellular STM with host factors.** Depicted  
1172 are central eukaryotic endomembrane organelles possibly playing a role in the newly identified  
1173 interplays of host factors with SIF. Magnifications show the interactions of clathrin (i), late  
1174 secretory and/or recycling-related RAB3A, RAB8A/B, and VAMP2/3/4 (ii), late endo-  
1175 /lysosomal VTI1B, STX8, and VAMP8 (iii), and early secretory RAB1A/B (iv) with other host  
1176 factors added as discussed in the text. Solid lines represent interactions identified here or  
1177 otherwise known, dashed lines represent putative interactions. COP, coat protein complex; EE,  
1178 early endosome; ER, endoplasmic reticulum; LE, late endosome; Lys, lysosome; RE, recycling

18.11.2019

Host factors for SIF formation

1179 endosome; SCV, *Salmonella*-containing vacuole; SIF, *Salmonella*-induced filaments; STM, *S.*

1180 Typhimurium; SV, secretory vesicle.

1181

1182 **Suppl. Material**

1183 **Suppl. Tables**

1184 **Table S1.** Full list of the 496 host factors targeted in the siRNA screen including gene symbols,  
1185 NCBI Gene IDs and accession numbers, full name, and aliases.

1186

1187 **Table S2.** Summary of the scoring of the executed siRNA screen with a full list of the  
1188 trafficome, a list with hits only, and lists with low-, mid-, and high-ranking hits (scoring of 1-  
1189 4, 5-7, or  $\geq 8$ , respectively).

1190

1191 **Table S3.** Requirements of an RNAi screen with LCI for the identification of host factors  
1192 involved in SIF formation by intracellular *Salmonella*.

| Type of prerequisite | Prerequisite                                                                                                                                                                                                                                                                  | Necessity/Solution                                                                                                                                                                                                                                                                                                                                                   |
|----------------------|-------------------------------------------------------------------------------------------------------------------------------------------------------------------------------------------------------------------------------------------------------------------------------|----------------------------------------------------------------------------------------------------------------------------------------------------------------------------------------------------------------------------------------------------------------------------------------------------------------------------------------------------------------------|
| biological           | <ul style="list-style-type: none"> <li>• label for structure of interest</li> <li>• <i>Salmonella</i> controls for structure of interest</li> </ul>                                                                                                                           | <ul style="list-style-type: none"> <li>• LAMP1 as marker of SIF</li> <li>• WT: SIF-positive, <i>ssaV</i>: SIF-negative</li> </ul>                                                                                                                                                                                                                                    |
| technical            | <ul style="list-style-type: none"> <li>• fast and gentle microscopic system</li> <li>• multiwell-compatible 37 °C incubation</li> <li>• multiwell-compatible sufficient magnification</li> <li>• autofocus system</li> <li>• autofocus-compatible multiwell plates</li> </ul> | <ul style="list-style-type: none"> <li>• spinning disk confocal microscope (Zeiss)</li> <li>• box incubation (custom-made)</li> <li>• LD 40x/0.6 objective (+ bottom thickness correction collar, Zeiss)</li> <li>• infrared-based system (Definite Focus, Zeiss)</li> <li>• 96 Well Clear Bottom Black Cell Culture Microplates (0.5 mm bottom, Corning)</li> </ul> |
| siRNA-related        | <ul style="list-style-type: none"> <li>• harmlessness of transfection reagent</li> <li>• harmlessness of siRNA as reagent</li> <li>• general efficacy of siRNA</li> <li>• phenotype-interfering siRNA</li> </ul>                                                              | <ul style="list-style-type: none"> <li>• mock transfection control</li> <li>• scrambled AllStars siRNA control</li> <li>• lethal PLK1 siRNA control</li> <li>• SIF-abolishing SKIP siRNA</li> <li>• RT-PCR of SKIP knockdown</li> </ul>                                                                                                                              |

18.11.2019

Host factors for SIF formation

|               |                                                                                                         |                                                                                                       |
|---------------|---------------------------------------------------------------------------------------------------------|-------------------------------------------------------------------------------------------------------|
|               | <ul style="list-style-type: none"> <li>control of phenotype-interfering siRNA</li> </ul>                |                                                                                                       |
| data analysis | <ul style="list-style-type: none"> <li>primary analysis</li> <li>collection of analyzed data</li> </ul> | <ul style="list-style-type: none"> <li>manual visual inspection</li> <li>SifScreen utility</li> </ul> |

1193

1194 **Table S4.** Characteristics of microscopy systems with respect to LCI and RNAi screening.

| System | Advantage                                                                                                | Disadvantage                                                                                          |
|--------|----------------------------------------------------------------------------------------------------------|-------------------------------------------------------------------------------------------------------|
| WFM    | <ul style="list-style-type: none"> <li>fast</li> <li>gentle to cells</li> </ul>                          | <ul style="list-style-type: none"> <li>lowest resolution (without deconvolution)</li> </ul>           |
| CLSM   | <ul style="list-style-type: none"> <li>highest resolution</li> </ul>                                     | <ul style="list-style-type: none"> <li>slow</li> <li>high local illumination, photo-damage</li> </ul> |
| SDCM   | <ul style="list-style-type: none"> <li>high resolution</li> <li>fast</li> <li>gentle to cells</li> </ul> | <ul style="list-style-type: none"> <li>lower resolution as CLSM (due to camera)</li> </ul>            |

1195

1196 **Table S5.** Suitability of various types of multi-well plates for screening with LD 40x objective  
1197 and IRF.

| Type                    | Bottom thickness in mm | Applicability                                                                   | Representative suppliers              |
|-------------------------|------------------------|---------------------------------------------------------------------------------|---------------------------------------|
| standard plastic        | 1                      | <ul style="list-style-type: none"> <li>no, bottom variation too high</li> </ul> | Corning, Greiner, Thermo/Nunc, TPP    |
| glass                   | 0.17                   | <ul style="list-style-type: none"> <li>no, otherwise incompatible</li> </ul>    | Corning, Greiner, MatTek, Thermo/Nunc |
| cyclic olefin/synthetic | 0.19                   | <ul style="list-style-type: none"> <li>no, otherwise incompatible</li> </ul>    | Corning, Greiner                      |
| special plastic         | 0.5                    | <ul style="list-style-type: none"> <li>yes</li> </ul>                           | Corning                               |

1198

1199 **Table S6.** Bacterial strains and plasmids used in this study.

| Designation        | Relevant genotype                                | Source/Reference |
|--------------------|--------------------------------------------------|------------------|
| <b>STM strains</b> |                                                  |                  |
| NCTC 12023         | wild type                                        | lab collection   |
| P2D6               | <i>ssaV::mTn5</i>                                | [4]              |
| MvP1897            | $\Delta$ <i>phoN::P<sub>EM7</sub>::sfGFP aph</i> | this study       |
| <b>Plasmids</b>    |                                                  |                  |
| p3099              | P <sub>CMV</sub> ::eGFP::RAB8A                   | This study       |
| p3101              | P <sub>CMV</sub> ::eGFP::RAB9A                   | This study       |
| p3451              | P <sub>CMV</sub> ::hLAMP1::mCherry               | [18]             |
| p4080              | P <sub>CMV</sub> ::mRuby2-C1                     | This study       |
| p4081              | P <sub>CMV</sub> ::mRuby2-N1                     | This study       |

18.11.2019

Host factors for SIF formation

|                  |                                  |                                               |
|------------------|----------------------------------|-----------------------------------------------|
| p4094            | P <sub>CMV</sub> ::mRuby2::STX8  | This study                                    |
| p4122            | P <sub>CMV</sub> ::mRuby2::RAB1B | This study                                    |
| p4209            | P <sub>CMV</sub> ::mRuby2::RAB8B | This study                                    |
| p4210            | P <sub>CMV</sub> ::mRuby2::RAB3A | This study                                    |
| p4232            | P <sub>CMV</sub> ::mRuby2::CLTA  | This study                                    |
| p4250            | P <sub>CMV</sub> ::mRuby2::RAB1A | This study                                    |
| pcDNA3-mRuby2    | P <sub>CMV</sub> ::mRuby2        | Addgene (#40260), [146]                       |
| pEGFP VAMP3      | P <sub>CMV</sub> ::eGFP::VAMP3   | Thierry Galli, Paris, Addgene (#42310), [147] |
| pEGFP VAMP7      | P <sub>CMV</sub> ::eGFP::VAMP7   | Thierry Galli, Paris, Addgene (#42316), [148] |
| pEGFP VAMP8      | P <sub>CMV</sub> ::eGFP::VAMP8   | Thierry Galli, Paris, Addgene (#42311), [147] |
| pEGFP-C1         | P <sub>CMV</sub> ::EGFP-C1       | Clontech                                      |
| pEGFP-C3         | P <sub>CMV</sub> ::EGFP-C3       | Clontech                                      |
| pEGFP-N1         | P <sub>CMV</sub> ::EGFP-N1       | Clontech                                      |
| pEGFP-Vamp4      | P <sub>CMV</sub> ::VAMP4::eGFP   | Wanjin Hong, Singapur                         |
| pENTR223_RAB1A   | RAB1A                            | DNASU GTPases (HsCD00509534)                  |
| pENTR223_RAB1B   | RAB1B                            | DNASU GTPases (HsCD00509534)                  |
| pENTR223_RAB3A   | RAB3A                            | DNASU GTPases (HsCD00507538)                  |
| pENTR223_RAB8B   | RAB8B                            | DNASU GTPases (HsCD00288320)                  |
| pENTR223_STX8    | STX8                             | DNASU 16967 (HsCD00507664)                    |
| pFPV-mCherry     | P <sub>rpsM</sub> ::mCherry      | Addgene (#20956), [34]                        |
| pGL-Rab7 wt      | P <sub>SV40</sub> ::RAB7::eGFP   | Martin Aepfelbacher, Hamburg                  |
| pLenti Vamp2     | VAMP2::pHtomato                  | Yulong Li, Beijing                            |
| pHtomato         |                                  |                                               |
| pMRXIP GFP-Stx7  | P <sub>CMV</sub> ::GFP::STX7     | Addgene (#45921), [149]                       |
| pMRXIP GFP-Vti1b | P <sub>CMV</sub> ::GFP::VTI1B    | Addgene (#45922), [149]                       |

1200

1201 **Table S7.** Individual siRNA information used for validation.

| Gene symbol      | siRNA name  | Catalog no. | Target sequence       |
|------------------|-------------|-------------|-----------------------|
| ---              | AllStars    | SI03650318  | proprietary           |
| HGS              | Hs_HGS_6    | SI02659650  | GCACGTCTTTCCAGAATTCAA |
| PLK1             | Hs_PLK1_7   | SI02223844  | CGCGGGCAAGATTGTGCCTAA |
| RAB1A            | Hs_RAB1A_9  | SI02662716  | AACTATAGAGTTAGACGGGAA |
| RAB7A            | Hs_RAB7A_2  | SI00066395  | TCCCGTTAGATCAGCATTCTA |
| RAB11A           | Hs_RAB11A_7 | SI02663206  | AAGAGCGATATCGAGCTATAA |
| SKIP/<br>PLEKHM2 | custom      | custom      | AAAACGAAGAGCAGCTGTTCA |
| STX5             | Hs_STX5A_4  | SI00048636  | CAGTGGAAATTGAAGAGCTAA |
| STX7             | Hs_STX7_7   | SI03064159  | CAGAGGATGACCTCCGTCTTA |
| VAMP7            | Hs_SYBL1_7  | SI04212453  | TAGGGCAATCGTGTGCTAAT  |
| VAMP8            | Hs_VAMP8_2  | SI02652993  | CCGACTAGGCGAATTCCTTA  |



18.11.2019

Host factors for SIF formation

|       |            |            |                       |
|-------|------------|------------|-----------------------|
| VCP   | Hs_VCP_7   | SI03019730 | AACAGCCATTCTCAAACAGAA |
| VPS11 | Hs_VPS11_6 | SI02778167 | CAGCAATATATCCGAACCATT |

1202

1203 **Table S8.** Oligonucleotides in this study.

| Targeted gene                        | Designation        | Sequence 5'-3'                                      |
|--------------------------------------|--------------------|-----------------------------------------------------|
| <b>Used for RT-PCR</b>               |                    |                                                     |
| GAPDH                                | Hs-GAPDH-qPCR-For2 | TGCACCACCAACTGCTTAGC                                |
|                                      | Hs-GAPDH-qPCR-Rev2 | GGCATGGACTGTGGTCATGAG                               |
| HGS                                  | Hs-HGS-qPCR-For    | CTCCTGTTGGAGACAGATTGGG                              |
|                                      | Hs-HGS-qPCR-Rev    | GTGTGGGTTCTTGTTCGTTGAC                              |
| RAB1A                                | Hs-RAB1A-qPCR-For  | AGATTA AAAAGCGAATGGGTCCC                            |
|                                      | Hs-RAB1A-qPCR-Rev  | GCTTGACTGGAGTGCTCTGAAT                              |
| RAB7A                                | Hs-RAB7A-qPCR-For  | TACAAAGCCACAATAGGAGCTG                              |
|                                      | Hs-RAB7A-qPCR-Rev  | GCAGTCTGCACCTCTGTAGAAG                              |
| RAB11A                               | Hs-RAB11A-qPCR-For | CAACAAGAAGCATCCAGGTTGA                              |
|                                      | Hs-RAB11A-qPCR-Rev | GCACCTACAGCTCCACGATAAT                              |
| SKIP/<br>PLEKHM2                     | Hs-SKIP-qPCR-For   | TAGAGTTCATTTCGTTTCGAGCTG                            |
|                                      | Hs-SKIP-qPCR-Rev   | AAGGCGGTCTTCAAAGTCCAG                               |
| STX5                                 | Hs-STX5-qPCR-For   | AAAGCGCAAGTCCCTCTTTGA                               |
|                                      | Hs-STX5-qPCR-Rev   | TGAGCAATTTGTTTGTGAGGC                               |
| STX7                                 | Hs-STX7-qPCR-For   | GGCCCAGAGGATCTCTTCTAA                               |
|                                      | Hs-STX7-qPCR-Rev   | ACTGTTGCCTCAATTCAGGTG                               |
| VAMP7                                | Hs-VAMP7-qPCR-For  | GAGGTTCCAGACTACTTACGGT                              |
|                                      | Hs-VAMP7-qPCR-Rev  | GACACTTGAGAACTCGCTATTCA                             |
| VAMP8                                | Hs-VAMP8-qPCR-For  | TGTGCGGAACCTGCAAAGT                                 |
|                                      | Hs-VAMP8-qPCR-Rev  | CTTCTGCGATGTCGTCTTGAA                               |
| VCP                                  | Hs-VCP-qPCR-For    | CAAACAGAAGAACCGTCCCAA                               |
|                                      | Hs-VCP-qPCR-Rev    | TCACCTCGGAACAACCTGCAAT                              |
| VPS11                                | Hs-VPS11-qPCR-For  | CAAGCCTACAACTACGGGTG                                |
|                                      | Hs-VPS11-qPCR-Rev  | GAGTGCAGAGTGGATTGCCA                                |
| <b>Used for plasmid construction</b> |                    |                                                     |
| EGFP                                 | Vf-pEGFP-C1        | TCCGGACTCAGATCTCGAGCTCA                             |
|                                      | Vr-pEGFP-C1        | GGTGGCGACCGGTAGCGC                                  |
| EGFP                                 | Vf-pEGFP-N1        | AGTAAAGCGGCCGCGACT                                  |
|                                      | Vr-pEGFP-N1        | GGTGGCGACCGGTGGATC                                  |
| RAB1A                                | 1f-Rab1A           | CTTCGAATTCTGCAGTCGACATGTCCAG<br>CATGAATCCCGAATA     |
|                                      | 1r-Rab1A           | TCTAGATCCGGTGGATCCTCAGCAGCAA<br>CCTCCACCTGAC        |
| RAB1B                                | 1f-Rab1B           | CTTCGAATTCTGCAGTCGACATGAACCC<br>CGAATATGACTACCTGTTT |
|                                      | 1r-Rab1B           | TCTAGATCCGGTGGATCCTCAGCAACAG<br>CCACCGCCAGC         |
| RAB3A                                | 1f-Rab3A           | CTTCGAATTCTGCAGTCGACATGGCATC<br>CGCCACAGACTC        |
|                                      | 1r-Rab3A           | TCTAGATCCGGTGGATCCTCAGCAGGCG<br>CAGTCCTGGTG         |

18.11.2019

Host factors for SIF formation

|        |                  |                                                |
|--------|------------------|------------------------------------------------|
| RAB8B  | 1f-Rab8B         | CTTCGAATTCTGCAGTCGACATGGCGAA<br>GACGTACGAT     |
|        | 1r-Rab8B         | TCTAGATCCGGTGGATCCTCAGCAAAGT<br>AGCGAGCAACG    |
| mRuby2 | 1f-pcDNA3-mRu-C1 | GCGCTACCGGTCGCCACCATGGTGTCTA<br>AGGGCGAAGAG    |
|        | 1r-pcDNA3-mRu-C1 | TCGAGATCTGAGTCCGGACTTGTACAGC<br>TCGTCCATC      |
| mRuby2 | 1f-pcDNA3-mRu-N1 | GATCCACCGGTCGCCACCATGGTGTCTA<br>AGGGCGAAGAG    |
|        | 1r-pcDNA3-mRu-N1 | AGTCGCGGCCGCTTTACTTTACTTGTAC<br>AGCTCGTCCATC   |
| mRuby2 | Vf-pmRuby2-C1    | GGATCCACCGGATCTAGATAAC                         |
|        | Vr-pmRuby2-C1    | GTCGACTGCAGAATTCGAAG                           |
| mRuby2 | Vf-pmRuby2-N1    | CCGCGGGCCCGGGATCCA                             |
|        | Vr-pmRuby2-N1    | CTGCAGAATTCGAAGCTTGAGCTCGAGA                   |
| STX8   | 1f-STX8-C1       | CTTCGAATTCTGCAGTCGACATGGCACC<br>GGACCCCTGGT    |
|        | 1r-STX8-C1       | GTTATCTAGATCCGGTGGATCCGTTGGT<br>CGGCCAGACTGCAA |

1204

18.11.2019

Host factors for SIF formation

1205 **Suppl. Figure legends**

1206

1207 **Figure S1. Validation of host factor siRNA silencing.** HeLa-LAMP1-GFP cells were reverse  
1208 transfected with siAllStars or the indicated siRNA. Total RNA was extracted, mRNA reverse  
1209 transcribed, and the generated cDNA was used in RT-PCR. Depicted are means with standard  
1210 deviation for three biological replicates ( $n = 3$ ) each performed in triplicates. Statistical analysis  
1211 was performed against siAllstars with Student's  $t$ -test and indicated as: \*\*\*,  $p < 0.001$ .

1212

1213 **Suppl. Movie captions**

1214 **Movie 1. Time-lapse acquisition of infected siAllStars-treated cells.** The movie corresponds  
1215 to Figure 1D.

1216

1217 **Movie 2. Time-lapse acquisition of infected siSKIP-treated cells.** The movie corresponds to  
1218 Figure 1D.



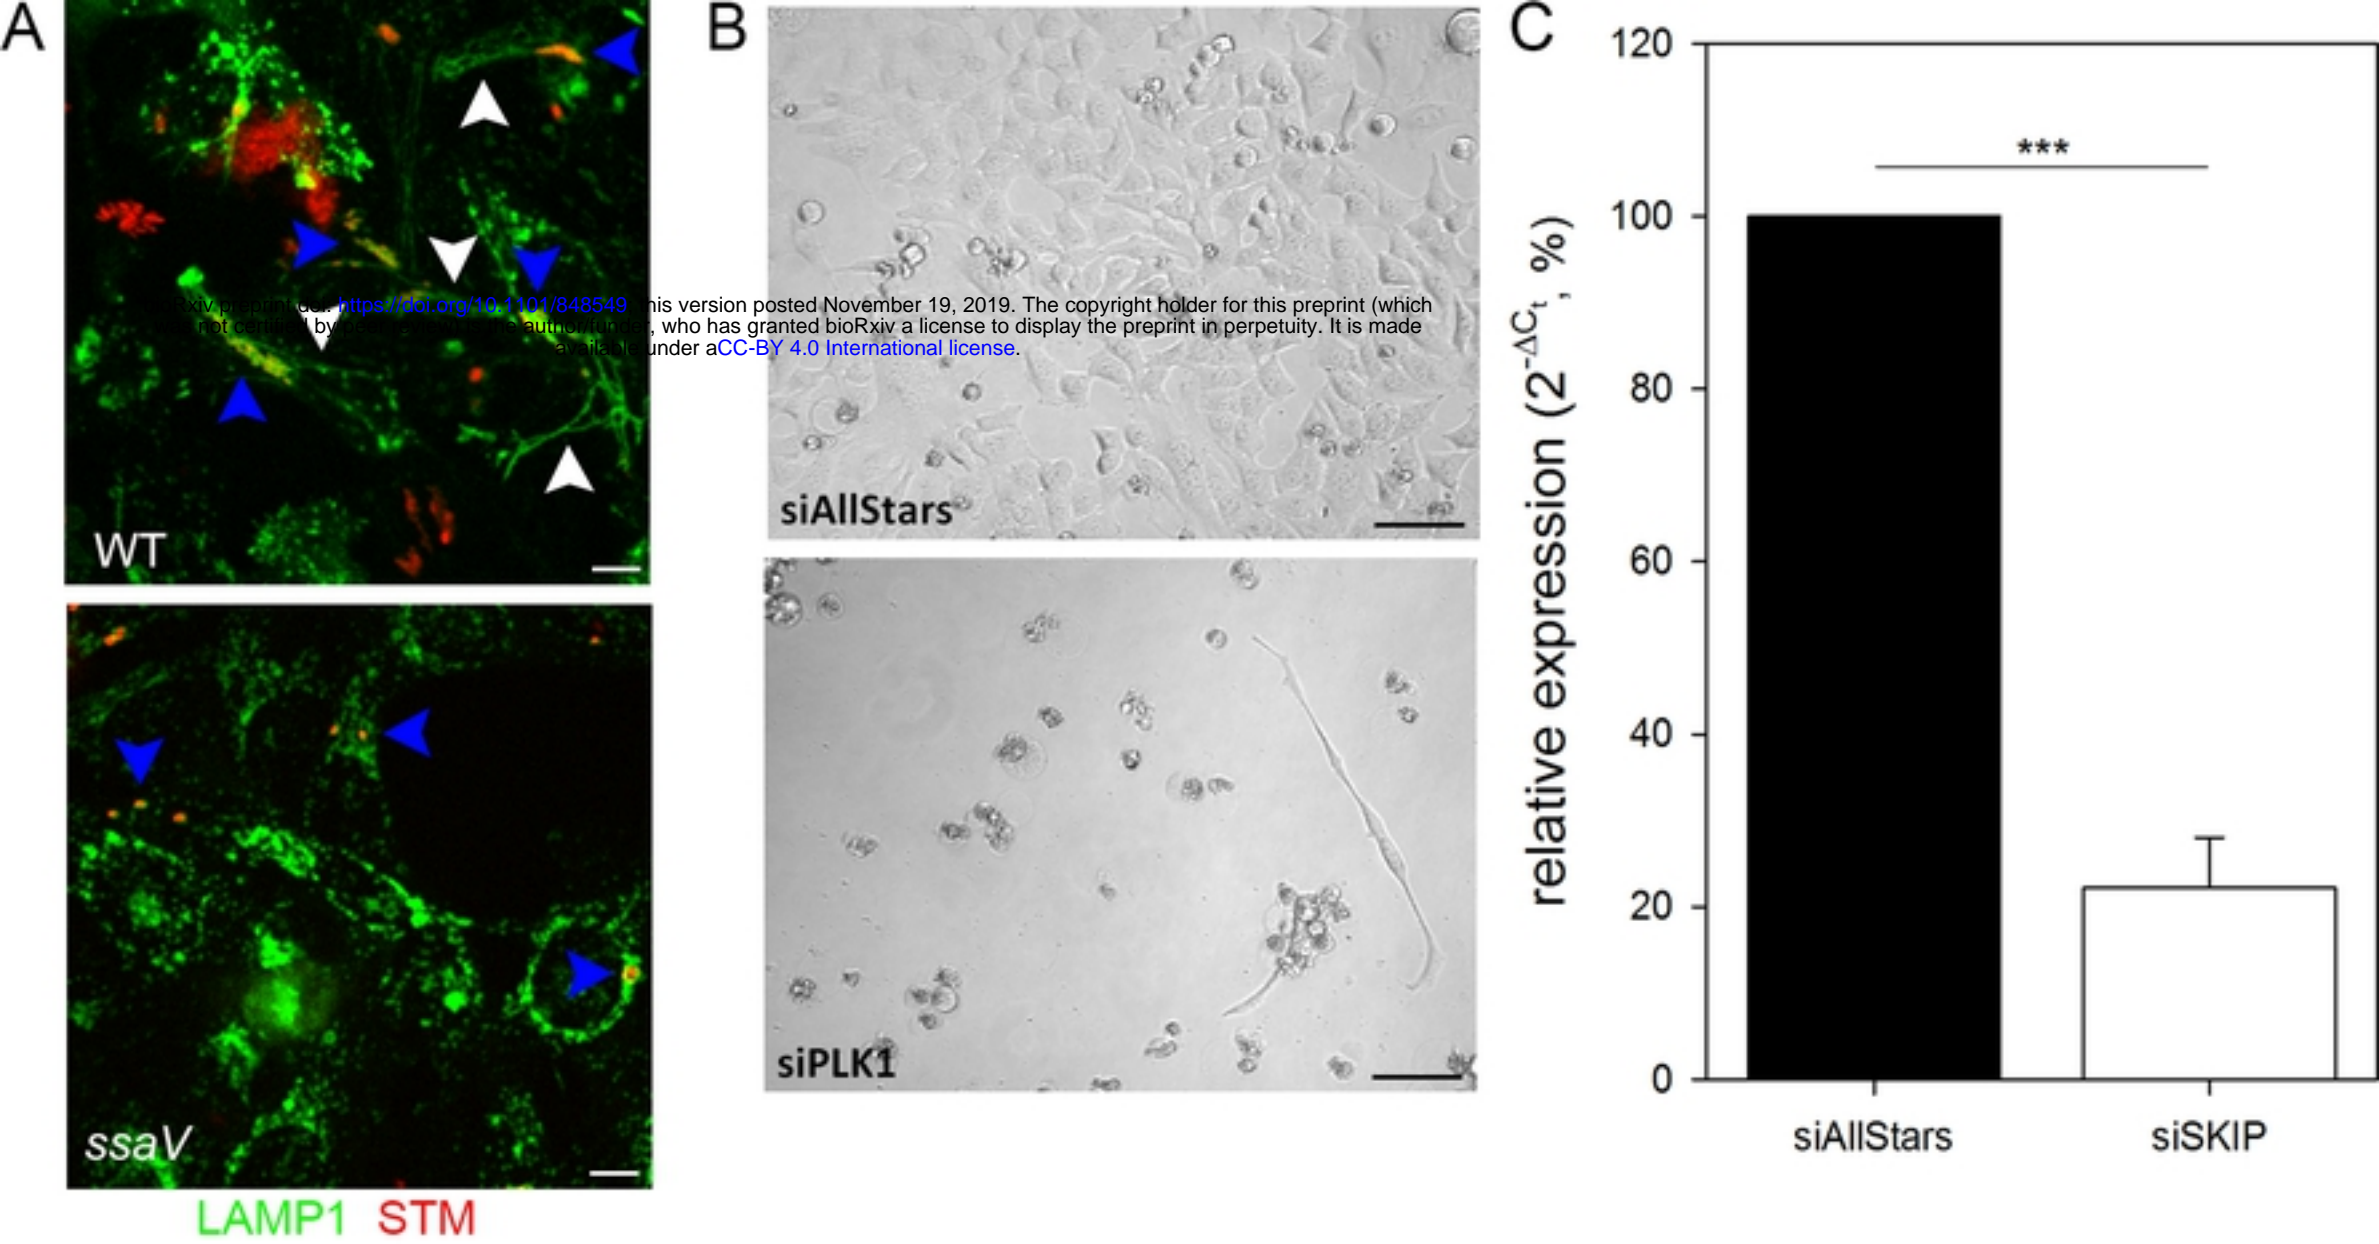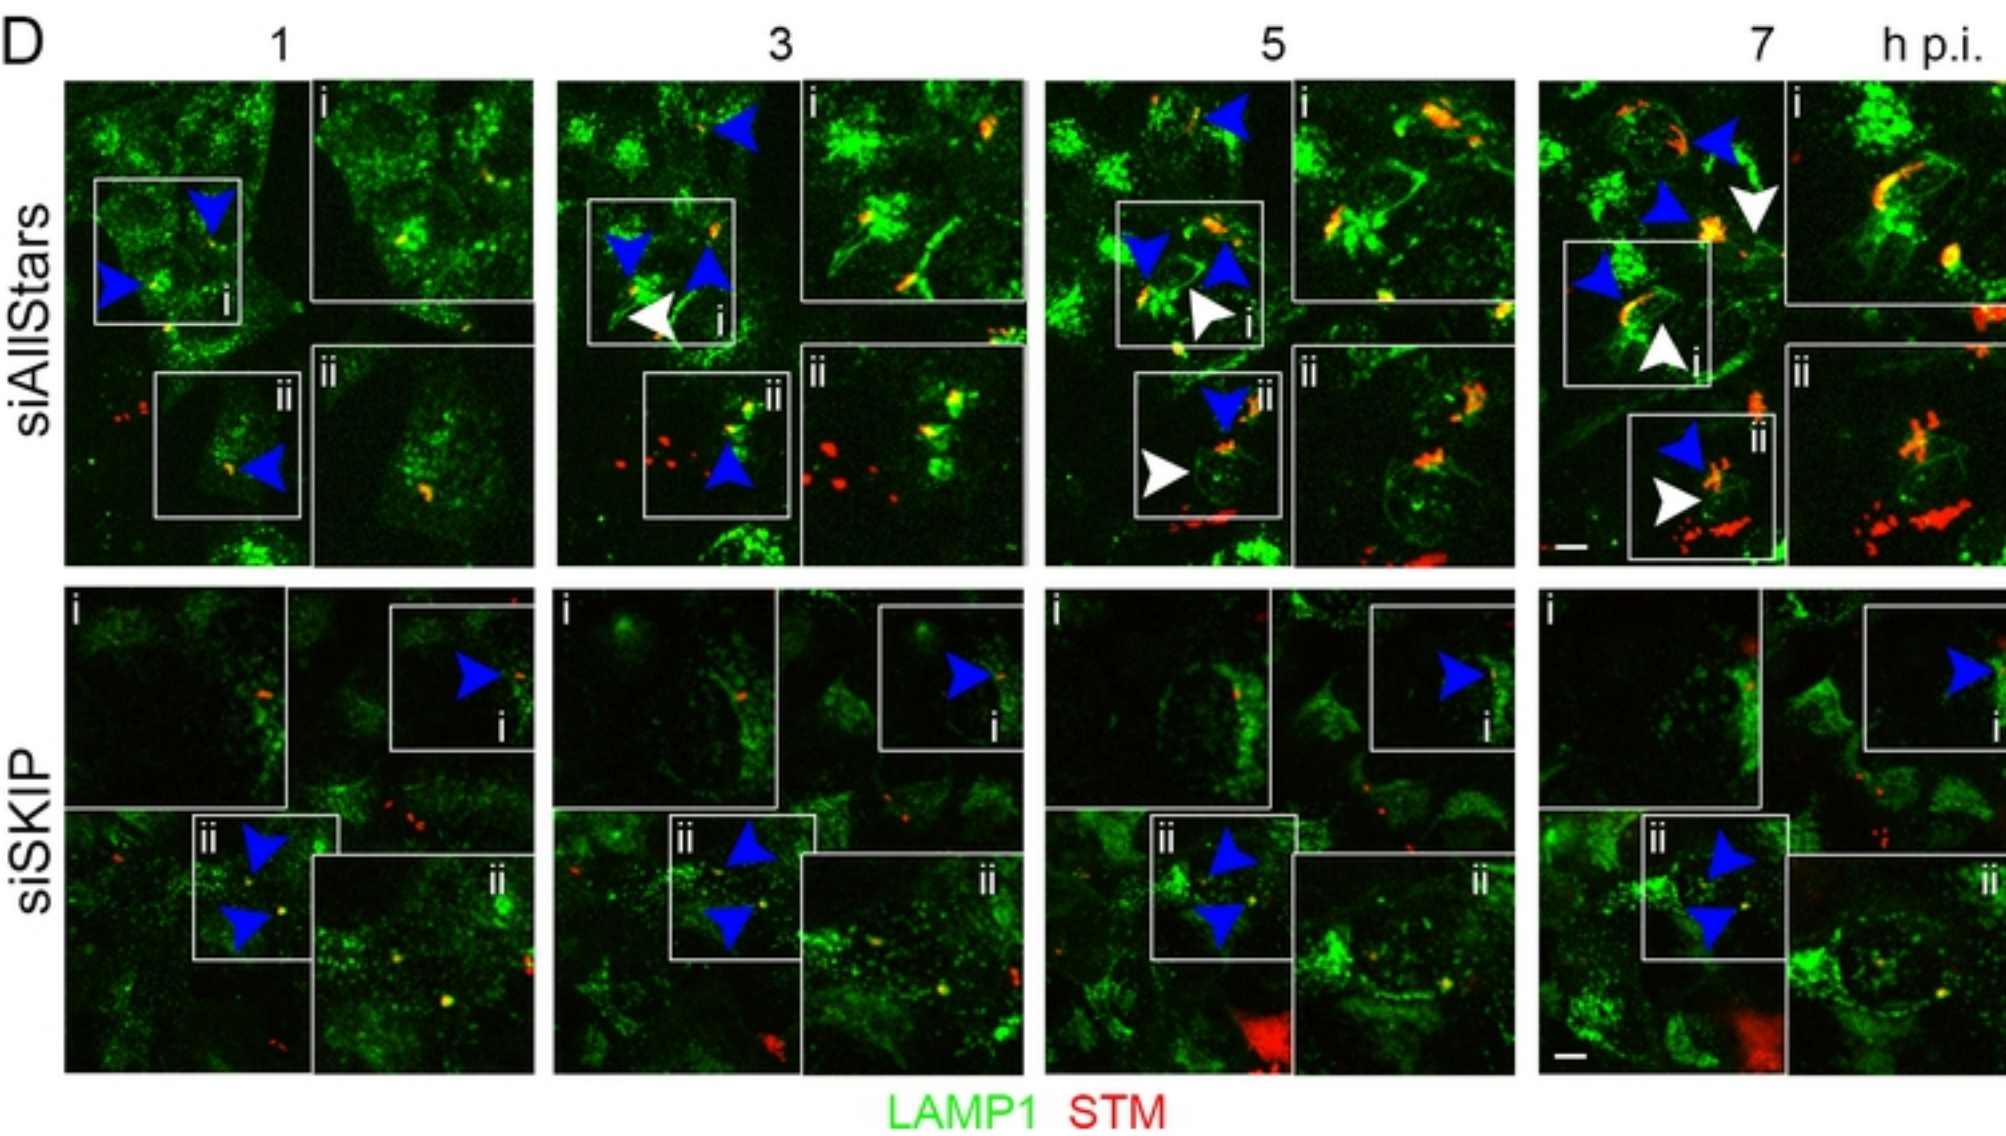

Figure 1



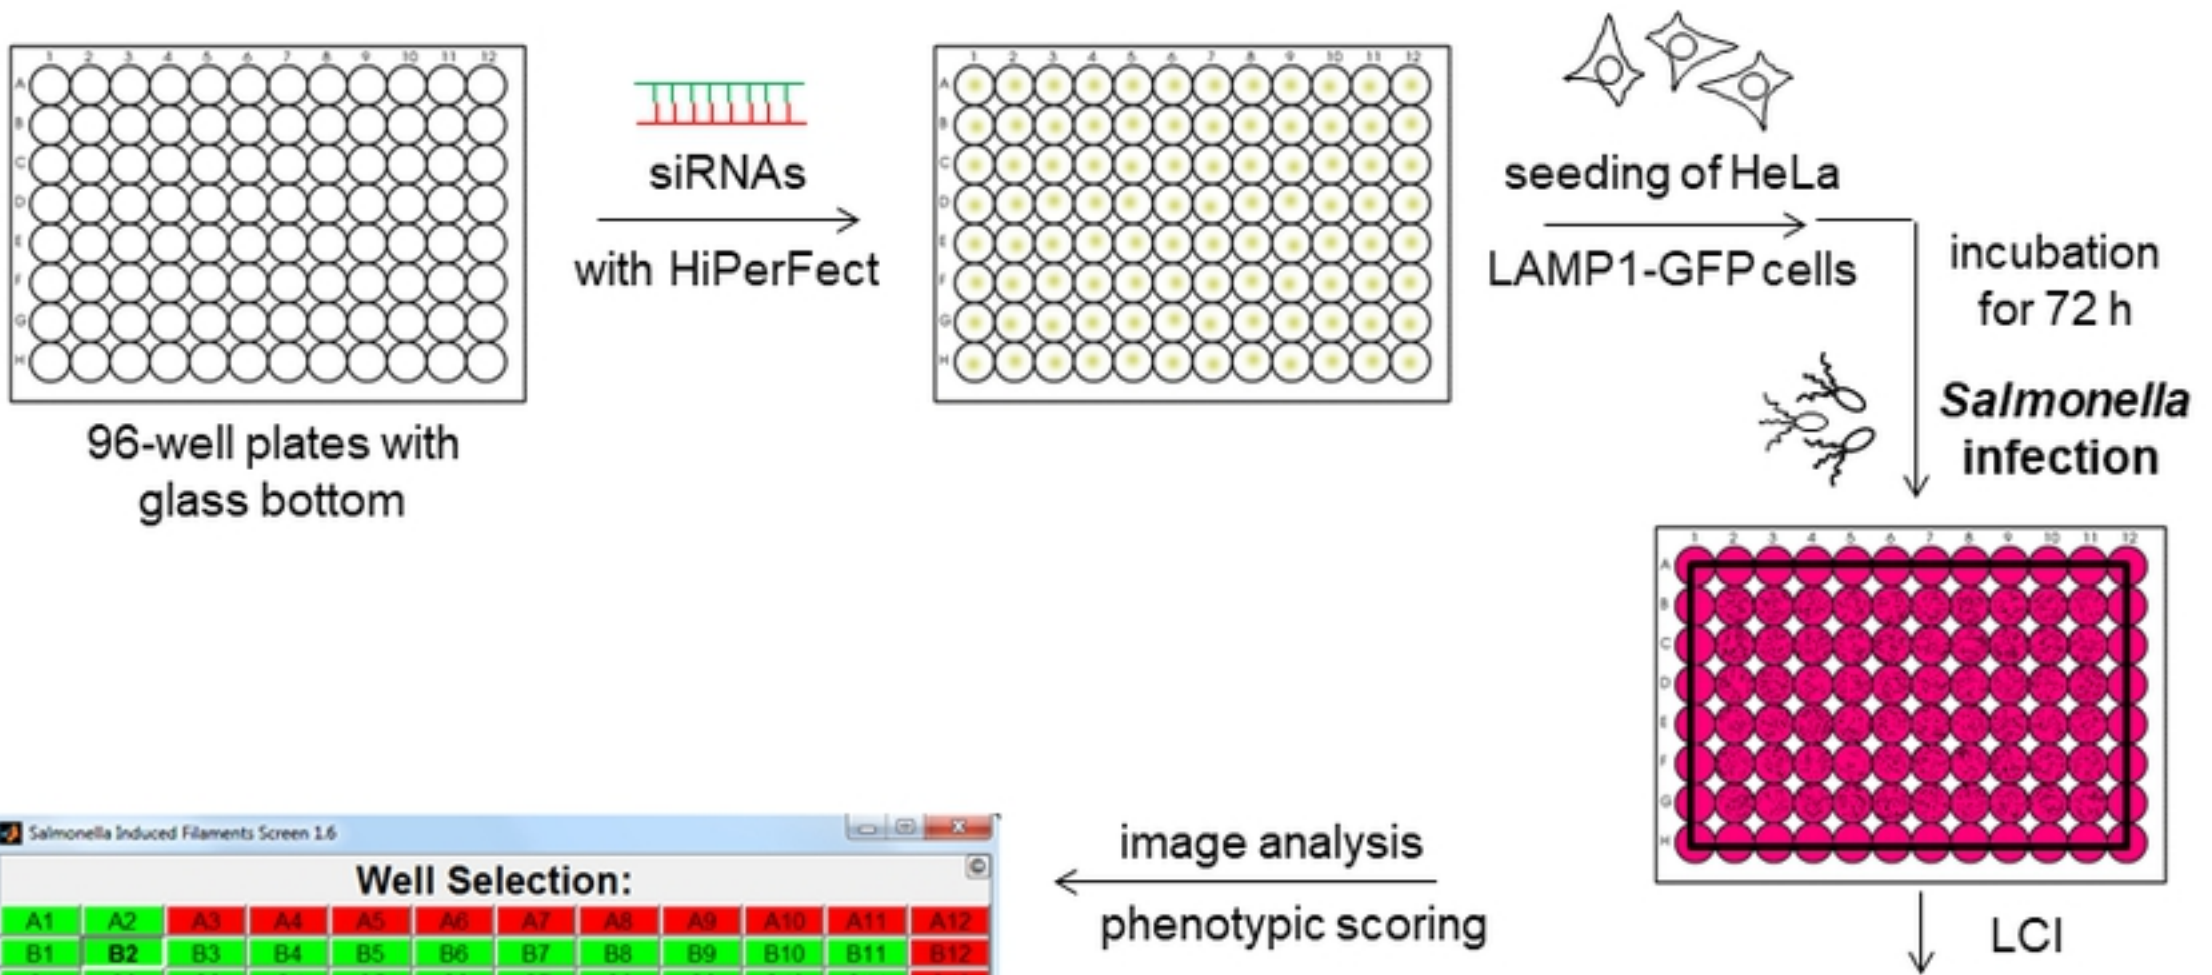

Salmonella Induced Filaments Screen 1.6

**Well Selection:**

|                  |    |    |    |    |    |    |    |    |     |     |     |
|------------------|----|----|----|----|----|----|----|----|-----|-----|-----|
| A1               | A2 | A3 | A4 | A5 | A6 | A7 | A8 | A9 | A10 | A11 | A12 |
| B1               | B2 | B3 | B4 | B5 | B6 | B7 | B8 | B9 | B10 | B11 | B12 |
| C1               | C2 | C3 | C4 | C5 | C6 | C7 | C8 | C9 | C10 | C11 | C12 |
| D1               | D2 | D3 | D4 | D5 | D6 | D7 | D8 | D9 | D10 | D11 | D12 |
| E1               | E2 | E3 | E4 | E5 | E6 | E7 | E8 | E9 | E10 | E11 | E12 |
| F1               | F2 | F3 | F4 | F5 | F6 | F7 | F8 | F9 | F10 | F11 | F12 |
| G1               | G2 | G3 | G4 | G5 | G6 | G7 | G8 | G9 | G10 | G11 | G12 |
| H1               | H2 | H3 | H4 | H5 | H6 | H7 | H8 | H9 | H10 | H11 | H12 |
| <b>Position:</b> |    | 1  | 2  | 3  | 4  | 5  | 6  | 7  | 8   |     |     |

Cells visible?    Salmonella Infection?    SIF?

One/few Cells?    Cells sick/dying?

Altered Replication?    Out of Focus?

Amorphous SCV?    Loss of SCV?

Single SIF/Cell?    Amorphous SIF?

Altered SIF dynamics?    Altered SIF Network?

**Notes:**

Save Results

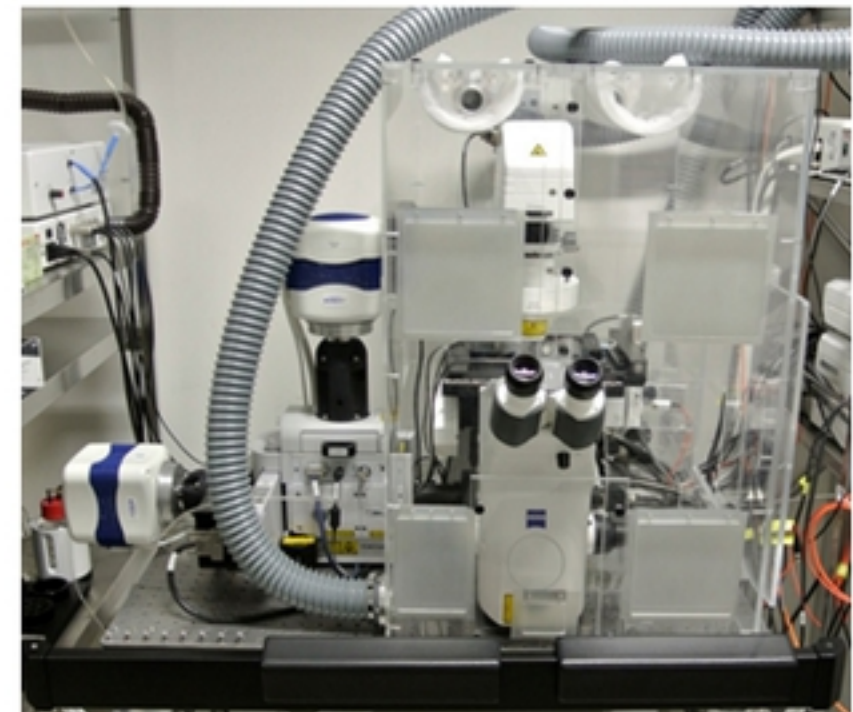

Figure 2

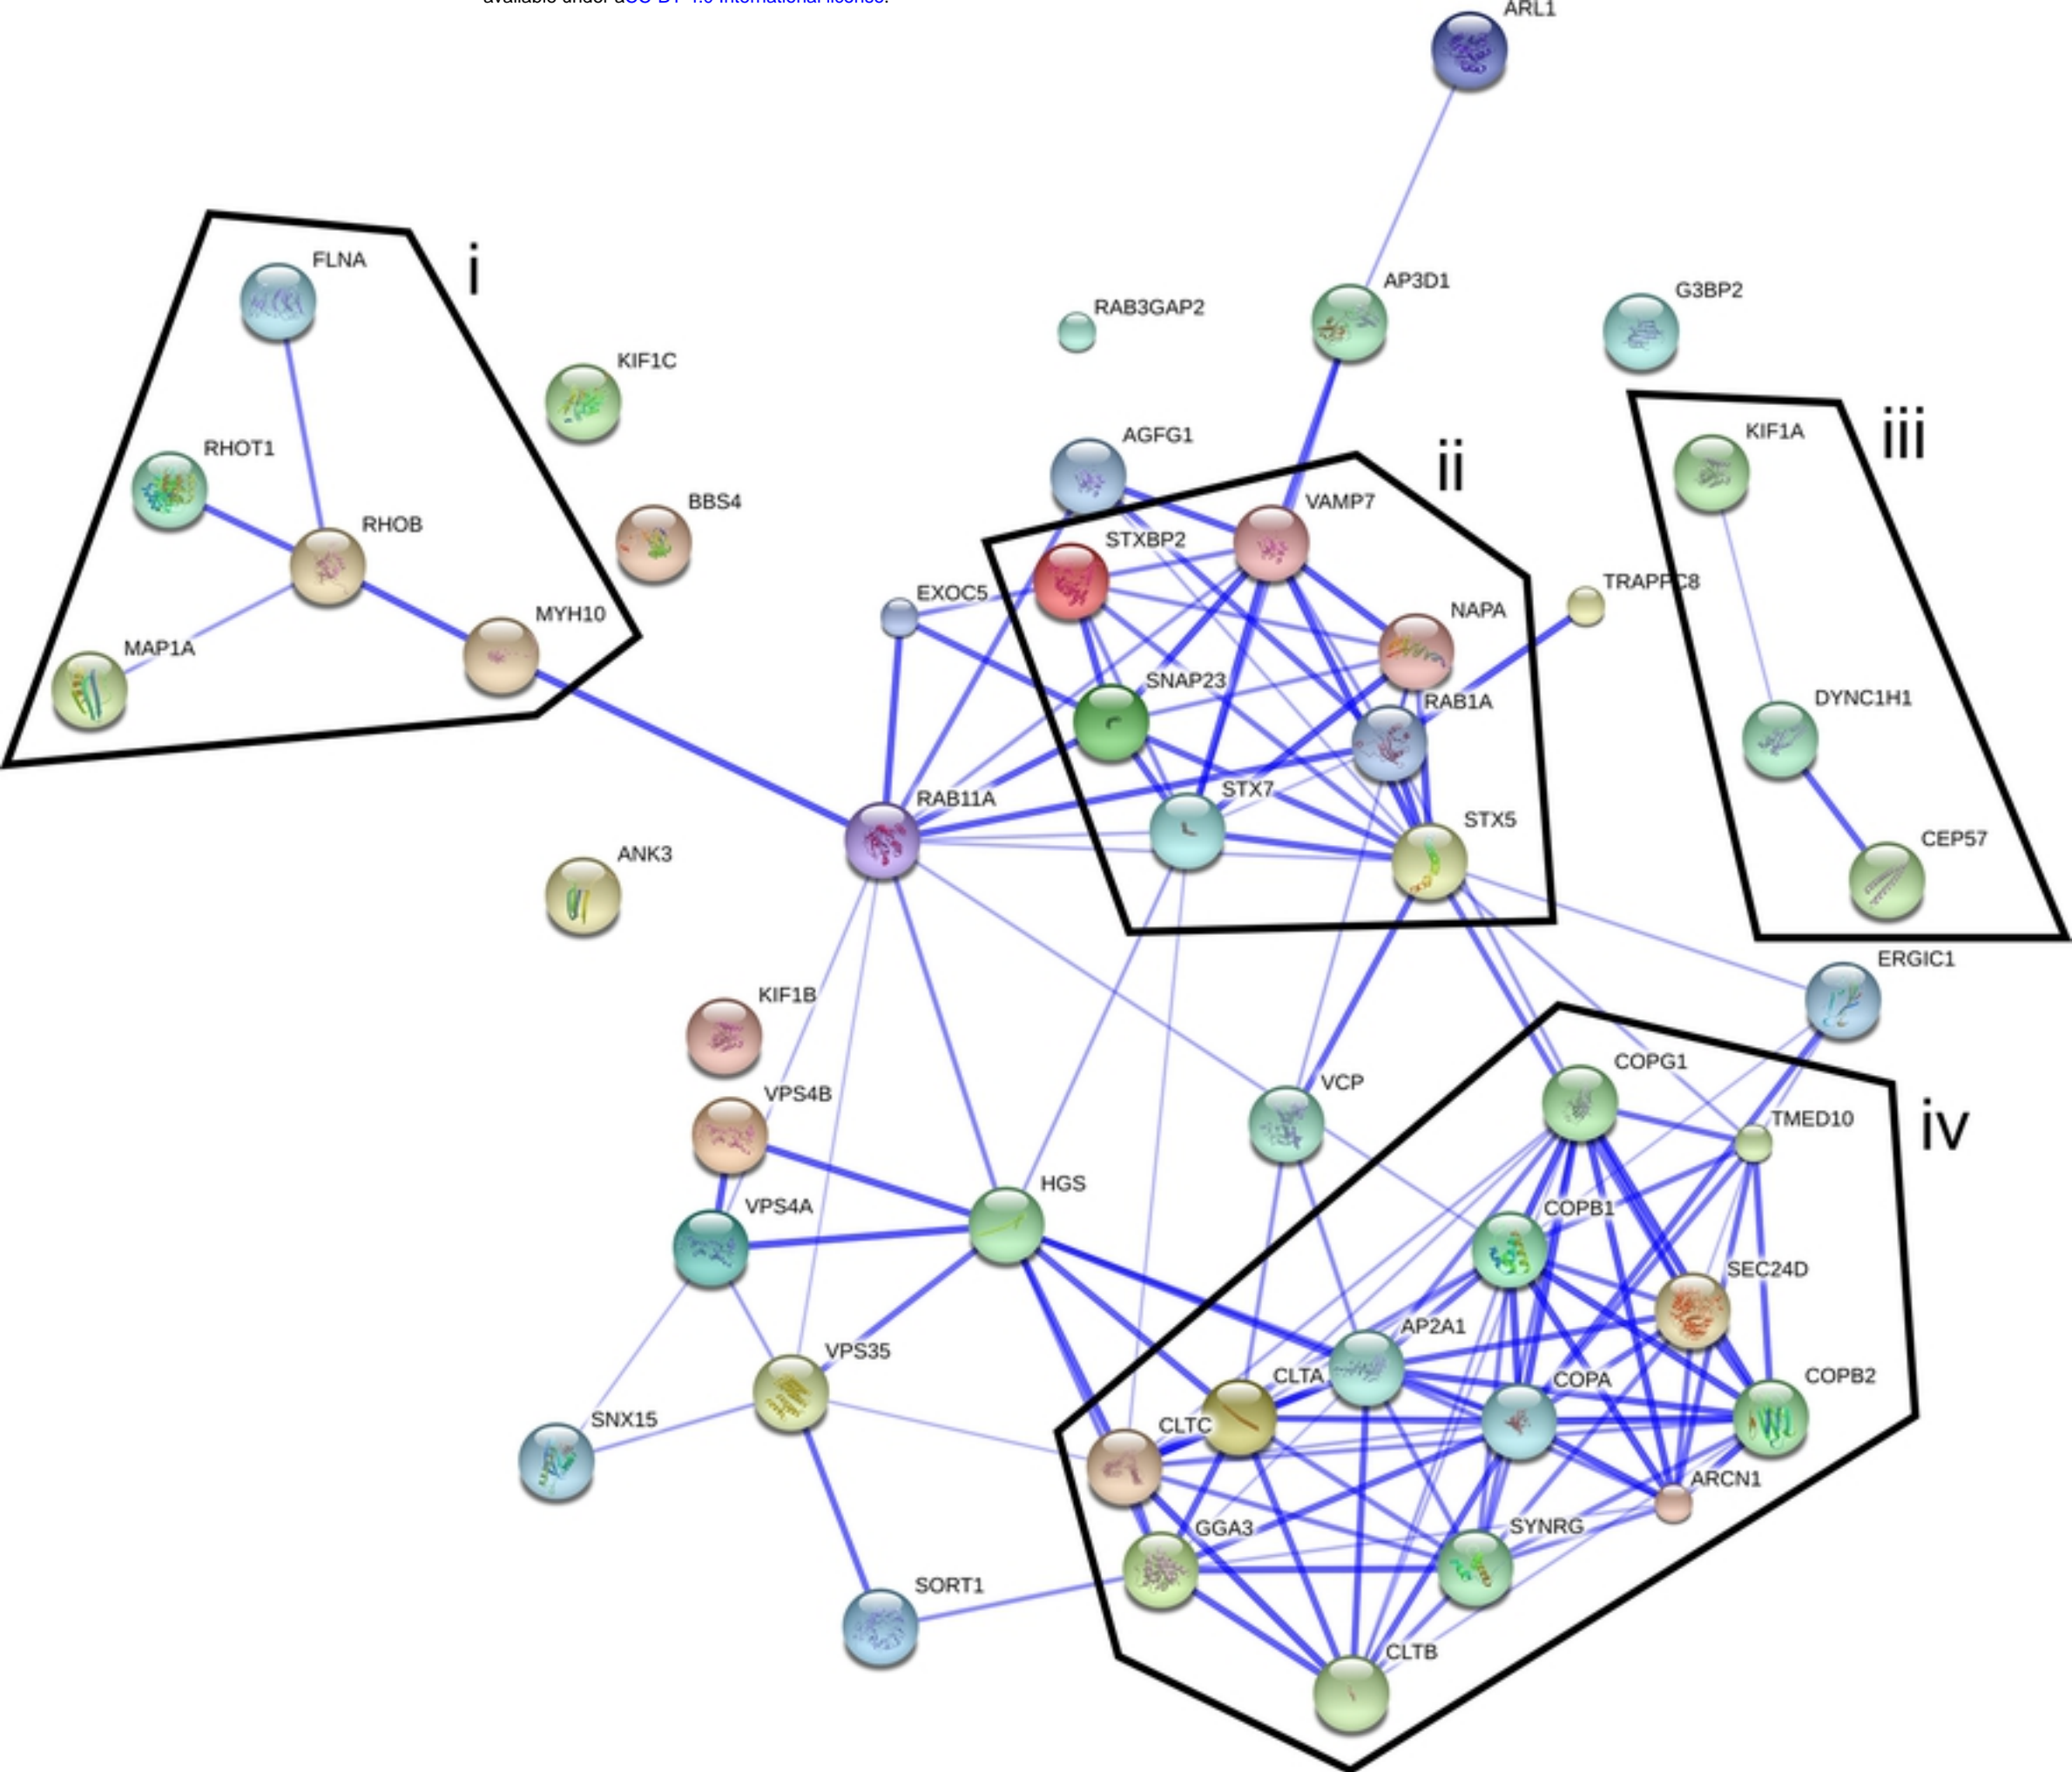

Figure 3



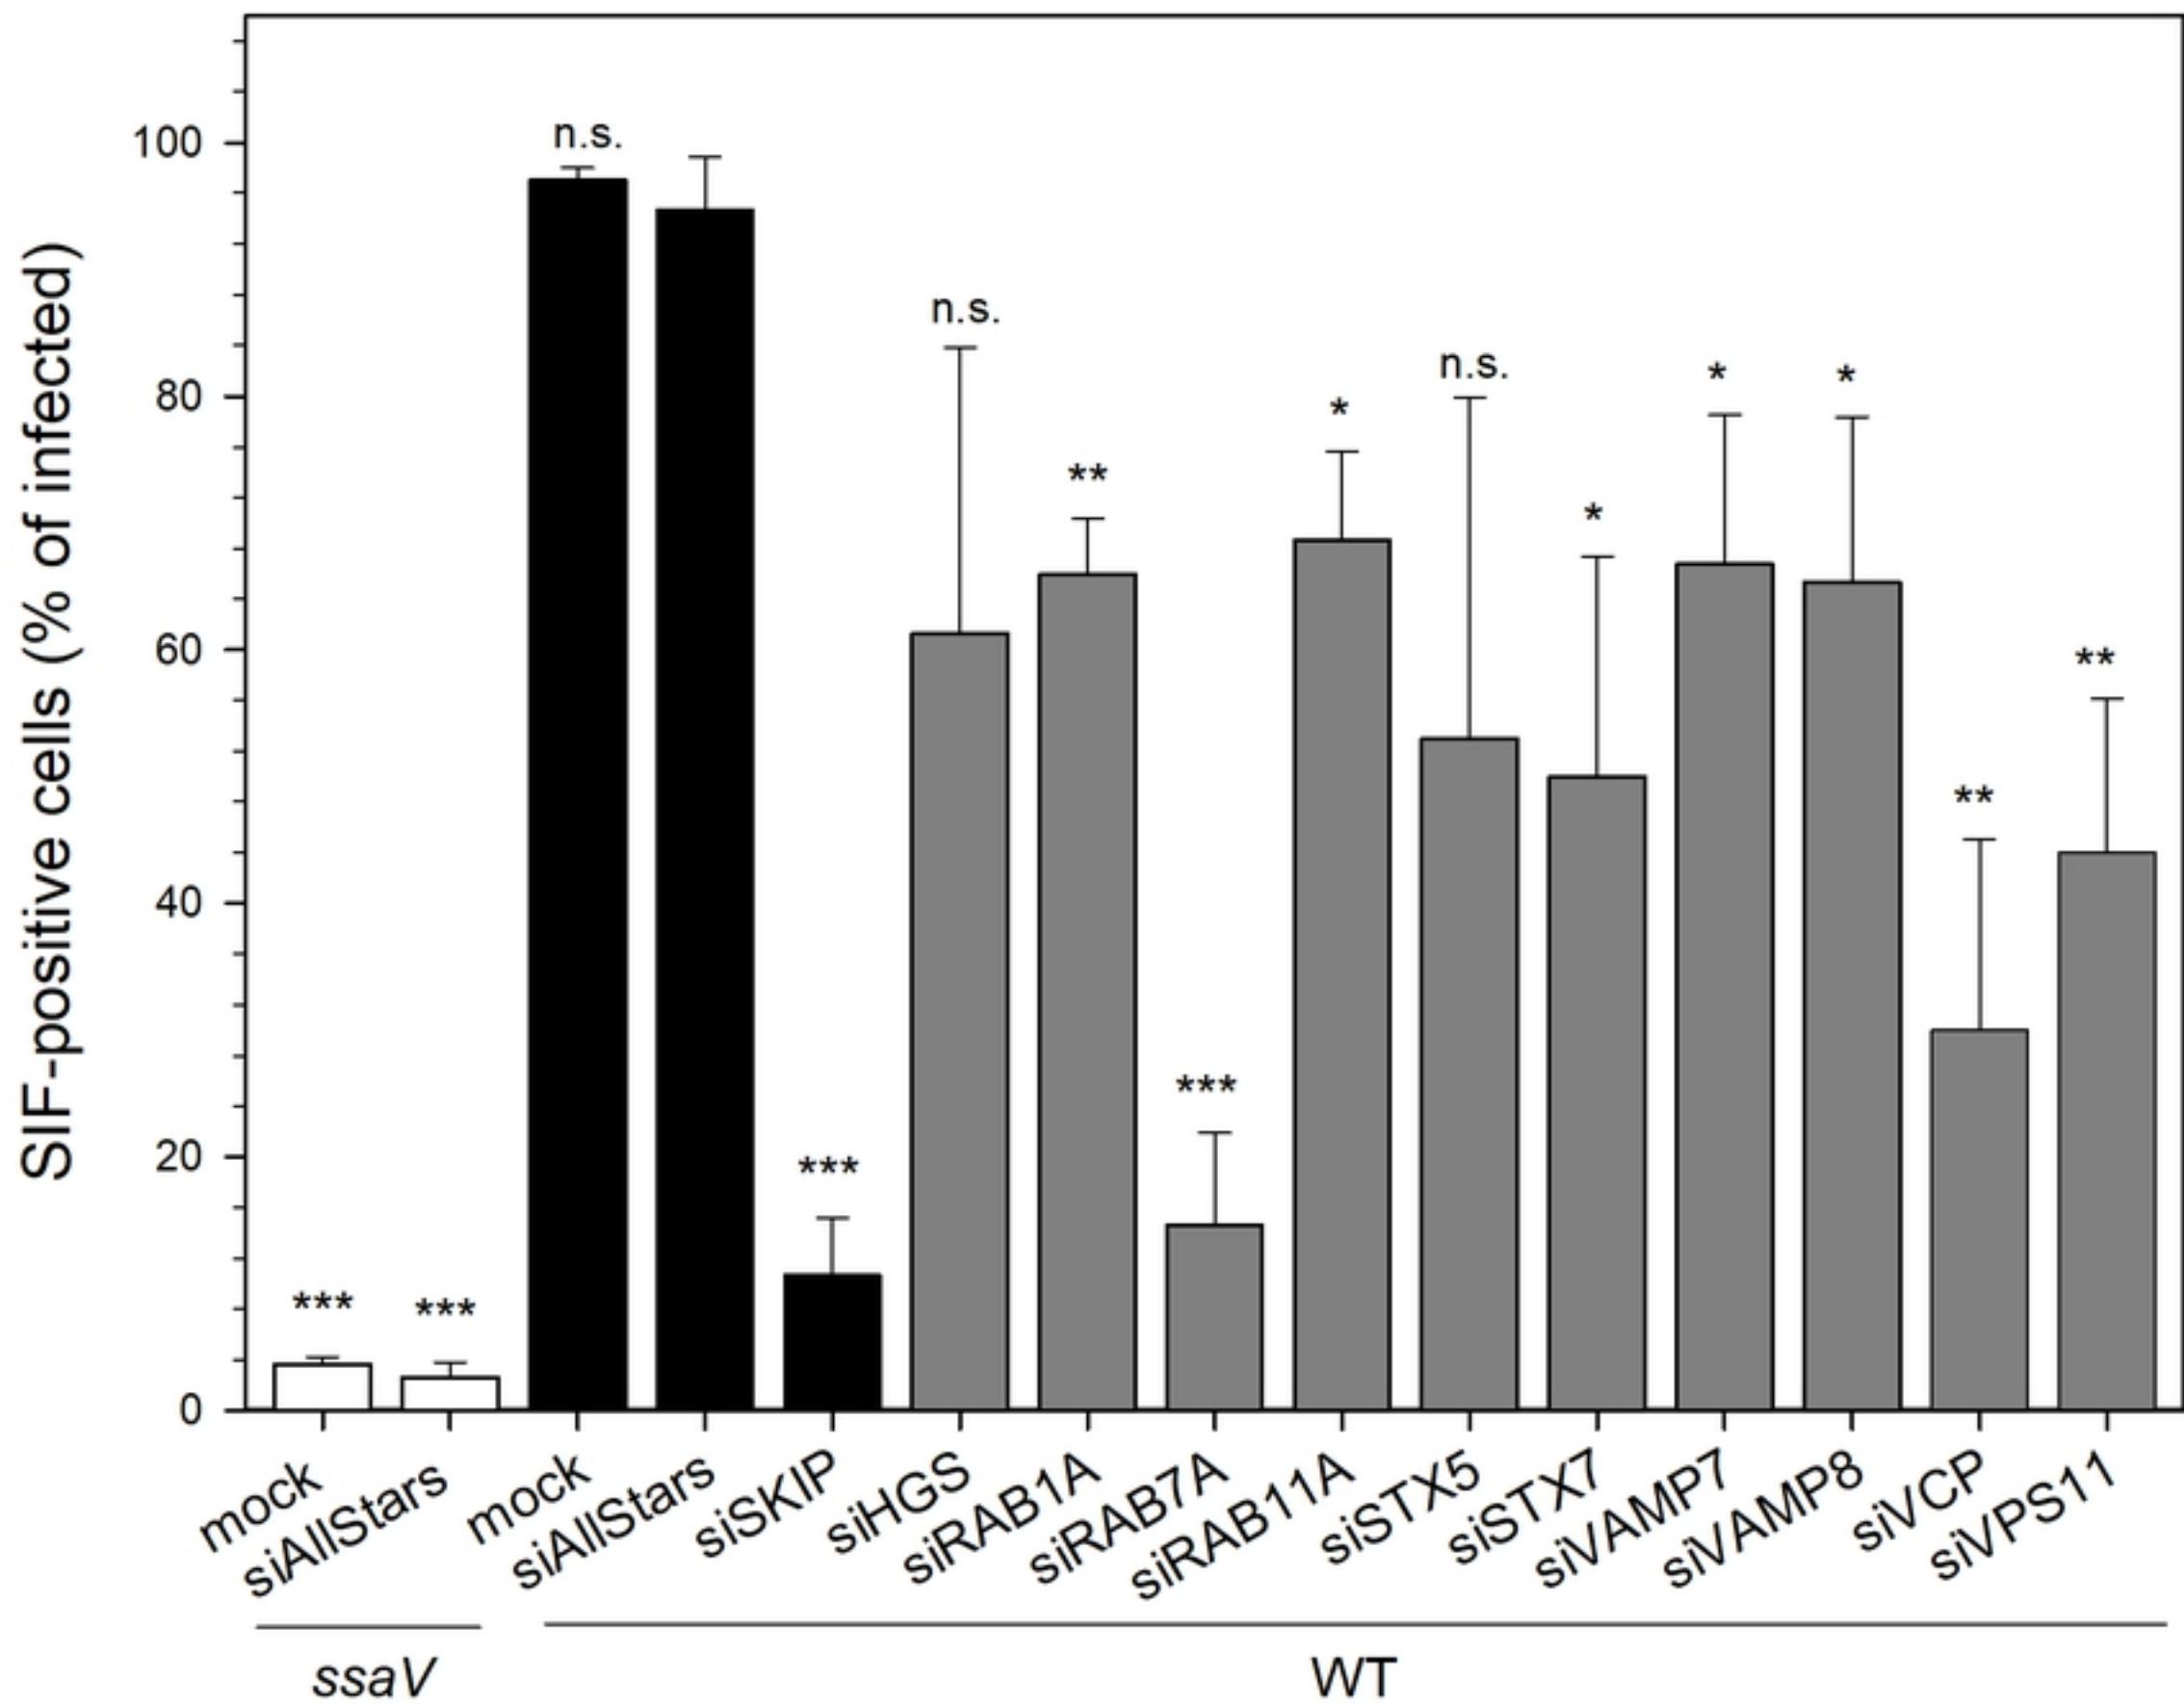

Figure 4



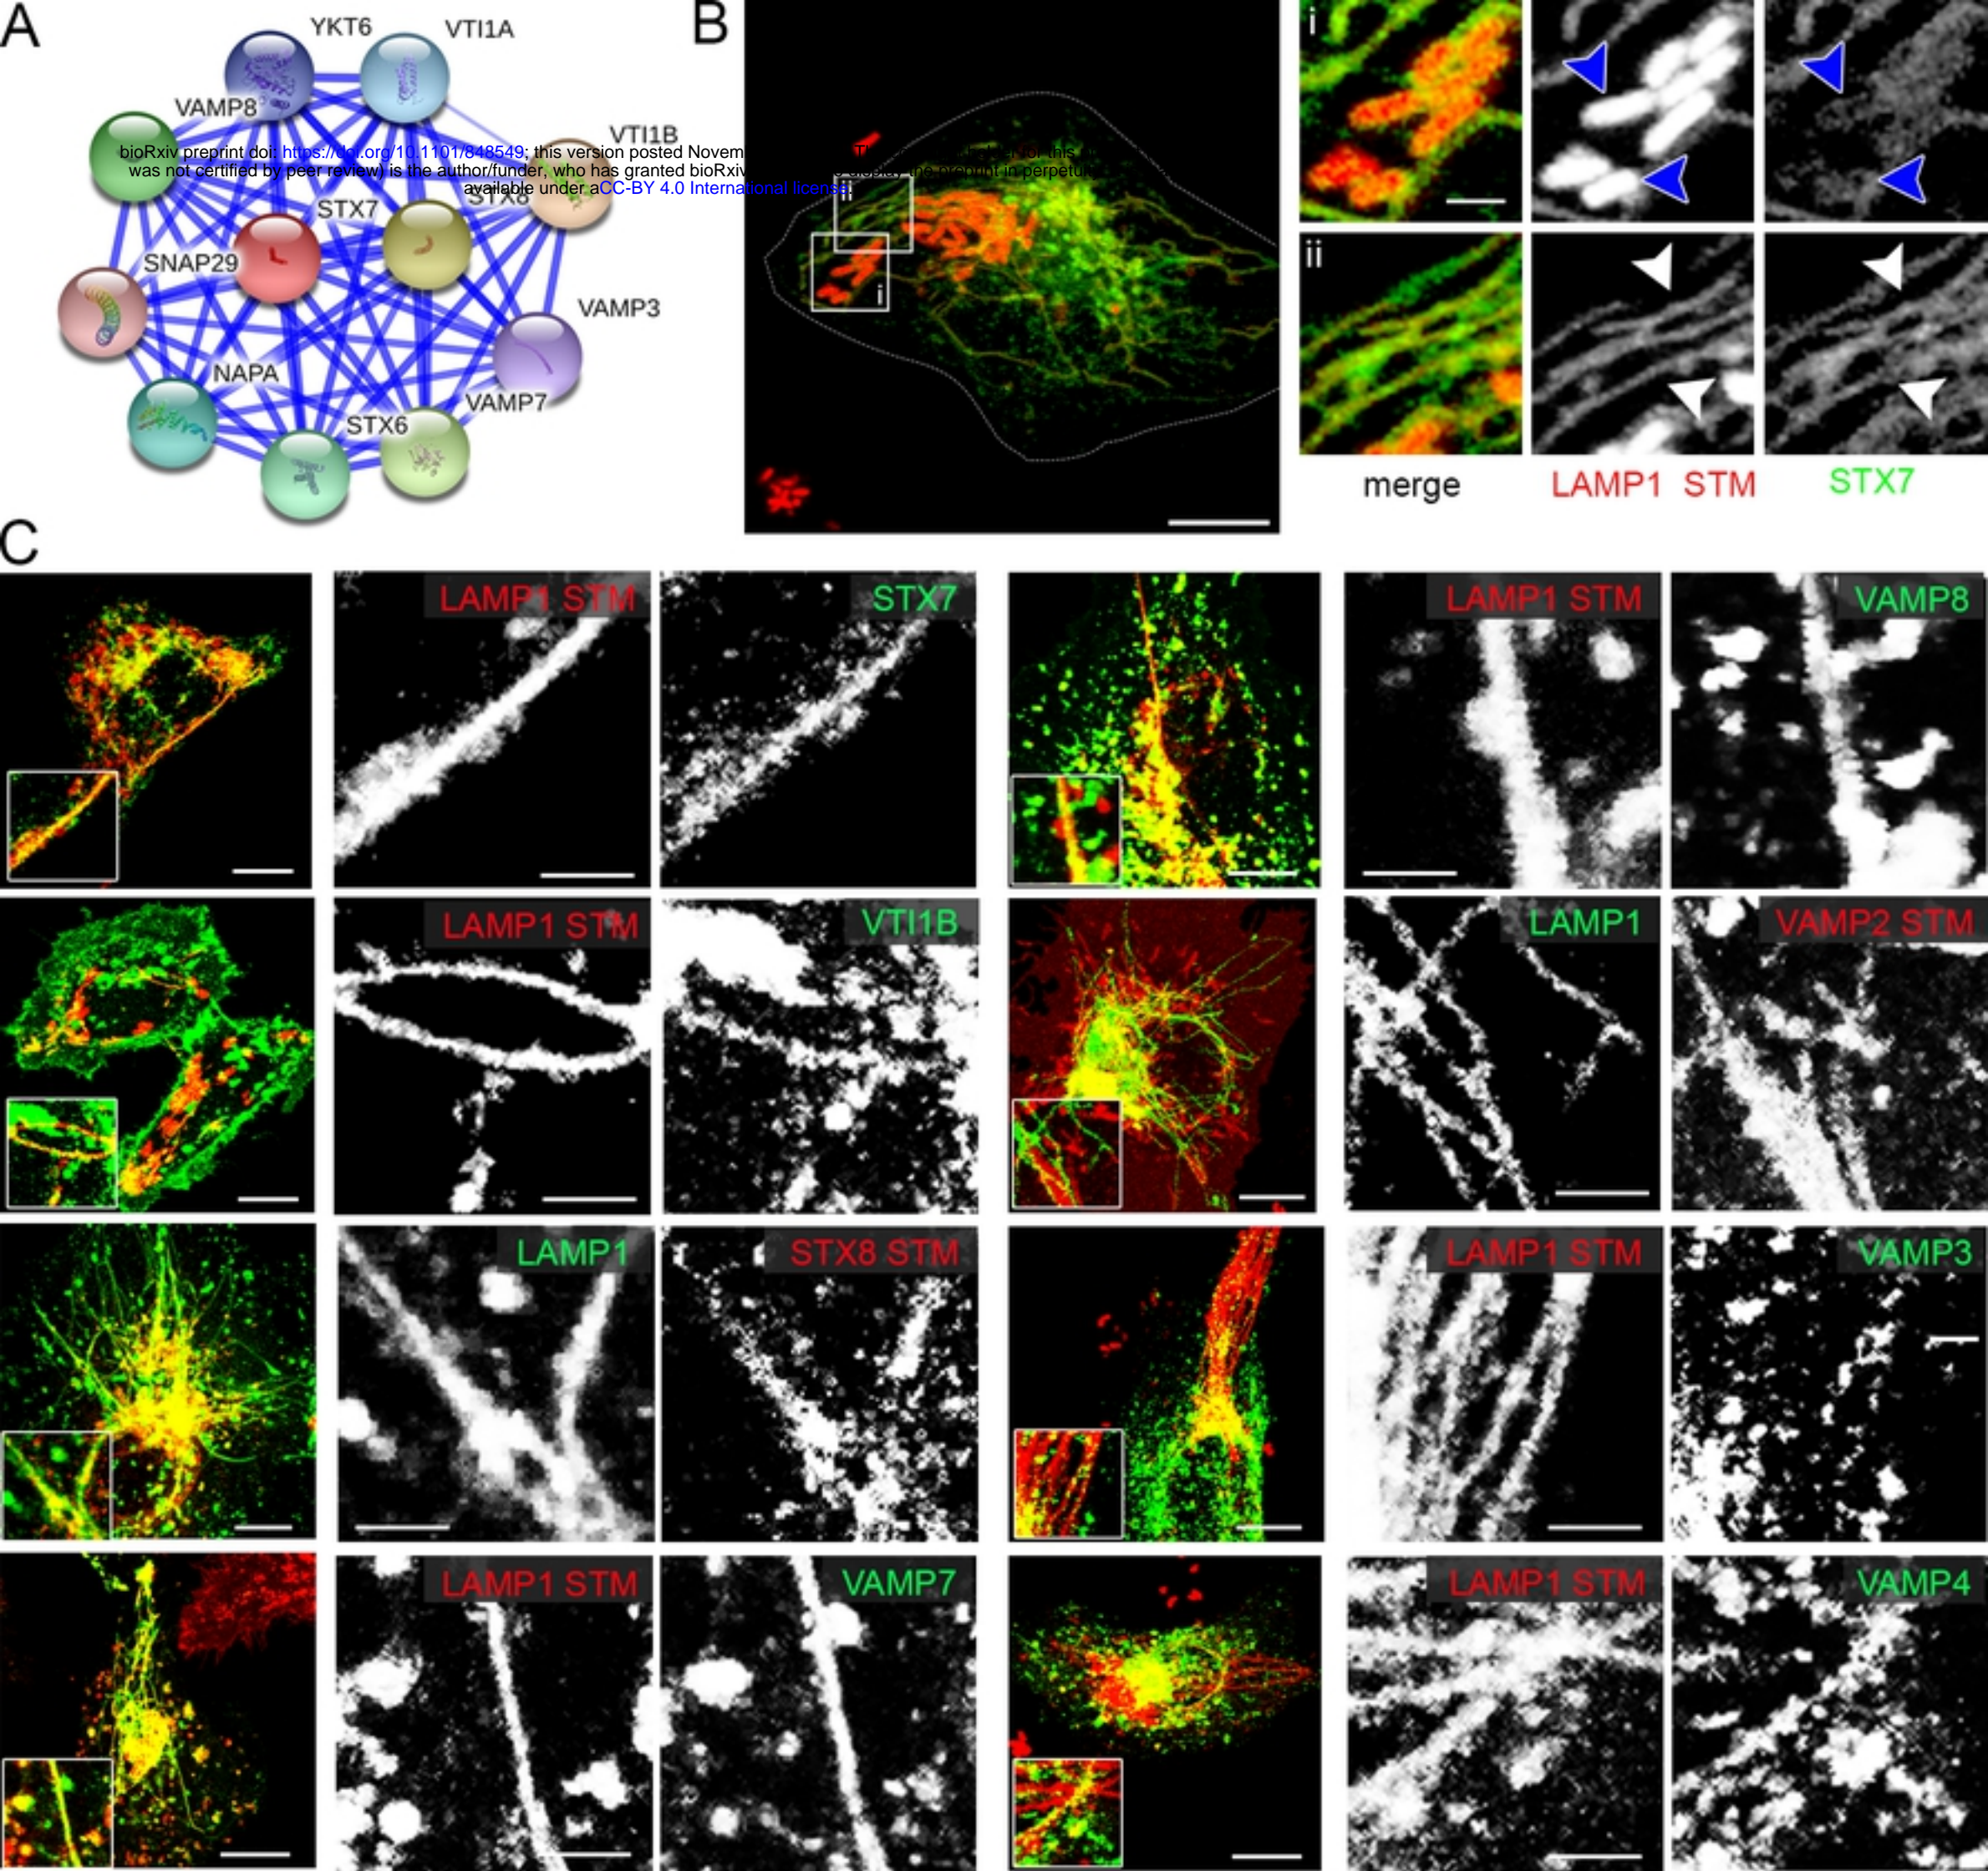

Figure 5



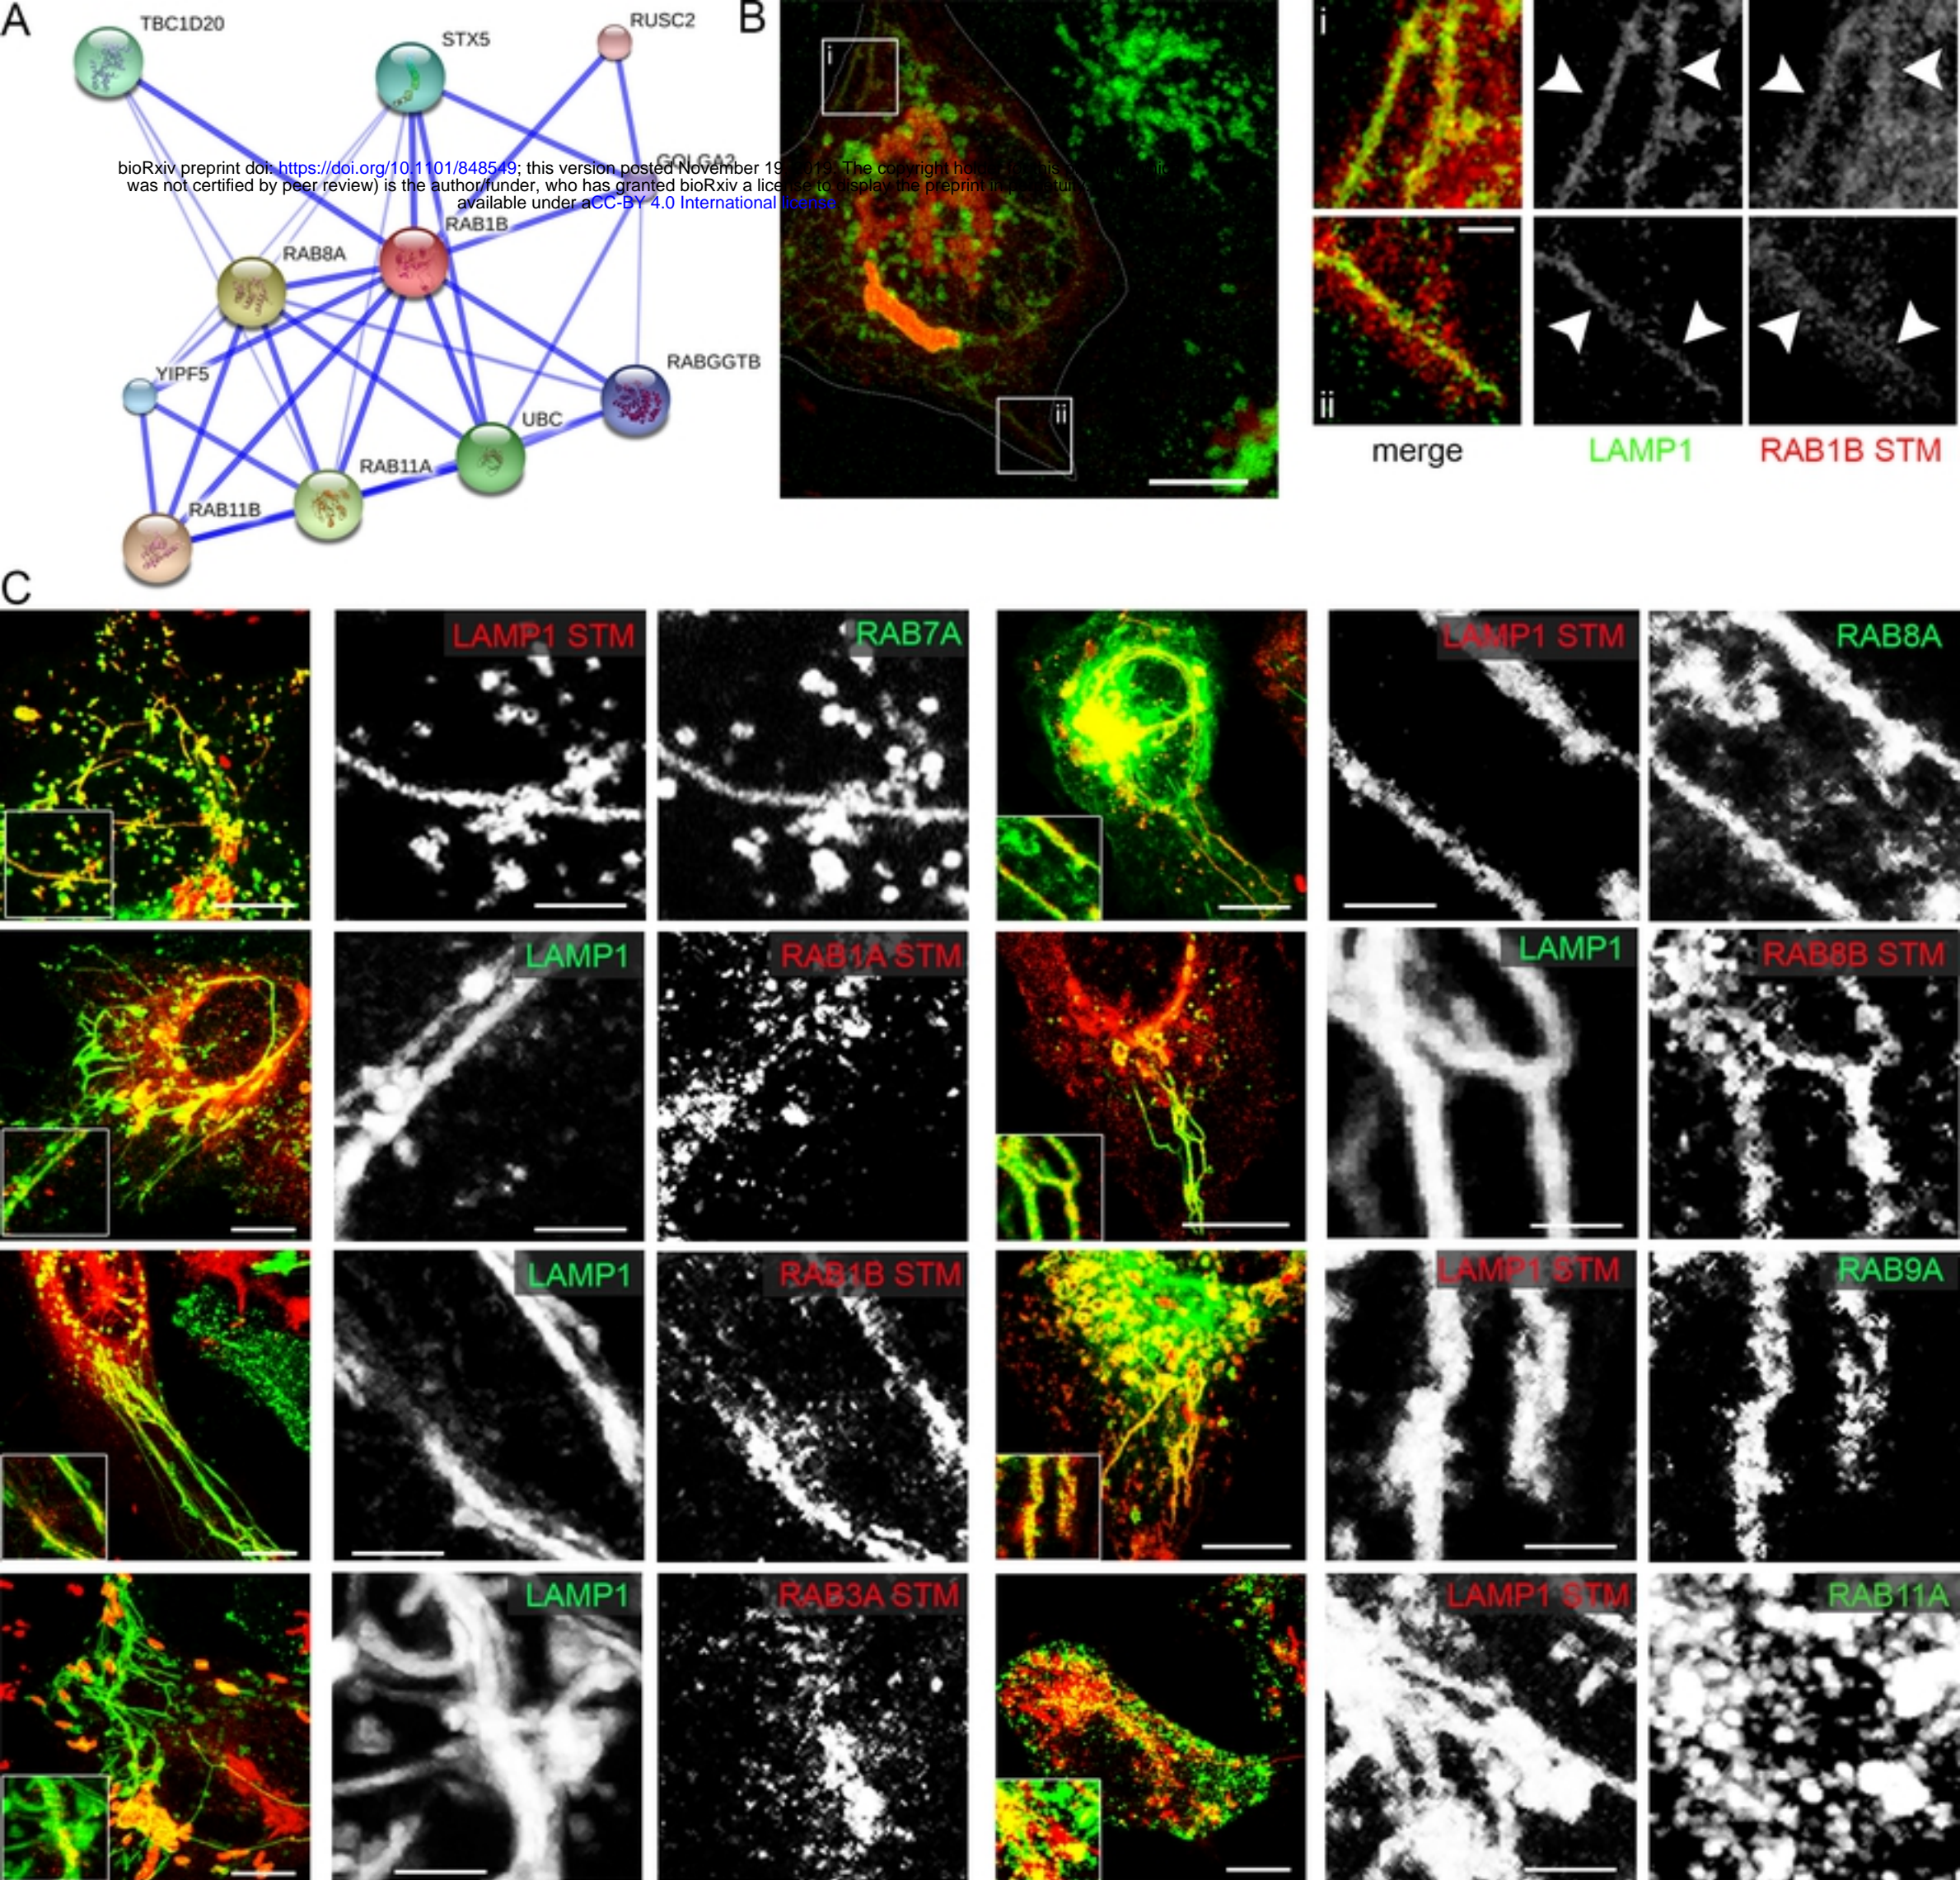

Figure 6



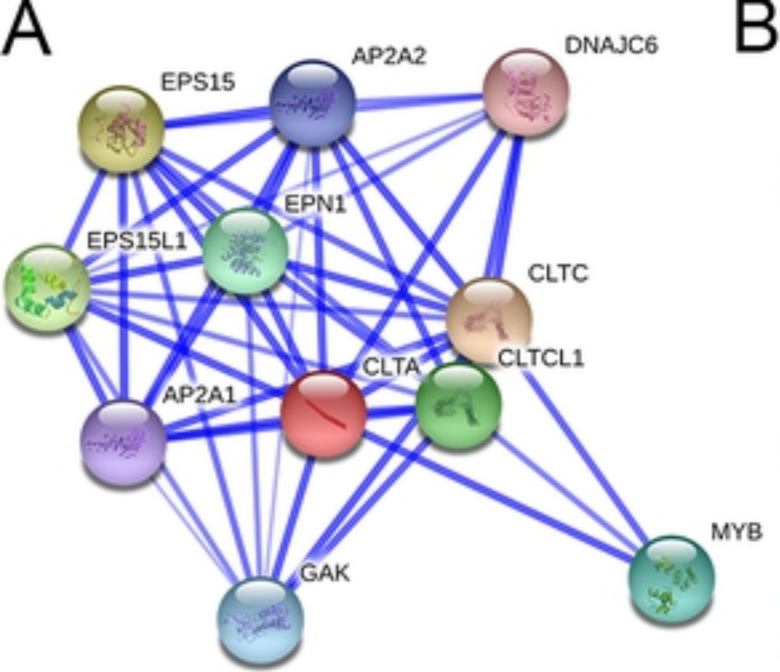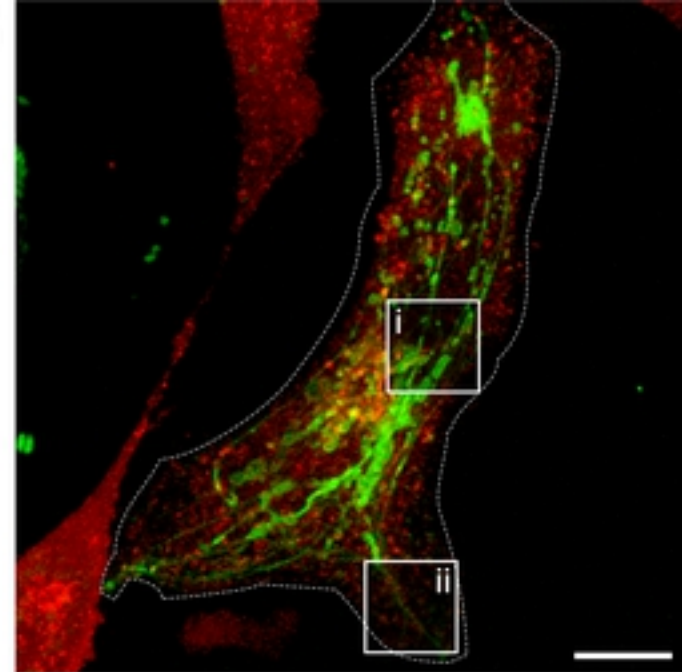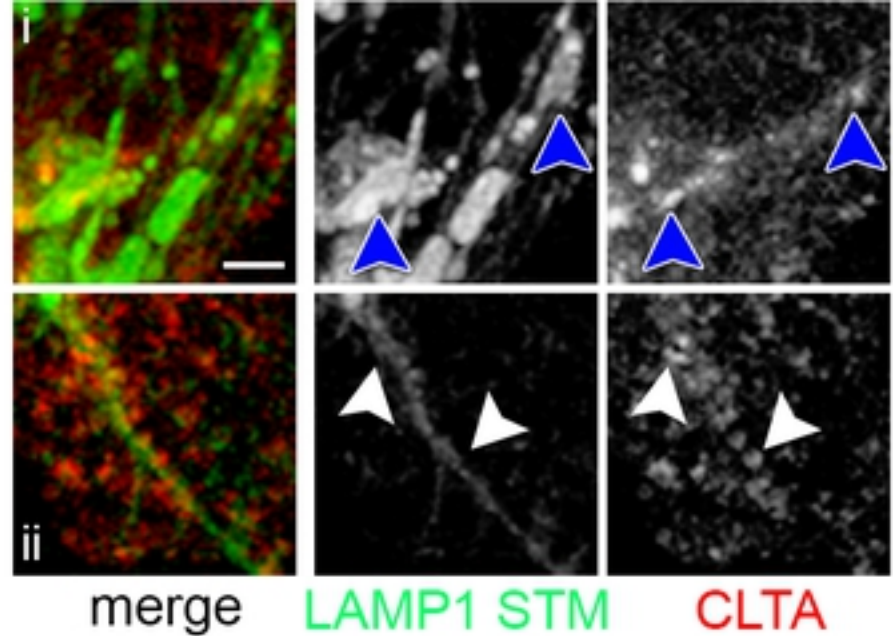

Figure 7

bioRxiv preprint doi: <https://doi.org/10.1101/348549>; this version posted November 19, 2019. The copyright holder for this preprint (which was not certified by peer review) is the author/funder, who has granted bioRxiv a license to display the preprint in perpetuity. It is made available under aCC-BY 4.0 International license.

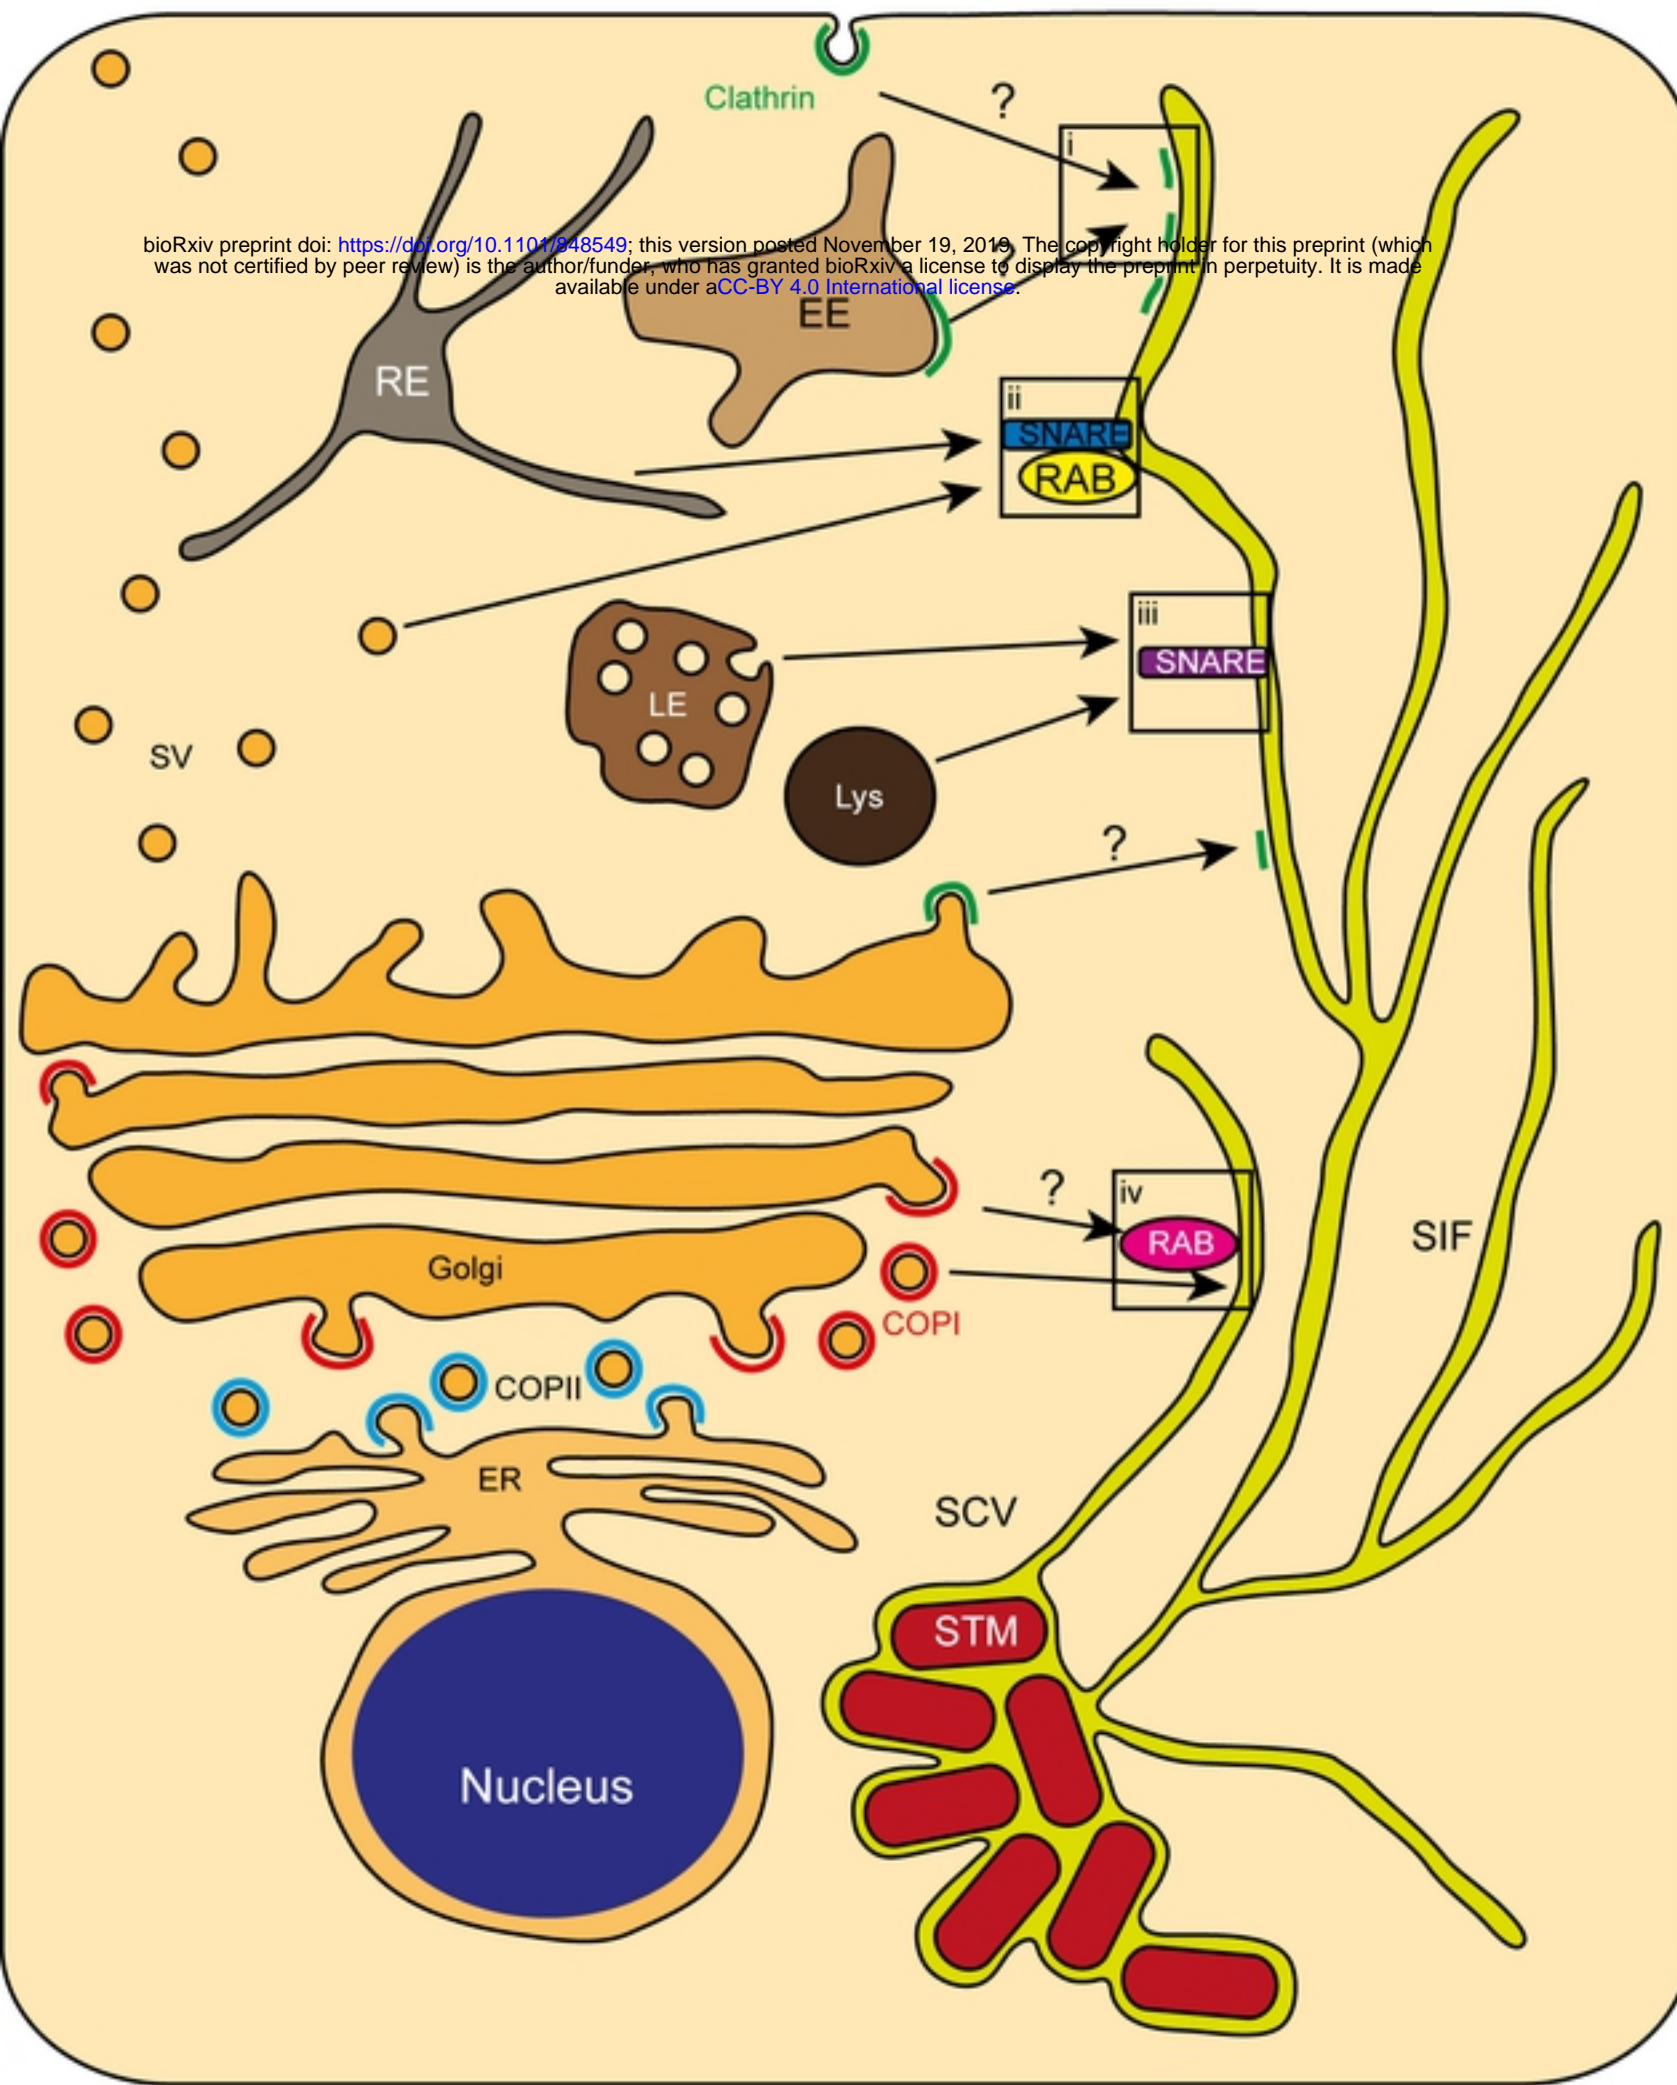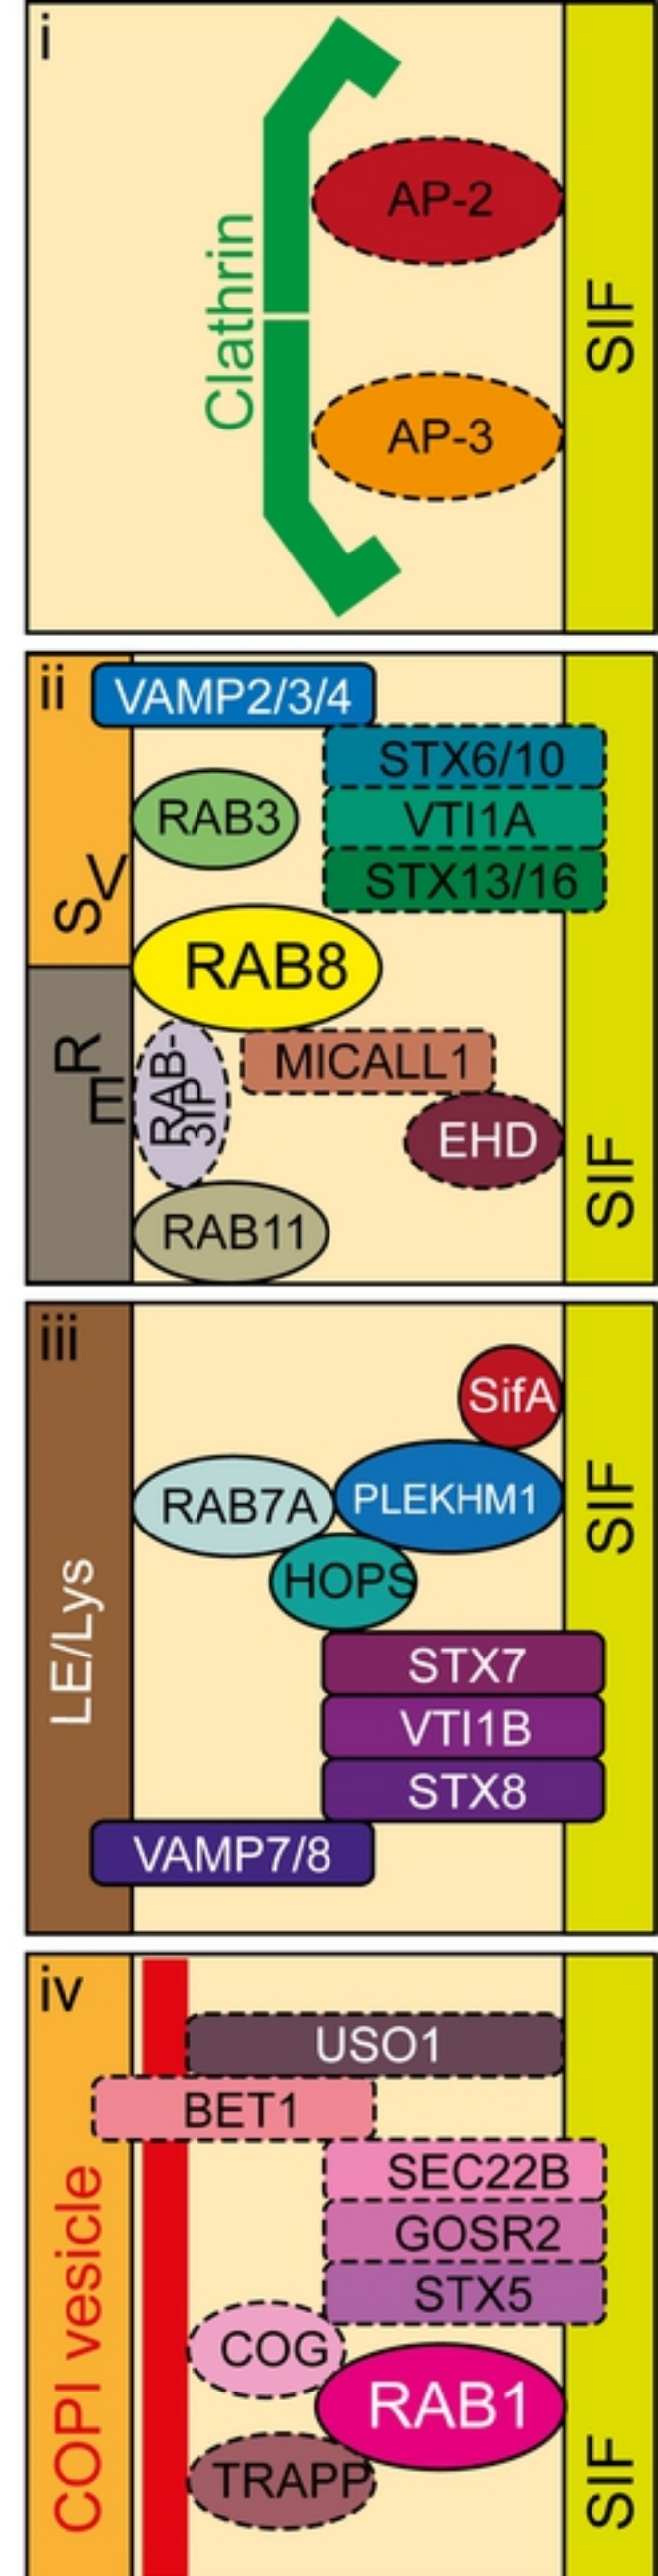

Figure 8
